# Supplementary material
Source: publisher figshare collection journal article supplement (https://rs.figshare.com/ndownloader/files/17680142)
Supplement: Supplementary file 1 [file 17680142]

## Sheet: Table S1
Table S1. Number of individuals per breed in the behavioral data.
Breed	N
Airedale Terrier	110
Akita	130
Alaskan Malamute	67
American Eskimo Dog	34
American Pit Bull Terrier	288
American Staffordshire Terrier	101
Australian Cattle Dog	276
Australian Shepherd	488
Basenji	33
Basset Hound	63
Beagle	192
Bearded Collie	35
Belgian Malinois	120
Belgian Sheepdog	46
Belgian Tervuren	114
Bernese Mountain Dog	174
Bichon Frise	107
Border Collie	597
Border Terrier	61
Borzoi	43
Boston Terrier	90
Bouvier des Flandres	32
Boxer	231
Brittany	99
Bull Terrier	40
Bulldog	52
Bullmastiff	76
Cairn Terrier	60
Cardigan Welsh Corgi	40
Cavalier King Charles Spaniel	93
Chesapeake Bay Retriever	35
Chihuahua	252
Chinese Crested	32
Chinook	64
Chow Chow	54
Cocker Spaniel (American)	160
Cocker Spaniel (English)	136
Collie	205
Dachshund	150
Dachshund (Miniature)	85
Dalmatian	85
Doberman Pinscher	297
English Setter	66
English Springer Spaniel	153
Eurasier	40
Flat-Coated Retriever	63
French Bulldog	56
German Shepherd	829
German Shorthaired Pointer	86
German Wirehaired Pointer	27
Golden Retriever	701
Gordon Setter	26
Great Dane	145
Great Pyrenees	71
Greyhound	112
Havanese	105
Irish Setter	55
Irish Wolfhound	44
Italian Greyhound	32
Jack Russell Terrier	252
Keeshond	29
Labrador Retriever	1300
Lhasa Apso	35
Maltese	99
Mastiff (English)	152
Miniature Pinscher	82
Miniature Schnauzer	134
Newfoundland	236
Norwegian Elkhound	27
Nova Scotia Duck Tolling Retriever	67
Papillon	85
Pekingese	30
Pembroke Welsh Corgi	109
Pomeranian	112
Poodle (Miniature)	115
Poodle (Standard)	300
Poodle (Toy)	58
Portuguese Water Dog	104
Pug	121
Rat Terrier	87
Redbone Coonhound	30
Rhodesian Ridgeback	141
Rottweiler	392
Saint Bernard	41
Samoyed	37
Shetland Sheepdog	257
Shiba Inu	149
Shih Tzu	133
Siberian Husky	200
Soft Coated Wheaten Terrier	232
Staffordshire Bull Terrier	103
Standard Schnauzer	44
Tibetan Terrier	29
Vizsla	76
Weimaraner	99
West Highland White Terrier	79
Whippet	150
Yorkshire Terrier	123
Anatolian Shepherd	26
Australian Kelpie	57
Parson Russell Terrier	30

## Sheet: Table S3
Table S3. Genes associated with behavioral traits at p ≤ 0.05 after Bonferroni correction, using SNPs in the gene to derive gene-level p values (meta-analysis, Fisher’s method).
Behavior	Ensemble ID	Gene Name	p
Attach & Atn Seeking	ENSCAFG00000023562	DMD	< 0.00001
Attach & Atn Seeking	ENSCAFG00000018100	SCAPER	< 0.00001
Attach & Atn Seeking	ENSCAFG00000005914	TMTC2	< 0.00001
Attach & Atn Seeking	ENSCAFG00000000353	STXBP5	< 0.00001
Attach & Atn Seeking	ENSCAFG00000013297	IGF2BP2	< 0.00001
Attach & Atn Seeking	ENSCAFG00000012413	RPS6KC1	< 0.00001
Attach & Atn Seeking	ENSCAFG00000006625	SFSWAP	< 0.00001
Attach & Atn Seeking	ENSCAFG00000007301	CWC27	< 0.00001
Attach & Atn Seeking	ENSCAFG00000000678	ZFPM2	< 0.00001
Attach & Atn Seeking	ENSCAFG00000000345	SRGAP1	< 0.00001
Attach & Atn Seeking	ENSCAFG00000000157	DCC	< 0.00001
Attach & Atn Seeking	ENSCAFG00000006743	PCMTD1	< 0.00001
Attach & Atn Seeking	ENSCAFG00000007500	SBF2	< 0.00001
Attach & Atn Seeking	ENSCAFG00000003988	SPATA5	< 0.00001
Attach & Atn Seeking	ENSCAFG00000002271	PHF14	< 0.00001
Attach & Atn Seeking	ENSCAFG00000007380	STAG1	< 0.00001
Attach & Atn Seeking	ENSCAFG00000000945	MAN1A1	< 0.00001
Attach & Atn Seeking	ENSCAFG00000018577	XIAP	< 0.00001
Attach & Atn Seeking	ENSCAFG00000010384	DNAH7	< 0.00001
Attach & Atn Seeking	ENSCAFG00000003678	CCNY	< 0.00001
Attach & Atn Seeking	ENSCAFG00000000677	LRP12	< 0.00001
Attach & Atn Seeking	ENSCAFG00000013823	SPECC1L	< 0.00001
Attach & Atn Seeking	ENSCAFG00000040856		< 0.00001
Attach & Atn Seeking	ENSCAFG00000017716	EEF2K	< 0.00001
Attach & Atn Seeking	ENSCAFG00000003570	FBXW2	< 0.00001
Attach & Atn Seeking	ENSCAFG00000016354	STIM2	< 0.00001
Attach & Atn Seeking	ENSCAFG00000013852	MATN2	1e-05
Attach & Atn Seeking	ENSCAFG00000001700	SND1	1e-05
Attach & Atn Seeking	ENSCAFG00000029666	HNRNPLL	3e-05
Attach & Atn Seeking	ENSCAFG00000005326	UVRAG	3e-05
Attach & Atn Seeking	ENSCAFG00000009207	AP3B1	4e-05
Attach & Atn Seeking	ENSCAFG00000013221	CTNNA3	6e-05
Attach & Atn Seeking	ENSCAFG00000005192	ACER3	0.0001
Attach & Atn Seeking	ENSCAFG00000009390	PPP3CC	0.00012
Attach & Atn Seeking	ENSCAFG00000034953		0.00013
Attach & Atn Seeking	ENSCAFG00000000828	RPS6KA2	0.00014
Attach & Atn Seeking	ENSCAFG00000001889	GABRB1	0.00016
Attach & Atn Seeking	ENSCAFG00000032548	KCNH5	0.00018
Attach & Atn Seeking	ENSCAFG00000000938	MCM9	0.00019
Attach & Atn Seeking	ENSCAFG00000003701	ATG5	0.00023
Attach & Atn Seeking	ENSCAFG00000006266	ARHGAP26	0.00028
Attach & Atn Seeking	ENSCAFG00000018564	GRIA3	0.00079
Attach & Atn Seeking	ENSCAFG00000003737	PARD3	0.00094
Attach & Atn Seeking	ENSCAFG00000018267	TOP3A	0.00102
Attach & Atn Seeking	ENSCAFG00000009088	NUP93	0.00122
Attach & Atn Seeking	ENSCAFG00000005766	SYT1	0.00133
Attach & Atn Seeking	ENSCAFG00000001852	ADAM22	0.00139
Attach & Atn Seeking	ENSCAFG00000007963	BLK	0.0015
Attach & Atn Seeking	ENSCAFG00000009609	TMEM117	0.00158
Attach & Atn Seeking	ENSCAFG00000003322	IFRD1	0.00186
Attach & Atn Seeking	ENSCAFG00000010140	BICDL1	0.00436
Attach & Atn Seeking	ENSCAFG00000008568	AGPAT5	0.00458
Attach & Atn Seeking	ENSCAFG00000035923		0.00476
Attach & Atn Seeking	ENSCAFG00000004182	ZC3H4	0.00499
Attach & Atn Seeking	ENSCAFG00000040232		0.00515
Attach & Atn Seeking	ENSCAFG00000034328		0.00575
Attach & Atn Seeking	ENSCAFG00000000935	CEP85L	0.00729
Attach & Atn Seeking	ENSCAFG00000005720	CLPB	0.00876
Attach & Atn Seeking	ENSCAFG00000003651	CSMD2	0.01188
Attach & Atn Seeking	ENSCAFG00000003334	ABCA13	0.0152
Attach & Atn Seeking	ENSCAFG00000005054	ZRANB3	0.01557
Attach & Atn Seeking	ENSCAFG00000010457	RIPOR2	0.01736
Attach & Atn Seeking	ENSCAFG00000029250	CDK13	0.01789
Attach & Atn Seeking	ENSCAFG00000001930	PGM5	0.0226
Attach & Atn Seeking	ENSCAFG00000007770	LNPEP	0.02354
Attach & Atn Seeking	ENSCAFG00000029394	HAS2	0.02359
Attach & Atn Seeking	ENSCAFG00000008501	PPEF2	0.02391
Attach & Atn Seeking	ENSCAFG00000009840	FAM13A	0.02414
Attach & Atn Seeking	ENSCAFG00000005373	SLC24A3	0.02592
Attach & Atn Seeking	ENSCAFG00000010811	LRRC28	0.03072
Attach & Atn Seeking	ENSCAFG00000020112	ABCD3	0.03504
Attach & Atn Seeking	ENSCAFG00000009427	PTPN13	0.04488
Attach & Atn Seeking	ENSCAFG00000001425	GKAP1	0.04725
Attach & Atn Seeking	ENSCAFG00000010984	VTI1A	0.04773
Attach & Atn Seeking	ENSCAFG00000007620	PREX2	0.04874
Chasing	ENSCAFG00000003554	ASCC3	< 0.00001
Chasing	ENSCAFG00000000670	RIMS2	< 0.00001
Chasing	ENSCAFG00000008141	FBXW7	< 0.00001
Chasing	ENSCAFG00000018720	ATG4C	< 0.00001
Chasing	ENSCAFG00000005849	TBC1D5	< 0.00001
Chasing	ENSCAFG00000006568	ARHGAP22	< 0.00001
Chasing	ENSCAFG00000014845	FAM193A	< 0.00001
Chasing	ENSCAFG00000005998	LHFPL6	< 0.00001
Chasing	ENSCAFG00000003553	CADPS2	< 0.00001
Chasing	ENSCAFG00000018081	SPECC1	< 0.00001
Chasing	ENSCAFG00000011773	C6H7orf50	< 0.00001
Chasing	ENSCAFG00000010354	NT5C2	< 0.00001
Chasing	ENSCAFG00000002155		< 0.00001
Chasing	ENSCAFG00000034837		< 0.00001
Chasing	ENSCAFG00000000770		< 0.00001
Chasing	ENSCAFG00000002316	MLIP	< 0.00001
Chasing	ENSCAFG00000030939		< 0.00001
Chasing	ENSCAFG00000002562	COL19A1	< 0.00001
Chasing	ENSCAFG00000014682	HTT	< 0.00001
Chasing	ENSCAFG00000014403	SORCS2	< 0.00001
Chasing	ENSCAFG00000008886	FGF5	< 0.00001
Chasing	ENSCAFG00000014975	EIF4G3	< 0.00001
Chasing	ENSCAFG00000006920	KCNIP3	1e-05
Chasing	ENSCAFG00000004986	GDPD4	1e-05
Chasing	ENSCAFG00000009831	PRMT3	4e-05
Chasing	ENSCAFG00000007152	PTPRG	4e-05
Chasing	ENSCAFG00000003580	GRIK2	4e-05
Chasing	ENSCAFG00000020373	USP33	5e-05
Chasing	ENSCAFG00000004817	ELF1	6e-05
Chasing	ENSCAFG00000010034	RYR2	7e-05
Chasing	ENSCAFG00000015345	CC2D2A	7e-05
Chasing	ENSCAFG00000008123	TENM3	9e-05
Chasing	ENSCAFG00000007246	CYP7B1	0.00016
Chasing	ENSCAFG00000000677	LRP12	0.00017
Chasing	ENSCAFG00000038312		0.00017
Chasing	ENSCAFG00000009924	TAOK3	0.00019
Chasing	ENSCAFG00000010744	NAV1	0.00025
Chasing	ENSCAFG00000000459	TBC1D15	0.00028
Chasing	ENSCAFG00000003176	DPY19L2	0.00042
Chasing	ENSCAFG00000038858		0.0005
Chasing	ENSCAFG00000000353	STXBP5	0.00054
Chasing	ENSCAFG00000031408	CFAP299	0.00055
Chasing	ENSCAFG00000034423		0.00066
Chasing	ENSCAFG00000029135	GDNF	0.00098
Chasing	ENSCAFG00000002081	CDC37L1	0.00109
Chasing	ENSCAFG00000003927	ELAVL4	0.00127
Chasing	ENSCAFG00000000011	NFATC1	0.0014
Chasing	ENSCAFG00000002083		0.00145
Chasing	ENSCAFG00000007009	TMEM68	0.00165
Chasing	ENSCAFG00000002271	PHF14	0.00165
Chasing	ENSCAFG00000010822	ACTN2	0.00185
Chasing	ENSCAFG00000012156	ARSJ	0.00199
Chasing	ENSCAFG00000004535	NR2C2	0.00216
Chasing	ENSCAFG00000038915		0.00268
Chasing	ENSCAFG00000036400		0.00335
Chasing	ENSCAFG00000016428	ARG2	0.00387
Chasing	ENSCAFG00000008185	ARFIP1	0.0042
Chasing	ENSCAFG00000003778	AFG1L	0.00472
Chasing	ENSCAFG00000018181		0.00514
Chasing	ENSCAFG00000013247	PRR14L	0.00537
Chasing	ENSCAFG00000006293	NR3C1	0.00645
Chasing	ENSCAFG00000006255	NBEA	0.00655
Chasing	ENSCAFG00000010226	CDKAL1	0.00664
Chasing	ENSCAFG00000017519	TNMD	0.007
Chasing	ENSCAFG00000010000	C27H12orf40	0.00844
Chasing	ENSCAFG00000035216		0.00891
Chasing	ENSCAFG00000017167	KCNN3	0.01
Chasing	ENSCAFG00000033376		0.01033
Chasing	ENSCAFG00000011155	STARD9	0.01171
Chasing	ENSCAFG00000012781	XPR1	0.01231
Chasing	ENSCAFG00000003663	GSN	0.01233
Chasing	ENSCAFG00000002941	ME1	0.01565
Chasing	ENSCAFG00000010114	CIT	0.01607
Chasing	ENSCAFG00000015800	MYO5A	0.01664
Chasing	ENSCAFG00000007698	ZNF827	0.01726
Chasing	ENSCAFG00000004406	FBLN2	0.01887
Chasing	ENSCAFG00000013067	PAK2	0.02479
Chasing	ENSCAFG00000040257		0.02724
Chasing	ENSCAFG00000006655	ADGRD1	0.02745
Chasing	ENSCAFG00000010735	GRAMD1C	0.02932
Chasing	ENSCAFG00000011688	TRUB1	0.03313
Chasing	ENSCAFG00000007822	BDP1	0.0392
Chasing	ENSCAFG00000006376		0.03925
Chasing	ENSCAFG00000015232	ZNF182	0.04206
Chasing	ENSCAFG00000011148	RGS9	0.04306
Chasing	ENSCAFG00000013239	SCRN3	0.04462
Chasing	ENSCAFG00000017262	MYH10	0.04874
Dog Aggression	ENSCAFG00000009924	TAOK3	< 0.00001
Dog Aggression	ENSCAFG00000023804	HERC3	< 0.00001
Dog Aggression	ENSCAFG00000031429	GNA14	< 0.00001
Dog Aggression	ENSCAFG00000002155		< 0.00001
Dog Aggression	ENSCAFG00000018100	SCAPER	< 0.00001
Dog Aggression	ENSCAFG00000009911	FBXW4	< 0.00001
Dog Aggression	ENSCAFG00000018864	GPC3	< 0.00001
Dog Aggression	ENSCAFG00000024350	CENPP	< 0.00001
Dog Aggression	ENSCAFG00000023460	FBRSL1	< 0.00001
Dog Aggression	ENSCAFG00000020112	ABCD3	< 0.00001
Dog Aggression	ENSCAFG00000001010	PPP2CA	< 0.00001
Dog Aggression	ENSCAFG00000015679	RGS7	< 0.00001
Dog Aggression	ENSCAFG00000001016	TRDN	< 0.00001
Dog Aggression	ENSCAFG00000008431	C30H15orf41	< 0.00001
Dog Aggression	ENSCAFG00000011936	TRPM8	< 0.00001
Dog Aggression	ENSCAFG00000014222	IFT80	< 0.00001
Dog Aggression	ENSCAFG00000000678	ZFPM2	1e-05
Dog Aggression	ENSCAFG00000001935	AKAP9	1e-05
Dog Aggression	ENSCAFG00000018850	HS6ST2	1e-05
Dog Aggression	ENSCAFG00000002364	ADGRL3	2e-05
Dog Aggression	ENSCAFG00000006196	CPNE4	2e-05
Dog Aggression	ENSCAFG00000010941	SLC24A4	2e-05
Dog Aggression	ENSCAFG00000015803	SDCCAG8	2e-05
Dog Aggression	ENSCAFG00000009842	OPCML	7e-05
Dog Aggression	ENSCAFG00000010772	GAL	0.00017
Dog Aggression	ENSCAFG00000006766	DLC1	0.00027
Dog Aggression	ENSCAFG00000008557	APP	0.00028
Dog Aggression	ENSCAFG00000033673		0.00042
Dog Aggression	ENSCAFG00000009771	TTC3	0.00049
Dog Aggression	ENSCAFG00000015700	STX18	0.00077
Dog Aggression	ENSCAFG00000007364	KLKB1	0.00119
Dog Aggression	ENSCAFG00000009831	PRMT3	0.00149
Dog Aggression	ENSCAFG00000007822	BDP1	0.0015
Dog Aggression	ENSCAFG00000013733	GATM	0.00161
Dog Aggression	ENSCAFG00000019194	SLC43A2	0.00199
Dog Aggression	ENSCAFG00000002390	FAM178B	0.002
Dog Aggression	ENSCAFG00000000239	PDE7B	0.00237
Dog Aggression	ENSCAFG00000000079	RELCH	0.00239
Dog Aggression	ENSCAFG00000028659		0.00248
Dog Aggression	ENSCAFG00000009327	ADGRG7	0.00287
Dog Aggression	ENSCAFG00000011544	AOX4	0.00361
Dog Aggression	ENSCAFG00000014845	FAM193A	0.00411
Dog Aggression	ENSCAFG00000000935	CEP85L	0.00428
Dog Aggression	ENSCAFG00000007235	HIPK3	0.00443
Dog Aggression	ENSCAFG00000004731	TENM4	0.00465
Dog Aggression	ENSCAFG00000028870	RAB6A	0.00592
Dog Aggression	ENSCAFG00000039775		0.00713
Dog Aggression	ENSCAFG00000007251	KRT5	0.00842
Dog Aggression	ENSCAFG00000007803	GALNTL6	0.00855
Dog Aggression	ENSCAFG00000004872	PTPN4	0.01241
Dog Aggression	ENSCAFG00000005040	KLF12	0.01357
Dog Aggression	ENSCAFG00000004436	RB1	0.01389
Dog Aggression	ENSCAFG00000016949	ALOXE3	0.01423
Dog Aggression	ENSCAFG00000011430	STXBP5L	0.01608
Dog Aggression	ENSCAFG00000020012	PKD1L2	0.01668
Dog Aggression	ENSCAFG00000013004	CACNA1E	0.01783
Dog Aggression	ENSCAFG00000035815		0.02105
Dog Aggression	ENSCAFG00000015343	DCAF6	0.02202
Dog Aggression	ENSCAFG00000001355	KIAA2026	0.02298
Dog Aggression	ENSCAFG00000013678	MBIP	0.02462
Dog Aggression	ENSCAFG00000030076	LMX1B	0.02678
Dog Aggression	ENSCAFG00000005423	STT3B	0.0274
Dog Aggression	ENSCAFG00000002323	MGAT4A	0.02843
Dog Aggression	ENSCAFG00000010766	TESMIN	0.03028
Dog Aggression	ENSCAFG00000013057	MAP3K15	0.03782
Dog Aggression	ENSCAFG00000030145	AUH	0.0393
Dog Aggression	ENSCAFG00000004282	WDFY2	0.04343
Dog Aggression	ENSCAFG00000000364	WIF1	0.04865
Dog Aggression	ENSCAFG00000014569	PDCD10	0.04909
Dog Fear	ENSCAFG00000008827	ALMS1	< 0.00001
Dog Fear	ENSCAFG00000013297	IGF2BP2	< 0.00001
Dog Fear	ENSCAFG00000011430	STXBP5L	< 0.00001
Dog Fear	ENSCAFG00000009207	AP3B1	< 0.00001
Dog Fear	ENSCAFG00000002257	ICA1	< 0.00001
Dog Fear	ENSCAFG00000009242	FILIP1L	< 0.00001
Dog Fear	ENSCAFG00000040856		< 0.00001
Dog Fear	ENSCAFG00000028659		< 0.00001
Dog Fear	ENSCAFG00000009390	PPP3CC	< 0.00001
Dog Fear	ENSCAFG00000005692	RPTOR	< 0.00001
Dog Fear	ENSCAFG00000018100	SCAPER	< 0.00001
Dog Fear	ENSCAFG00000006592	STK32A	< 0.00001
Dog Fear	ENSCAFG00000006248	CHL1	< 0.00001
Dog Fear	ENSCAFG00000005699	DNAJC18	< 0.00001
Dog Fear	ENSCAFG00000000334	ADAMTS2	< 0.00001
Dog Fear	ENSCAFG00000031408	CFAP299	< 0.00001
Dog Fear	ENSCAFG00000000945	MAN1A1	< 0.00001
Dog Fear	ENSCAFG00000013228	CNKSR2	< 0.00001
Dog Fear	ENSCAFG00000003657	NBAS	< 0.00001
Dog Fear	ENSCAFG00000004436	RB1	< 0.00001
Dog Fear	ENSCAFG00000004586	RSU1	< 0.00001
Dog Fear	ENSCAFG00000003373	DGKI	1e-05
Dog Fear	ENSCAFG00000017453	INTS3	3e-05
Dog Fear	ENSCAFG00000000932	SLC35F1	4e-05
Dog Fear	ENSCAFG00000001277	ANKS1A	9e-05
Dog Fear	ENSCAFG00000010811	LRRC28	9e-05
Dog Fear	ENSCAFG00000001002	SMPDL3A	9e-05
Dog Fear	ENSCAFG00000008279	PTPRJ	9e-05
Dog Fear	ENSCAFG00000016811	RHBG	0.0001
Dog Fear	ENSCAFG00000001879	NUAK1	0.0001
Dog Fear	ENSCAFG00000006743	PCMTD1	0.00012
Dog Fear	ENSCAFG00000009270	PEBP4	0.00013
Dog Fear	ENSCAFG00000035994		0.00015
Dog Fear	ENSCAFG00000004799	GBX1	0.00032
Dog Fear	ENSCAFG00000017298	MAP2K1	0.00042
Dog Fear	ENSCAFG00000017932	ARID3B	0.00056
Dog Fear	ENSCAFG00000033403		0.00057
Dog Fear	ENSCAFG00000033988		0.00066
Dog Fear	ENSCAFG00000001646	PRUNE2	0.00074
Dog Fear	ENSCAFG00000012344	FASTKD1	0.00078
Dog Fear	ENSCAFG00000033910		0.00084
Dog Fear	ENSCAFG00000005061	LMO7	0.00114
Dog Fear	ENSCAFG00000002848	BCKDHB	0.0012
Dog Fear	ENSCAFG00000032976		0.00124
Dog Fear	ENSCAFG00000012967	PCYT1A	0.00138
Dog Fear	ENSCAFG00000013995	CABIN1	0.0015
Dog Fear	ENSCAFG00000020135	FNBP1L	0.00159
Dog Fear	ENSCAFG00000008370	RNF13	0.00174
Dog Fear	ENSCAFG00000008101	PLOD2	0.00185
Dog Fear	ENSCAFG00000029740	MSRB3	0.00225
Dog Fear	ENSCAFG00000014670		0.00244
Dog Fear	ENSCAFG00000011155	STARD9	0.00288
Dog Fear	ENSCAFG00000000361	TBC1D30	0.00307
Dog Fear	ENSCAFG00000006264	PCLO	0.00315
Dog Fear	ENSCAFG00000002096	UXS1	0.00327
Dog Fear	ENSCAFG00000011680	ATP11B	0.00335
Dog Fear	ENSCAFG00000015787	PPP2R5E	0.00391
Dog Fear	ENSCAFG00000010766	TESMIN	0.00399
Dog Fear	ENSCAFG00000005814	RAB5A	0.00488
Dog Fear	ENSCAFG00000014989	WDHD1	0.00502
Dog Fear	ENSCAFG00000000345	SRGAP1	0.00512
Dog Fear	ENSCAFG00000004369	NOX4	0.00543
Dog Fear	ENSCAFG00000023549	C9orf3	0.00613
Dog Fear	ENSCAFG00000010536	CARMIL1	0.00615
Dog Fear	ENSCAFG00000036543		0.0071
Dog Fear	ENSCAFG00000003334	ABCA13	0.0071
Dog Fear	ENSCAFG00000011756	PLXNA2	0.00763
Dog Fear	ENSCAFG00000000678	ZFPM2	0.01058
Dog Fear	ENSCAFG00000007533	ANKRD27	0.01077
Dog Fear	ENSCAFG00000000430	ESR1	0.01091
Dog Fear	ENSCAFG00000004568	CUBN	0.01173
Dog Fear	ENSCAFG00000010745	IGHMBP2	0.01582
Dog Fear	ENSCAFG00000037826		0.02303
Dog Fear	ENSCAFG00000013246	LIPH	0.02451
Dog Fear	ENSCAFG00000015422	KIAA0753	0.02493
Dog Fear	ENSCAFG00000030873		0.02561
Dog Fear	ENSCAFG00000032716	EMCN	0.02781
Dog Fear	ENSCAFG00000008276	HLTF	0.03036
Dog Fear	ENSCAFG00000002372	ZNF135	0.03058
Dog Fear	ENSCAFG00000010102	SEMA5A	0.03287
Dog Fear	ENSCAFG00000019473	PRDM16	0.03744
Dog Fear	ENSCAFG00000002390	FAM178B	0.0419
Dog Fear	ENSCAFG00000014255		0.04258
Dog Fear	ENSCAFG00000006042	SLC23A2	0.04769
Dog Rivalry	ENSCAFG00000039058		< 0.00001
Dog Rivalry	ENSCAFG00000008909	CNBD1	< 0.00001
Dog Rivalry	ENSCAFG00000028659		< 0.00001
Dog Rivalry	ENSCAFG00000016111	FOXK1	< 0.00001
Dog Rivalry	ENSCAFG00000020112	ABCD3	< 0.00001
Dog Rivalry	ENSCAFG00000005040	KLF12	< 0.00001
Dog Rivalry	ENSCAFG00000017651	DNM2	< 0.00001
Dog Rivalry	ENSCAFG00000003005	CREB5	< 0.00001
Dog Rivalry	ENSCAFG00000001358	AGTPBP1	< 0.00001
Dog Rivalry	ENSCAFG00000017996	ACACA	< 0.00001
Dog Rivalry	ENSCAFG00000019514	NPHP4	< 0.00001
Dog Rivalry	ENSCAFG00000005862	PLCL2	< 0.00001
Dog Rivalry	ENSCAFG00000039648		< 0.00001
Dog Rivalry	ENSCAFG00000012413	RPS6KC1	< 0.00001
Dog Rivalry	ENSCAFG00000030938		< 0.00001
Dog Rivalry	ENSCAFG00000016200	TCF12	1e-05
Dog Rivalry	ENSCAFG00000001630	MYH9	1e-05
Dog Rivalry	ENSCAFG00000030539		2e-05
Dog Rivalry	ENSCAFG00000004343	EFCC1	2e-05
Dog Rivalry	ENSCAFG00000001646	PRUNE2	3e-05
Dog Rivalry	ENSCAFG00000002413	DST	4e-05
Dog Rivalry	ENSCAFG00000017293	CEP128	5e-05
Dog Rivalry	ENSCAFG00000002271	PHF14	6e-05
Dog Rivalry	ENSCAFG00000014222	IFT80	0.00014
Dog Rivalry	ENSCAFG00000031628		0.00016
Dog Rivalry	ENSCAFG00000005549	UCP3	0.00016
Dog Rivalry	ENSCAFG00000009831	PRMT3	0.00021
Dog Rivalry	ENSCAFG00000019133	MTMR1	0.00022
Dog Rivalry	ENSCAFG00000007803	GALNTL6	0.00025
Dog Rivalry	ENSCAFG00000000086	CDH20	0.00028
Dog Rivalry	ENSCAFG00000012638	DPP3	0.00028
Dog Rivalry	ENSCAFG00000002663	CD109	0.00031
Dog Rivalry	ENSCAFG00000001166	KHDRBS3	0.00037
Dog Rivalry	ENSCAFG00000033142		0.00037
Dog Rivalry	ENSCAFG00000005809	TM9SF2	0.00039
Dog Rivalry	ENSCAFG00000012545	CARF	0.00042
Dog Rivalry	ENSCAFG00000016354	STIM2	0.00055
Dog Rivalry	ENSCAFG00000024975	GRXCR1	0.00055
Dog Rivalry	ENSCAFG00000002390	FAM178B	0.00056
Dog Rivalry	ENSCAFG00000018890	TXNDC11	0.00066
Dog Rivalry	ENSCAFG00000010677	EYA2	0.00097
Dog Rivalry	ENSCAFG00000012804	MACO1	0.00141
Dog Rivalry	ENSCAFG00000033819		0.00185
Dog Rivalry	ENSCAFG00000011176	NR5A2	0.0022
Dog Rivalry	ENSCAFG00000040595		0.00424
Dog Rivalry	ENSCAFG00000005405	SEC23B	0.00429
Dog Rivalry	ENSCAFG00000013057	MAP3K15	0.00441
Dog Rivalry	ENSCAFG00000010224		0.00443
Dog Rivalry	ENSCAFG00000003420	VRK3	0.00448
Dog Rivalry	ENSCAFG00000035258		0.00457
Dog Rivalry	ENSCAFG00000006462	UBXN8	0.00477
Dog Rivalry	ENSCAFG00000003995	FYN	0.00502
Dog Rivalry	ENSCAFG00000031241	LRRC55	0.00522
Dog Rivalry	ENSCAFG00000015255	SLC35F4	0.00528
Dog Rivalry	ENSCAFG00000013733	GATM	0.00562
Dog Rivalry	ENSCAFG00000002640	RIMS1	0.00575
Dog Rivalry	ENSCAFG00000000719	NUDCD1	0.00589
Dog Rivalry	ENSCAFG00000023912	LYG2	0.00593
Dog Rivalry	ENSCAFG00000033917		0.00599
Dog Rivalry	ENSCAFG00000007575	DPY19L3	0.00768
Dog Rivalry	ENSCAFG00000000655	TMEM181	0.00816
Dog Rivalry	ENSCAFG00000020080	PTBP2	0.00832
Dog Rivalry	ENSCAFG00000004855	EPB41L5	0.00868
Dog Rivalry	ENSCAFG00000010267	RAP1GDS1	0.00886
Dog Rivalry	ENSCAFG00000003467	FBXL4	0.00909
Dog Rivalry	ENSCAFG00000011983	HSPBAP1	0.00957
Dog Rivalry	ENSCAFG00000024350	CENPP	0.01039
Dog Rivalry	ENSCAFG00000011544	AOX4	0.0105
Dog Rivalry	ENSCAFG00000000678	ZFPM2	0.01104
Dog Rivalry	ENSCAFG00000010942	CCDC91	0.01675
Dog Rivalry	ENSCAFG00000005121	SFMBT2	0.01852
Dog Rivalry	ENSCAFG00000003749	SLC7A11	0.02541
Dog Rivalry	ENSCAFG00000008407	EIF2A	0.02618
Dog Rivalry	ENSCAFG00000005873	RFTN1	0.02628
Dog Rivalry	ENSCAFG00000008185	ARFIP1	0.02679
Dog Rivalry	ENSCAFG00000007494	SGTB	0.03131
Dog Rivalry	ENSCAFG00000014062	FANCM	0.03165
Dog Rivalry	ENSCAFG00000036254		0.03286
Dog Rivalry	ENSCAFG00000035994		0.03859
Dog Rivalry	ENSCAFG00000003553	CADPS2	0.04846
Energy	ENSCAFG00000003737	PARD3	< 0.00001
Energy	ENSCAFG00000001106	LAMA2	< 0.00001
Energy	ENSCAFG00000001700	SND1	< 0.00001
Energy	ENSCAFG00000009699	CHD9	< 0.00001
Energy	ENSCAFG00000018849	SNX29	< 0.00001
Energy	ENSCAFG00000023267	PRIM2	< 0.00001
Energy	ENSCAFG00000007301	CWC27	< 0.00001
Energy	ENSCAFG00000008199	FMN1	< 0.00001
Energy	ENSCAFG00000000430	ESR1	< 0.00001
Energy	ENSCAFG00000018024	TRAPPC8	< 0.00001
Energy	ENSCAFG00000009971	ARMH3	< 0.00001
Energy	ENSCAFG00000006625	SFSWAP	< 0.00001
Energy	ENSCAFG00000001154	MRTFA	< 0.00001
Energy	ENSCAFG00000006812	TMEM132D	< 0.00001
Energy	ENSCAFG00000013221	CTNNA3	< 0.00001
Energy	ENSCAFG00000018850	HS6ST2	< 0.00001
Energy	ENSCAFG00000018564	GRIA3	1e-05
Energy	ENSCAFG00000008790	CTNNBL1	1e-05
Energy	ENSCAFG00000008211	CACNA2D3	1e-05
Energy	ENSCAFG00000018952	ARHGEF6	1e-05
Energy	ENSCAFG00000013228	CNKSR2	1e-05
Energy	ENSCAFG00000007520	CBR4	1e-05
Energy	ENSCAFG00000007586	MAST4	4e-05
Energy	ENSCAFG00000014257	PPP2R2C	4e-05
Energy	ENSCAFG00000014916	FAM227B	4e-05
Energy	ENSCAFG00000018857	GPC4	5e-05
Energy	ENSCAFG00000025529	TPK1	5e-05
Energy	ENSCAFG00000013749	CUX1	5e-05
Energy	ENSCAFG00000011082	CAMSAP2	5e-05
Energy	ENSCAFG00000038915		7e-05
Energy	ENSCAFG00000008684	SLC4A5	8e-05
Energy	ENSCAFG00000006764	PARG	0.0001
Energy	ENSCAFG00000032743		0.0001
Energy	ENSCAFG00000001234	UHRF1BP1	0.00013
Energy	ENSCAFG00000018996	CDH10	0.00013
Energy	ENSCAFG00000016531	ADGRA3	0.00014
Energy	ENSCAFG00000000557	CSNK1G3	0.00019
Energy	ENSCAFG00000000011	NFATC1	0.00019
Energy	ENSCAFG00000012098	PGBD5	0.0002
Energy	ENSCAFG00000003663	GSN	0.00024
Energy	ENSCAFG00000038846		0.00025
Energy	ENSCAFG00000029157	NOVA1	0.00033
Energy	ENSCAFG00000002028	VLDLR	0.00051
Energy	ENSCAFG00000039266		0.00056
Energy	ENSCAFG00000001425	GKAP1	0.00056
Energy	ENSCAFG00000032608	LURAP1L	0.00058
Energy	ENSCAFG00000015604	ILDR2	0.00072
Energy	ENSCAFG00000002414	AGMO	0.0008
Energy	ENSCAFG00000014454	ATM	0.00085
Energy	ENSCAFG00000008056	RYR3	0.00089
Energy	ENSCAFG00000036039		0.00091
Energy	ENSCAFG00000010355	ICE1	0.00148
Energy	ENSCAFG00000012544	COPA	0.00161
Energy	ENSCAFG00000003161	BBS9	0.00197
Energy	ENSCAFG00000001852	ADAM22	0.00285
Energy	ENSCAFG00000002640	RIMS1	0.00312
Energy	ENSCAFG00000004290	SAP130	0.00329
Energy	ENSCAFG00000012360	ALS2	0.00374
Energy	ENSCAFG00000013114	RGSL1	0.00383
Energy	ENSCAFG00000003370	ASAP2	0.00531
Energy	ENSCAFG00000002364	ADGRL3	0.00549
Energy	ENSCAFG00000013852	MATN2	0.0062
Energy	ENSCAFG00000007907	LRBA	0.00706
Energy	ENSCAFG00000008284	EXTL3	0.00806
Energy	ENSCAFG00000029142	C4H5orf51	0.00898
Energy	ENSCAFG00000033883		0.01047
Energy	ENSCAFG00000015351	BAIAP2L1	0.0105
Energy	ENSCAFG00000004479	ANO10	0.01271
Energy	ENSCAFG00000038646		0.01357
Energy	ENSCAFG00000032548	KCNH5	0.01389
Energy	ENSCAFG00000002045		0.01486
Energy	ENSCAFG00000005330	SH2D4A	0.01564
Energy	ENSCAFG00000011150	GALNT17	0.01752
Energy	ENSCAFG00000018351	ENOSF1	0.0178
Energy	ENSCAFG00000014046	RASAL2	0.01798
Energy	ENSCAFG00000028579	RTN4RL1	0.01843
Energy	ENSCAFG00000000275	NHSL1	0.02091
Energy	ENSCAFG00000002025	GCC2	0.02136
Energy	ENSCAFG00000008293	FZD3	0.02149
Energy	ENSCAFG00000003322	IFRD1	0.02301
Energy	ENSCAFG00000015422	KIAA0753	0.02326
Energy	ENSCAFG00000008039	DIP2B	0.02378
Energy	ENSCAFG00000014349	TBC1D14	0.0253
Energy	ENSCAFG00000009839	CD101	0.02885
Energy	ENSCAFG00000023072	POC1A	0.02961
Energy	ENSCAFG00000017349	STXBP4	0.03253
Energy	ENSCAFG00000018175	CAPN6	0.03302
Energy	ENSCAFG00000036812		0.04009
Energy	ENSCAFG00000007240	IPO11	0.04013
Energy	ENSCAFG00000005054	ZRANB3	0.04271
Energy	ENSCAFG00000019556	RABL6	0.04661
Energy	ENSCAFG00000013324	LRP6	0.047
Excitability	ENSCAFG00000017252	ATRX	< 0.00001
Excitability	ENSCAFG00000007650	NEK1	< 0.00001
Excitability	ENSCAFG00000038256		< 0.00001
Excitability	ENSCAFG00000005914	TMTC2	< 0.00001
Excitability	ENSCAFG00000007301	CWC27	< 0.00001
Excitability	ENSCAFG00000006732	PXDNL	< 0.00001
Excitability	ENSCAFG00000006743	PCMTD1	< 0.00001
Excitability	ENSCAFG00000004087	MAML2	< 0.00001
Excitability	ENSCAFG00000009849	SPTBN5	< 0.00001
Excitability	ENSCAFG00000013607	PDE11A	< 0.00001
Excitability	ENSCAFG00000007007	ATP8A2	< 0.00001
Excitability	ENSCAFG00000008352	PHF20	< 0.00001
Excitability	ENSCAFG00000006764	PARG	< 0.00001
Excitability	ENSCAFG00000023079	AFF3	< 0.00001
Excitability	ENSCAFG00000009662	MGA	< 0.00001
Excitability	ENSCAFG00000000070	PHLPP1	1e-05
Excitability	ENSCAFG00000014916	FAM227B	1e-05
Excitability	ENSCAFG00000004160	TNIP3	1e-05
Excitability	ENSCAFG00000024647	SERPINB5	1e-05
Excitability	ENSCAFG00000001557	CCDC171	2e-05
Excitability	ENSCAFG00000000935	CEP85L	2e-05
Excitability	ENSCAFG00000004535	NR2C2	3e-05
Excitability	ENSCAFG00000006625	SFSWAP	5e-05
Excitability	ENSCAFG00000007963	BLK	5e-05
Excitability	ENSCAFG00000000337	PPM1H	0.00011
Excitability	ENSCAFG00000005373	SLC24A3	0.00011
Excitability	ENSCAFG00000035101		0.00015
Excitability	ENSCAFG00000011212	PIK3CA	0.00015
Excitability	ENSCAFG00000005054	ZRANB3	0.00016
Excitability	ENSCAFG00000032470		0.00028
Excitability	ENSCAFG00000031780		0.00029
Excitability	ENSCAFG00000010242	SLC4A10	0.00035
Excitability	ENSCAFG00000000786	CSMD3	0.00042
Excitability	ENSCAFG00000002323	MGAT4A	0.00047
Excitability	ENSCAFG00000007379	CAMK4	0.0006
Excitability	ENSCAFG00000013228	CNKSR2	0.00074
Excitability	ENSCAFG00000001930	PGM5	0.00081
Excitability	ENSCAFG00000031499	GLIS3	0.00093
Excitability	ENSCAFG00000012890	HAT1	0.00094
Excitability	ENSCAFG00000008761	CX3CL1	0.00101
Excitability	ENSCAFG00000038846		0.00116
Excitability	ENSCAFG00000018100	SCAPER	0.0012
Excitability	ENSCAFG00000002155		0.00127
Excitability	ENSCAFG00000001314	CACNA1I	0.00133
Excitability	ENSCAFG00000018869	C5H1orf87	0.00174
Excitability	ENSCAFG00000010221	SUFU	0.00338
Excitability	ENSCAFG00000018123	ARSI	0.00363
Excitability	ENSCAFG00000015943	PRTG	0.00391
Excitability	ENSCAFG00000015648		0.00425
Excitability	ENSCAFG00000008293	FZD3	0.00524
Excitability	ENSCAFG00000003710	CRYBG1	0.00524
Excitability	ENSCAFG00000031721	CPNE1	0.00565
Excitability	ENSCAFG00000029961	APCDD1L	0.00793
Excitability	ENSCAFG00000029157	NOVA1	0.00811
Excitability	ENSCAFG00000007361	EPB41L4A	0.0086
Excitability	ENSCAFG00000040631		0.00885
Excitability	ENSCAFG00000002364	ADGRL3	0.00916
Excitability	ENSCAFG00000039209		0.01003
Excitability	ENSCAFG00000032246		0.01023
Excitability	ENSCAFG00000008058	MTMR9	0.01028
Excitability	ENSCAFG00000012179	UNC45A	0.01081
Excitability	ENSCAFG00000014454	ATM	0.01115
Excitability	ENSCAFG00000008568	AGPAT5	0.01132
Excitability	ENSCAFG00000001106	LAMA2	0.01169
Excitability	ENSCAFG00000010194	ABCC12	0.01241
Excitability	ENSCAFG00000019951	VAV3	0.01268
Excitability	ENSCAFG00000007789	ARHGAP10	0.01282
Excitability	ENSCAFG00000006555	PRKDC	0.01308
Excitability	ENSCAFG00000012413	RPS6KC1	0.0162
Excitability	ENSCAFG00000011922	KPNA1	0.01623
Excitability	ENSCAFG00000009371	SORBS3	0.01701
Excitability	ENSCAFG00000010988	CFAP410	0.01954
Excitability	ENSCAFG00000009367	HPS1	0.02013
Excitability	ENSCAFG00000020112	ABCD3	0.02145
Excitability	ENSCAFG00000032748	UBL3	0.02154
Excitability	ENSCAFG00000015932	DNAAF4	0.02275
Excitability	ENSCAFG00000011934	ARHGEF12	0.02436
Excitability	ENSCAFG00000020376	ZZZ3	0.02694
Excitability	ENSCAFG00000005140	VHL	0.0278
Excitability	ENSCAFG00000006809	NCOA4	0.0285
Excitability	ENSCAFG00000016732	SIPA1L1	0.03289
Excitability	ENSCAFG00000013823	SPECC1L	0.03439
Excitability	ENSCAFG00000036039		0.03488
Excitability	ENSCAFG00000010457	RIPOR2	0.03589
Excitability	ENSCAFG00000013506	NFE2L2	0.03625
Excitability	ENSCAFG00000031408	CFAP299	0.04039
Excitability	ENSCAFG00000000756	GRAMD4	0.0417
Excitability	ENSCAFG00000001952	2019-09-10	0.04183
Excitability	ENSCAFG00000020310	SMPD3	0.04321
Excitability	ENSCAFG00000000445	SYNE1	0.04761
Excitability	ENSCAFG00000000195	SHMT2	0.04903
Nonsocial Fear	ENSCAFG00000010026	SMARCAD1	< 0.00001
Nonsocial Fear	ENSCAFG00000005775	BIRC6	< 0.00001
Nonsocial Fear	ENSCAFG00000009227	WDR41	< 0.00001
Nonsocial Fear	ENSCAFG00000000955	TBC1D32	< 0.00001
Nonsocial Fear	ENSCAFG00000001460	PTPRD	< 0.00001
Nonsocial Fear	ENSCAFG00000033142		< 0.00001
Nonsocial Fear	ENSCAFG00000035815		< 0.00001
Nonsocial Fear	ENSCAFG00000009386	HPSE2	< 0.00001
Nonsocial Fear	ENSCAFG00000011680	ATP11B	< 0.00001
Nonsocial Fear	ENSCAFG00000034838		< 0.00001
Nonsocial Fear	ENSCAFG00000017327	BRWD3	< 0.00001
Nonsocial Fear	ENSCAFG00000006592	STK32A	< 0.00001
Nonsocial Fear	ENSCAFG00000002160	SPTLC1	< 0.00001
Nonsocial Fear	ENSCAFG00000003161	BBS9	1e-05
Nonsocial Fear	ENSCAFG00000014245	PDE1A	1e-05
Nonsocial Fear	ENSCAFG00000011936	TRPM8	1e-05
Nonsocial Fear	ENSCAFG00000017256		2e-05
Nonsocial Fear	ENSCAFG00000009764	PPHLN1	2e-05
Nonsocial Fear	ENSCAFG00000040257		3e-05
Nonsocial Fear	ENSCAFG00000006278	ATRN	4e-05
Nonsocial Fear	ENSCAFG00000004568	CUBN	4e-05
Nonsocial Fear	ENSCAFG00000018635	ROR1	6e-05
Nonsocial Fear	ENSCAFG00000012098	PGBD5	7e-05
Nonsocial Fear	ENSCAFG00000001106	LAMA2	0.00038
Nonsocial Fear	ENSCAFG00000004186		0.00039
Nonsocial Fear	ENSCAFG00000002390	FAM178B	0.00071
Nonsocial Fear	ENSCAFG00000008882	LEKR1	0.00074
Nonsocial Fear	ENSCAFG00000007420	CBFA2T2	0.0008
Nonsocial Fear	ENSCAFG00000038400		0.00095
Nonsocial Fear	ENSCAFG00000039648		0.00104
Nonsocial Fear	ENSCAFG00000023549	C9orf3	0.00131
Nonsocial Fear	ENSCAFG00000009417	CDYL	0.00133
Nonsocial Fear	ENSCAFG00000002527	LRPPRC	0.00155
Nonsocial Fear	ENSCAFG00000014030	LARS2	0.0017
Nonsocial Fear	ENSCAFG00000018100	SCAPER	0.00188
Nonsocial Fear	ENSCAFG00000004377	ACBD5	0.00284
Nonsocial Fear	ENSCAFG00000008945	SLIT1	0.00299
Nonsocial Fear	ENSCAFG00000017502	ANP32A	0.00333
Nonsocial Fear	ENSCAFG00000001697	UBR2	0.00368
Nonsocial Fear	ENSCAFG00000005720	CLPB	0.00457
Nonsocial Fear	ENSCAFG00000016982	DOCK2	0.00511
Nonsocial Fear	ENSCAFG00000017645	MYO9A	0.0052
Nonsocial Fear	ENSCAFG00000016051	CACNA1C	0.00582
Nonsocial Fear	ENSCAFG00000011430	STXBP5L	0.00728
Nonsocial Fear	ENSCAFG00000009885	JARID2	0.00936
Nonsocial Fear	ENSCAFG00000001362	PLXNA4	0.01009
Nonsocial Fear	ENSCAFG00000008630	KIFC3	0.01125
Nonsocial Fear	ENSCAFG00000017252	ATRX	0.0129
Nonsocial Fear	ENSCAFG00000009624	CWF19L1	0.01551
Nonsocial Fear	ENSCAFG00000000611	MEGF10	0.01757
Nonsocial Fear	ENSCAFG00000004432	RCBTB2	0.02036
Nonsocial Fear	ENSCAFG00000017294	P2RY10	0.0215
Nonsocial Fear	ENSCAFG00000031017	SMIM33	0.02266
Nonsocial Fear	ENSCAFG00000039348		0.02393
Nonsocial Fear	ENSCAFG00000003479		0.02646
Nonsocial Fear	ENSCAFG00000033300		0.03218
Nonsocial Fear	ENSCAFG00000001091	TGFBI	0.03699
Nonsocial Fear	ENSCAFG00000012149	ARNT	0.03708
Nonsocial Fear	ENSCAFG00000020250		0.04333
Owner Aggression	ENSCAFG00000018100	SCAPER	< 0.00001
Owner Aggression	ENSCAFG00000011983	HSPBAP1	< 0.00001
Owner Aggression	ENSCAFG00000001646	PRUNE2	< 0.00001
Owner Aggression	ENSCAFG00000015639	MNAT1	< 0.00001
Owner Aggression	ENSCAFG00000006730	TTC17	< 0.00001
Owner Aggression	ENSCAFG00000013288	ADAMTSL3	< 0.00001
Owner Aggression	ENSCAFG00000001557	CCDC171	< 0.00001
Owner Aggression	ENSCAFG00000034411		< 0.00001
Owner Aggression	ENSCAFG00000002271	PHF14	< 0.00001
Owner Aggression	ENSCAFG00000005121	SFMBT2	< 0.00001
Owner Aggression	ENSCAFG00000014257	PPP2R2C	< 0.00001
Owner Aggression	ENSCAFG00000023938	GPR158	< 0.00001
Owner Aggression	ENSCAFG00000010120	RAD54L2	< 0.00001
Owner Aggression	ENSCAFG00000016511	RFX1	< 0.00001
Owner Aggression	ENSCAFG00000003749	SLC7A11	< 0.00001
Owner Aggression	ENSCAFG00000001700	SND1	1e-05
Owner Aggression	ENSCAFG00000001630	MYH9	1e-05
Owner Aggression	ENSCAFG00000039058		1e-05
Owner Aggression	ENSCAFG00000011940	PARP9	1e-05
Owner Aggression	ENSCAFG00000004157	RAB7A	3e-05
Owner Aggression	ENSCAFG00000006989	DEFB119	3e-05
Owner Aggression	ENSCAFG00000007107	TTLL9	6e-05
Owner Aggression	ENSCAFG00000007420	CBFA2T2	9e-05
Owner Aggression	ENSCAFG00000011176	NR5A2	0.00012
Owner Aggression	ENSCAFG00000015618	TULP3	0.00028
Owner Aggression	ENSCAFG00000006462	UBXN8	0.00035
Owner Aggression	ENSCAFG00000003106	EHBP1	0.00043
Owner Aggression	ENSCAFG00000017676	SETBP1	0.00051
Owner Aggression	ENSCAFG00000000770		0.00057
Owner Aggression	ENSCAFG00000009669	MDM4	0.00059
Owner Aggression	ENSCAFG00000002714	EPHA5	0.00066
Owner Aggression	ENSCAFG00000007557	HHIP	0.0007
Owner Aggression	ENSCAFG00000004764	VWA8	0.0007
Owner Aggression	ENSCAFG00000019958	NTNG1	0.00073
Owner Aggression	ENSCAFG00000001166	KHDRBS3	0.00082
Owner Aggression	ENSCAFG00000002796	CCDC88A	0.00128
Owner Aggression	ENSCAFG00000012413	RPS6KC1	0.00161
Owner Aggression	ENSCAFG00000028804	RNF150	0.00167
Owner Aggression	ENSCAFG00000004343	EFCC1	0.002
Owner Aggression	ENSCAFG00000033917		0.00202
Owner Aggression	ENSCAFG00000031408	CFAP299	0.0033
Owner Aggression	ENSCAFG00000018777	ENOX2	0.00543
Owner Aggression	ENSCAFG00000016111	FOXK1	0.00547
Owner Aggression	ENSCAFG00000031628		0.00589
Owner Aggression	ENSCAFG00000016982	DOCK2	0.0062
Owner Aggression	ENSCAFG00000039505		0.0067
Owner Aggression	ENSCAFG00000023460	FBRSL1	0.00702
Owner Aggression	ENSCAFG00000009506	ABI3BP	0.00715
Owner Aggression	ENSCAFG00000012804	MACO1	0.00791
Owner Aggression	ENSCAFG00000000828	RPS6KA2	0.00796
Owner Aggression	ENSCAFG00000013410	RGL1	0.00833
Owner Aggression	ENSCAFG00000014718	CWF19L2	0.00951
Owner Aggression	ENSCAFG00000018136	SYT17	0.01483
Owner Aggression	ENSCAFG00000003705	CUL2	0.01765
Owner Aggression	ENSCAFG00000016200	TCF12	0.02479
Owner Aggression	ENSCAFG00000035446		0.02829
Owner Aggression	ENSCAFG00000033950		0.02862
Owner Aggression	ENSCAFG00000014599	GOLIM4	0.03051
Owner Aggression	ENSCAFG00000038128		0.031
Owner Aggression	ENSCAFG00000005433	ABCC4	0.03489
Owner Aggression	ENSCAFG00000000086	CDH20	0.03571
Owner Aggression	ENSCAFG00000037800		0.04078
Owner Aggression	ENSCAFG00000023912	LYG2	0.04435
Owner Aggression	ENSCAFG00000006492	B4GALNT4	0.0458
Owner Aggression	ENSCAFG00000000795	PDE10A	0.04811
Owner Aggression	ENSCAFG00000003570	FBXW2	0.04887
Separation Problems	ENSCAFG00000028659		< 0.00001
Separation Problems	ENSCAFG00000031499	GLIS3	< 0.00001
Separation Problems	ENSCAFG00000005746	NAV3	< 0.00001
Separation Problems	ENSCAFG00000035085		< 0.00001
Separation Problems	ENSCAFG00000011820	PRPF3	< 0.00001
Separation Problems	ENSCAFG00000017685	RIT2	< 0.00001
Separation Problems	ENSCAFG00000002096	UXS1	< 0.00001
Separation Problems	ENSCAFG00000015459		< 0.00001
Separation Problems	ENSCAFG00000000745	TBC1D22A	< 0.00001
Separation Problems	ENSCAFG00000015477		< 0.00001
Separation Problems	ENSCAFG00000036551		< 0.00001
Separation Problems	ENSCAFG00000009318	CCDC148	< 0.00001
Separation Problems	ENSCAFG00000000756	GRAMD4	< 0.00001
Separation Problems	ENSCAFG00000019132	RPH3AL	< 0.00001
Separation Problems	ENSCAFG00000002413	DST	< 0.00001
Separation Problems	ENSCAFG00000004087	MAML2	< 0.00001
Separation Problems	ENSCAFG00000013221	CTNNA3	1e-05
Separation Problems	ENSCAFG00000014975	EIF4G3	2e-05
Separation Problems	ENSCAFG00000017765	GRIA1	2e-05
Separation Problems	ENSCAFG00000010120	RAD54L2	2e-05
Separation Problems	ENSCAFG00000003570	FBXW2	3e-05
Separation Problems	ENSCAFG00000040856		3e-05
Separation Problems	ENSCAFG00000008827	ALMS1	4e-05
Separation Problems	ENSCAFG00000033314		5e-05
Separation Problems	ENSCAFG00000016354	STIM2	8e-05
Separation Problems	ENSCAFG00000004545	TRDMT1	9e-05
Separation Problems	ENSCAFG00000000334	ADAMTS2	0.00012
Separation Problems	ENSCAFG00000006762	ST18	0.00012
Separation Problems	ENSCAFG00000036684		0.00014
Separation Problems	ENSCAFG00000016568	ADAM10	0.00015
Separation Problems	ENSCAFG00000000767	CELSR1	0.00017
Separation Problems	ENSCAFG00000005270	CFAP61	0.00018
Separation Problems	ENSCAFG00000018100	SCAPER	0.00021
Separation Problems	ENSCAFG00000005720	CLPB	0.00048
Separation Problems	ENSCAFG00000020243	ZFHX3	0.00054
Separation Problems	ENSCAFG00000013410	RGL1	0.00059
Separation Problems	ENSCAFG00000002762	EML6	0.0006
Separation Problems	ENSCAFG00000010026	SMARCAD1	0.00155
Separation Problems	ENSCAFG00000000945	MAN1A1	0.00165
Separation Problems	ENSCAFG00000006103	NEK11	0.00188
Separation Problems	ENSCAFG00000009831	PRMT3	0.00217
Separation Problems	ENSCAFG00000016511	RFX1	0.00241
Separation Problems	ENSCAFG00000009799	NCAPD3	0.00287
Separation Problems	ENSCAFG00000004388		0.00302
Separation Problems	ENSCAFG00000006042	SLC23A2	0.00306
Separation Problems	ENSCAFG00000023562	DMD	0.00447
Separation Problems	ENSCAFG00000016588	C20H19orf57	0.00457
Separation Problems	ENSCAFG00000008413	EPB41L1	0.00469
Separation Problems	ENSCAFG00000015742		0.005
Separation Problems	ENSCAFG00000004092	MTMR2	0.00538
Separation Problems	ENSCAFG00000015686		0.00551
Separation Problems	ENSCAFG00000017787		0.00609
Separation Problems	ENSCAFG00000039437		0.00624
Separation Problems	ENSCAFG00000013503	DGKG	0.00638
Separation Problems	ENSCAFG00000007098	CYP7A1	0.00798
Separation Problems	ENSCAFG00000015862	FAM214A	0.00966
Separation Problems	ENSCAFG00000031536	LDLRAD4	0.00974
Separation Problems	ENSCAFG00000001161	OBSCN	0.0102
Separation Problems	ENSCAFG00000010377		0.01089
Separation Problems	ENSCAFG00000002091	RCL1	0.01155
Separation Problems	ENSCAFG00000014112	KIF15	0.01505
Separation Problems	ENSCAFG00000008340	RACGAP1	0.01538
Separation Problems	ENSCAFG00000040770		0.01554
Separation Problems	ENSCAFG00000012545	CARF	0.01637
Separation Problems	ENSCAFG00000013052	TANC2	0.01691
Separation Problems	ENSCAFG00000031802	ISPD	0.01759
Separation Problems	ENSCAFG00000016310	IKZF3	0.01778
Separation Problems	ENSCAFG00000008846	FBXO41	0.01929
Separation Problems	ENSCAFG00000006520	KCNG3	0.01959
Separation Problems	ENSCAFG00000008285	HNF4G	0.01972
Separation Problems	ENSCAFG00000006812	TMEM132D	0.02037
Separation Problems	ENSCAFG00000016449		0.02209
Separation Problems	ENSCAFG00000004057	SRPK2	0.02229
Separation Problems	ENSCAFG00000011585	PCNX2	0.02251
Separation Problems	ENSCAFG00000006668	KBTBD8	0.02547
Separation Problems	ENSCAFG00000032790		0.02612
Separation Problems	ENSCAFG00000006743	PCMTD1	0.02651
Separation Problems	ENSCAFG00000002467	SNX13	0.03089
Separation Problems	ENSCAFG00000020112	ABCD3	0.0313
Separation Problems	ENSCAFG00000010881	IGF1R	0.03273
Separation Problems	ENSCAFG00000028595		0.03568
Separation Problems	ENSCAFG00000013863	CEMIP	0.03909
Separation Problems	ENSCAFG00000018323	ABLIM3	0.03934
Separation Problems	ENSCAFG00000002257	ICA1	0.04353
Separation Problems	ENSCAFG00000013375	EFCAB3	0.04558
Separation Problems	ENSCAFG00000007568	CPA6	0.04727
Stranger Aggression	ENSCAFG00000000079	RELCH	< 0.00001
Stranger Aggression	ENSCAFG00000003678	CCNY	< 0.00001
Stranger Aggression	ENSCAFG00000004408	CAB39L	< 0.00001
Stranger Aggression	ENSCAFG00000004341	SETDB2	< 0.00001
Stranger Aggression	ENSCAFG00000009971	ARMH3	< 0.00001
Stranger Aggression	ENSCAFG00000004325	KPNA3	< 0.00001
Stranger Aggression	ENSCAFG00000031429	GNA14	< 0.00001
Stranger Aggression	ENSCAFG00000004379	FNDC3A	< 0.00001
Stranger Aggression	ENSCAFG00000003737	PARD3	< 0.00001
Stranger Aggression	ENSCAFG00000004478	LRCH1	< 0.00001
Stranger Aggression	ENSCAFG00000002257	ICA1	< 0.00001
Stranger Aggression	ENSCAFG00000004436	RB1	< 0.00001
Stranger Aggression	ENSCAFG00000005667	NEK10	< 0.00001
Stranger Aggression	ENSCAFG00000001560	KIF6	< 0.00001
Stranger Aggression	ENSCAFG00000013410	RGL1	< 0.00001
Stranger Aggression	ENSCAFG00000014030	LARS2	< 0.00001
Stranger Aggression	ENSCAFG00000000353	STXBP5	< 0.00001
Stranger Aggression	ENSCAFG00000003705	CUL2	< 0.00001
Stranger Aggression	ENSCAFG00000005954	SUMF1	< 0.00001
Stranger Aggression	ENSCAFG00000035101		< 0.00001
Stranger Aggression	ENSCAFG00000005707	OSBPL8	< 0.00001
Stranger Aggression	ENSCAFG00000001557	CCDC171	< 0.00001
Stranger Aggression	ENSCAFG00000005040	KLF12	< 0.00001
Stranger Aggression	ENSCAFG00000002364	ADGRL3	1e-05
Stranger Aggression	ENSCAFG00000000637	SLC12A2	1e-05
Stranger Aggression	ENSCAFG00000004345	RCBTB1	2e-05
Stranger Aggression	ENSCAFG00000011415	MCUB	2e-05
Stranger Aggression	ENSCAFG00000006103	NEK11	0.00021
Stranger Aggression	ENSCAFG00000005326	UVRAG	0.00027
Stranger Aggression	ENSCAFG00000020058	SNX7	0.00037
Stranger Aggression	ENSCAFG00000005175	SCEL	0.00081
Stranger Aggression	ENSCAFG00000024856	KPNA4	0.00118
Stranger Aggression	ENSCAFG00000000677	LRP12	0.0013
Stranger Aggression	ENSCAFG00000018920	CLEC16A	0.00157
Stranger Aggression	ENSCAFG00000009506	ABI3BP	0.00163
Stranger Aggression	ENSCAFG00000007235	HIPK3	0.00194
Stranger Aggression	ENSCAFG00000017685	RIT2	0.00204
Stranger Aggression	ENSCAFG00000013966	CPS1	0.00206
Stranger Aggression	ENSCAFG00000010984	VTI1A	0.00216
Stranger Aggression	ENSCAFG00000001286	FANCC	0.00303
Stranger Aggression	ENSCAFG00000004337	EBPL	0.00342
Stranger Aggression	ENSCAFG00000001738	GRM8	0.00355
Stranger Aggression	ENSCAFG00000004764	VWA8	0.00476
Stranger Aggression	ENSCAFG00000038544		0.00496
Stranger Aggression	ENSCAFG00000005838	PCCA	0.0072
Stranger Aggression	ENSCAFG00000003860	MFSD8	0.00724
Stranger Aggression	ENSCAFG00000002271	PHF14	0.01045
Stranger Aggression	ENSCAFG00000010942	CCDC91	0.0112
Stranger Aggression	ENSCAFG00000006431	LARS	0.01191
Stranger Aggression	ENSCAFG00000040913		0.01192
Stranger Aggression	ENSCAFG00000000507	VPS13B	0.01201
Stranger Aggression	ENSCAFG00000039466		0.01361
Stranger Aggression	ENSCAFG00000037402		0.01439
Stranger Aggression	ENSCAFG00000024350	CENPP	0.01692
Stranger Aggression	ENSCAFG00000005746	NAV3	0.02133
Stranger Aggression	ENSCAFG00000001635	MLLT3	0.02134
Stranger Aggression	ENSCAFG00000030242	HS3ST2	0.03211
Stranger Aggression	ENSCAFG00000035258		0.04196
Stranger Fear	ENSCAFG00000003929	COG5	< 0.00001
Stranger Fear	ENSCAFG00000011082	CAMSAP2	< 0.00001
Stranger Fear	ENSCAFG00000001434	KDM4C	< 0.00001
Stranger Fear	ENSCAFG00000018024	TRAPPC8	< 0.00001
Stranger Fear	ENSCAFG00000002257	ICA1	< 0.00001
Stranger Fear	ENSCAFG00000031429	GNA14	< 0.00001
Stranger Fear	ENSCAFG00000000693	ANGPT1	< 0.00001
Stranger Fear	ENSCAFG00000034027		1e-05
Stranger Fear	ENSCAFG00000013221	CTNNA3	1e-05
Stranger Fear	ENSCAFG00000006462	UBXN8	1e-05
Stranger Fear	ENSCAFG00000014030	LARS2	1e-05
Stranger Fear	ENSCAFG00000015131	CEP126	3e-05
Stranger Fear	ENSCAFG00000013671	EFL1	3e-05
Stranger Fear	ENSCAFG00000004568	CUBN	7e-05
Stranger Fear	ENSCAFG00000015679	RGS7	0.00012
Stranger Fear	ENSCAFG00000003153	VPS54	0.00027
Stranger Fear	ENSCAFG00000023938	GPR158	0.00029
Stranger Fear	ENSCAFG00000010811	LRRC28	0.00031
Stranger Fear	ENSCAFG00000017227	GABRG2	0.00051
Stranger Fear	ENSCAFG00000000337	PPM1H	0.00064
Stranger Fear	ENSCAFG00000009159	TRIO	0.00068
Stranger Fear	ENSCAFG00000002546	CAMKMT	0.00072
Stranger Fear	ENSCAFG00000009280	PTPRT	0.00079
Stranger Fear	ENSCAFG00000015967	MTHFD1	0.00116
Stranger Fear	ENSCAFG00000019296	METTL16	0.00143
Stranger Fear	ENSCAFG00000006103	NEK11	0.00163
Stranger Fear	ENSCAFG00000035420		0.00166
Stranger Fear	ENSCAFG00000009893	DTNBP1	0.0025
Stranger Fear	ENSCAFG00000010766	TESMIN	0.00295
Stranger Fear	ENSCAFG00000032631		0.0032
Stranger Fear	ENSCAFG00000035085		0.00532
Stranger Fear	ENSCAFG00000002552	INVS	0.00724
Stranger Fear	ENSCAFG00000003995	FYN	0.00727
Stranger Fear	ENSCAFG00000016732	SIPA1L1	0.00989
Stranger Fear	ENSCAFG00000008738	TM9SF3	0.01119
Stranger Fear	ENSCAFG00000000974	DERL1	0.02366
Stranger Fear	ENSCAFG00000017314	MBTD1	0.02656
Stranger Fear	ENSCAFG00000003582	VPS41	0.02675
Stranger Fear	ENSCAFG00000018267	TOP3A	0.02676
Stranger Fear	ENSCAFG00000005720	CLPB	0.03352
Stranger Fear	ENSCAFG00000004408	CAB39L	0.04276
Stranger Fear	ENSCAFG00000019735	PIK3CD	0.04406
Stranger Fear	ENSCAFG00000035409		0.0448
Stranger Fear	ENSCAFG00000004855	EPB41L5	0.04492
Stranger Fear	ENSCAFG00000020154	EVI5	0.04926
Touch Sensitivity	ENSCAFG00000006013	CNTN4	< 0.00001
Touch Sensitivity	ENSCAFG00000002796	CCDC88A	< 0.00001
Touch Sensitivity	ENSCAFG00000017362	NUP210L	< 0.00001
Touch Sensitivity	ENSCAFG00000015625	FMN2	< 0.00001
Touch Sensitivity	ENSCAFG00000028659		< 0.00001
Touch Sensitivity	ENSCAFG00000000696	RSPO2	< 0.00001
Touch Sensitivity	ENSCAFG00000002762	EML6	< 0.00001
Touch Sensitivity	ENSCAFG00000005720	CLPB	< 0.00001
Touch Sensitivity	ENSCAFG00000017248	UBAP2L	< 0.00001
Touch Sensitivity	ENSCAFG00000025531		< 0.00001
Touch Sensitivity	ENSCAFG00000036746		< 0.00001
Touch Sensitivity	ENSCAFG00000010355	ICE1	1e-05
Touch Sensitivity	ENSCAFG00000017645	MYO9A	1e-05
Touch Sensitivity	ENSCAFG00000005916	ANKRD28	1e-05
Touch Sensitivity	ENSCAFG00000005998	LHFPL6	2e-05
Touch Sensitivity	ENSCAFG00000002661	SMC2	3e-05
Touch Sensitivity	ENSCAFG00000023460	FBRSL1	3e-05
Touch Sensitivity	ENSCAFG00000008185	ARFIP1	4e-05
Touch Sensitivity	ENSCAFG00000000737	CDC42SE2	4e-05
Touch Sensitivity	ENSCAFG00000011585	PCNX2	4e-05
Touch Sensitivity	ENSCAFG00000035409		4e-05
Touch Sensitivity	ENSCAFG00000005775	BIRC6	0.0001
Touch Sensitivity	ENSCAFG00000000884	WDR27	0.00017
Touch Sensitivity	ENSCAFG00000018665	POLDIP2	0.00027
Touch Sensitivity	ENSCAFG00000018663	TNFAIP1	0.0003
Touch Sensitivity	ENSCAFG00000017651	DNM2	0.00031
Touch Sensitivity	ENSCAFG00000007822	BDP1	0.00032
Touch Sensitivity	ENSCAFG00000017598	SHISA6	0.00042
Touch Sensitivity	ENSCAFG00000032632	WNT7A	0.00048
Touch Sensitivity	ENSCAFG00000017606	UNC79	0.00049
Touch Sensitivity	ENSCAFG00000006520	KCNG3	0.00049
Touch Sensitivity	ENSCAFG00000001173	FAM135B	0.00056
Touch Sensitivity	ENSCAFG00000033474		0.0006
Touch Sensitivity	ENSCAFG00000018564	GRIA3	0.00071
Touch Sensitivity	ENSCAFG00000000569	ZNF608	0.00076
Touch Sensitivity	ENSCAFG00000038398		0.00079
Touch Sensitivity	ENSCAFG00000010682	SP110	0.00116
Touch Sensitivity	ENSCAFG00000005600	TASP1	0.0012
Touch Sensitivity	ENSCAFG00000020112	ABCD3	0.00143
Touch Sensitivity	ENSCAFG00000003479		0.00163
Touch Sensitivity	ENSCAFG00000035085		0.0019
Touch Sensitivity	ENSCAFG00000012564	PIK3C2G	0.00244
Touch Sensitivity	ENSCAFG00000018591	ARHGAP28	0.00399
Touch Sensitivity	ENSCAFG00000002753	GPNMB	0.00434
Touch Sensitivity	ENSCAFG00000034887		0.00449
Touch Sensitivity	ENSCAFG00000005403	LRP1B	0.00476
Touch Sensitivity	ENSCAFG00000008319	CHODL	0.00542
Touch Sensitivity	ENSCAFG00000018890	TXNDC11	0.00597
Touch Sensitivity	ENSCAFG00000007149	FBLN7	0.0066
Touch Sensitivity	ENSCAFG00000031628		0.00691
Touch Sensitivity	ENSCAFG00000000828	RPS6KA2	0.00702
Touch Sensitivity	ENSCAFG00000016310	IKZF3	0.00771
Touch Sensitivity	ENSCAFG00000010897	ARHGEF38	0.00779
Touch Sensitivity	ENSCAFG00000024183		0.01036
Touch Sensitivity	ENSCAFG00000036101		0.01153
Touch Sensitivity	ENSCAFG00000006050	MYO16	0.01334
Touch Sensitivity	ENSCAFG00000010229	DOCK3	0.0151
Touch Sensitivity	ENSCAFG00000010484	PKP2	0.01543
Touch Sensitivity	ENSCAFG00000004130	NEBL	0.01612
Touch Sensitivity	ENSCAFG00000017197	ATP8B2	0.01619
Touch Sensitivity	ENSCAFG00000000719	NUDCD1	0.01641
Touch Sensitivity	ENSCAFG00000015162	KTN1	0.0177
Touch Sensitivity	ENSCAFG00000010476	NOTCH2	0.01791
Touch Sensitivity	ENSCAFG00000030884	APOPT1	0.01819
Touch Sensitivity	ENSCAFG00000000068	BCL2	0.01831
Touch Sensitivity	ENSCAFG00000001700	SND1	0.01904
Touch Sensitivity	ENSCAFG00000005904	FEZ2	0.01921
Touch Sensitivity	ENSCAFG00000030928		0.01949
Touch Sensitivity	ENSCAFG00000004454	SUCLA2	0.02121
Touch Sensitivity	ENSCAFG00000004249	ARHGAP21	0.02171
Touch Sensitivity	ENSCAFG00000008744	RASGRF2	0.02172
Touch Sensitivity	ENSCAFG00000018100	SCAPER	0.02322
Touch Sensitivity	ENSCAFG00000009227	WDR41	0.02445
Touch Sensitivity	ENSCAFG00000009218	MORN4	0.02484
Touch Sensitivity	ENSCAFG00000000226	HBS1L	0.02568
Touch Sensitivity	ENSCAFG00000002527	LRPPRC	0.0279
Touch Sensitivity	ENSCAFG00000009033	DYSF	0.03512
Touch Sensitivity	ENSCAFG00000009322	DNAJC17	0.03748
Touch Sensitivity	ENSCAFG00000009021	SEC31A	0.03798
Touch Sensitivity	ENSCAFG00000003471	PNISR	0.03828
Touch Sensitivity	ENSCAFG00000009831	PRMT3	0.04837
Touch Sensitivity	ENSCAFG00000014257	PPP2R2C	0.04866
Trainability	ENSCAFG00000018564	GRIA3	< 0.00001
Trainability	ENSCAFG00000014257	PPP2R2C	< 0.00001
Trainability	ENSCAFG00000007420	CBFA2T2	< 0.00001
Trainability	ENSCAFG00000000011	NFATC1	< 0.00001
Trainability	ENSCAFG00000029157	NOVA1	< 0.00001
Trainability	ENSCAFG00000004545	TRDMT1	< 0.00001
Trainability	ENSCAFG00000018849	SNX29	< 0.00001
Trainability	ENSCAFG00000037352		< 0.00001
Trainability	ENSCAFG00000003373	DGKI	< 0.00001
Trainability	ENSCAFG00000000133	WDR7	< 0.00001
Trainability	ENSCAFG00000009912	ERG	< 0.00001
Trainability	ENSCAFG00000000522	SNCAIP	< 0.00001
Trainability	ENSCAFG00000000353	STXBP5	< 0.00001
Trainability	ENSCAFG00000001700	SND1	< 0.00001
Trainability	ENSCAFG00000039561		< 0.00001
Trainability	ENSCAFG00000008211	CACNA2D3	< 0.00001
Trainability	ENSCAFG00000028708	SCD5	< 0.00001
Trainability	ENSCAFG00000018972	EFCAB5	1e-05
Trainability	ENSCAFG00000015351	BAIAP2L1	1e-05
Trainability	ENSCAFG00000032743		1e-05
Trainability	ENSCAFG00000013852	MATN2	1e-05
Trainability	ENSCAFG00000010692	USF3	1e-05
Trainability	ENSCAFG00000034669		2e-05
Trainability	ENSCAFG00000009081	EPHA6	2e-05
Trainability	ENSCAFG00000035434		5e-05
Trainability	ENSCAFG00000004157	RAB7A	5e-05
Trainability	ENSCAFG00000005949	HACL1	6e-05
Trainability	ENSCAFG00000000745	TBC1D22A	7e-05
Trainability	ENSCAFG00000008333	TMEM161B	8e-05
Trainability	ENSCAFG00000005326	UVRAG	0.00015
Trainability	ENSCAFG00000005849	TBC1D5	0.00017
Trainability	ENSCAFG00000009052	LIN54	0.00032
Trainability	ENSCAFG00000025531		0.00039
Trainability	ENSCAFG00000000012	ATP9B	0.00046
Trainability	ENSCAFG00000011266	TDRD1	0.00055
Trainability	ENSCAFG00000011725	ATRNL1	0.00061
Trainability	ENSCAFG00000003651	CSMD2	0.0008
Trainability	ENSCAFG00000000582	GRAMD2B	0.0013
Trainability	ENSCAFG00000014755	SAMD7	0.00141
Trainability	ENSCAFG00000008199	FMN1	0.00146
Trainability	ENSCAFG00000009595	PKD2	0.00162
Trainability	ENSCAFG00000030938		0.00196
Trainability	ENSCAFG00000006989	DEFB119	0.00231
Trainability	ENSCAFG00000032255	RNF175	0.00295
Trainability	ENSCAFG00000001425	GKAP1	0.00315
Trainability	ENSCAFG00000007557	HHIP	0.00319
Trainability	ENSCAFG00000016024	FBXL18	0.00324
Trainability	ENSCAFG00000012544	COPA	0.00386
Trainability	ENSCAFG00000015742		0.00397
Trainability	ENSCAFG00000002025	GCC2	0.00431
Trainability	ENSCAFG00000010235	ARHGAP32	0.00436
Trainability	ENSCAFG00000006266	ARHGAP26	0.00437
Trainability	ENSCAFG00000013288	ADAMTSL3	0.00443
Trainability	ENSCAFG00000002023	RCAN2	0.0048
Trainability	ENSCAFG00000017514	PCDH19	0.00567
Trainability	ENSCAFG00000014358	CASK	0.00583
Trainability	ENSCAFG00000030561		0.00664
Trainability	ENSCAFG00000014045	LRRC20	0.00789
Trainability	ENSCAFG00000025514	C28H10orf53	0.00839
Trainability	ENSCAFG00000018024	TRAPPC8	0.00855
Trainability	ENSCAFG00000000637	SLC12A2	0.00941
Trainability	ENSCAFG00000008851	HECTD4	0.01054
Trainability	ENSCAFG00000019030	ABAT	0.01085
Trainability	ENSCAFG00000010827	TTC23	0.01173
Trainability	ENSCAFG00000000507	VPS13B	0.0125
Trainability	ENSCAFG00000018267	TOP3A	0.01292
Trainability	ENSCAFG00000014001	TOGARAM1	0.01334
Trainability	ENSCAFG00000011571	SOX5	0.01347
Trainability	ENSCAFG00000007837	KNTC1	0.01539
Trainability	ENSCAFG00000005056	SCN10A	0.01553
Trainability	ENSCAFG00000002414	AGMO	0.0158
Trainability	ENSCAFG00000005839	SATB1	0.01582
Trainability	ENSCAFG00000011796	MCF2L2	0.01586
Trainability	ENSCAFG00000011940	PARP9	0.01591
Trainability	ENSCAFG00000010996	CCDC15	0.01715
Trainability	ENSCAFG00000005180	MRPL33	0.01773
Trainability	ENSCAFG00000023072	POC1A	0.02154
Trainability	ENSCAFG00000010120	RAD54L2	0.02275
Trainability	ENSCAFG00000036166		0.02371
Trainability	ENSCAFG00000025069	GABRA2	0.02435
Trainability	ENSCAFG00000023015	SERPINB12	0.02527
Trainability	ENSCAFG00000010457	RIPOR2	0.02644
Trainability	ENSCAFG00000014108	OSBPL1A	0.0265
Trainability	ENSCAFG00000016511	RFX1	0.02901
Trainability	ENSCAFG00000015716	RAC1	0.02917
Trainability	ENSCAFG00000000867	RAD50	0.02983
Trainability	ENSCAFG00000035103		0.02999
Trainability	ENSCAFG00000010879	IGSF11	0.03246
Trainability	ENSCAFG00000033950		0.03426
Trainability	ENSCAFG00000039224		0.0348
Trainability	ENSCAFG00000004475	IWS1	0.03531
Trainability	ENSCAFG00000003422	GRB10	0.03998
Trainability	ENSCAFG00000002255	ICK	0.04328
Trainability	ENSCAFG00000006462	UBXN8	0.04686
Trainability	ENSCAFG00000013170	VPS8	0.04833
Trainability	ENSCAFG00000009146	RBM19	0.04899

## Sheet: Table S6
Table S6. Significant Gene Ontology (GO) terms from enrichment analyses using SNPs in the gene to derive gene-level p values (meta-analysis, Fisher’s method).
Behavioral Trait	GO ID	Term	p value
Attach & Atn Seeking	GO:0090307	mitotic spindle assembly	0.00026
Attach & Atn Seeking	GO:0060047	heart contraction	0.0016
Attach & Atn Seeking	GO:0055117	regulation of cardiac muscle contraction	0.00275
Attach & Atn Seeking	GO:0007178	transmembrane receptor protein serine/th...	0.00303
Attach & Atn Seeking	GO:0086001	cardiac muscle cell action potential	0.00303
Attach & Atn Seeking	GO:0006914	autophagy	0.00324
Attach & Atn Seeking	GO:0048172	regulation of short-term neuronal synapt...	0.00334
Attach & Atn Seeking	GO:0071467	cellular response to pH	0.00449
Attach & Atn Seeking	GO:0071322	cellular response to carbohydrate stimul...	0.0059
Attach & Atn Seeking	GO:0030162	regulation of proteolysis	0.00597
Attach & Atn Seeking	GO:0016079	synaptic vesicle exocytosis	0.00732
Attach & Atn Seeking	GO:0042417	dopamine metabolic process	0.00741
Attach & Atn Seeking	GO:0010955	negative regulation of protein processin...	0.00922
Attach & Atn Seeking	GO:0014706	striated muscle tissue development	0.00936
Attach & Atn Seeking	GO:0033173	calcineurin-NFAT signaling cascade	0.00958
Attach & Atn Seeking	GO:0015872	dopamine transport	0.00964
Attach & Atn Seeking	GO:0008219	cell death	0.00968
Attach & Atn Seeking	GO:0035235	ionotropic glutamate receptor signaling ...	0.01125
Attach & Atn Seeking	GO:0043547	positive regulation of GTPase activity	0.01177
Attach & Atn Seeking	GO:0007422	peripheral nervous system development	0.01332
Attach & Atn Seeking	GO:0008608	attachment of spindle microtubules to ki...	0.01352
Attach & Atn Seeking	GO:0019228	neuronal action potential	0.01352
Attach & Atn Seeking	GO:0042692	muscle cell differentiation	0.0136
Attach & Atn Seeking	GO:0031349	positive regulation of defense response	0.01445
Attach & Atn Seeking	GO:0032467	positive regulation of cytokinesis	0.0218
Attach & Atn Seeking	GO:0090630	activation of GTPase activity	0.02338
Attach & Atn Seeking	GO:0034198	cellular response to amino acid starvati...	0.02505
Attach & Atn Seeking	GO:0006623	protein targeting to vacuole	0.02529
Attach & Atn Seeking	GO:1901652	response to peptide	0.02572
Attach & Atn Seeking	GO:0006874	cellular calcium ion homeostasis	0.02925
Attach & Atn Seeking	GO:0048856	anatomical structure development	0.03026
Attach & Atn Seeking	GO:0048488	synaptic vesicle endocytosis	0.03228
Attach & Atn Seeking	GO:0006366	transcription by RNA polymerase II	0.03257
Attach & Atn Seeking	GO:0001893	maternal placenta development	0.03915
Attach & Atn Seeking	GO:0002093	auditory receptor cell morphogenesis	0.03915
Attach & Atn Seeking	GO:0003081	regulation of systemic arterial blood pr...	0.03915
Attach & Atn Seeking	GO:0008272	sulfate transport	0.03915
Attach & Atn Seeking	GO:0051930	regulation of sensory perception of pain	0.03915
Attach & Atn Seeking	GO:0071498	cellular response to fluid shear stress	0.03915
Attach & Atn Seeking	GO:0071786	endoplasmic reticulum tubular network or...	0.03915
Attach & Atn Seeking	GO:2000145	regulation of cell motility	0.03966
Attach & Atn Seeking	GO:0006890	retrograde vesicle-mediated transport, G...	0.04049
Attach & Atn Seeking	GO:0030154	cell differentiation	0.04213
Attach & Atn Seeking	GO:0010613	positive regulation of cardiac muscle hy...	0.04685
Attach & Atn Seeking	GO:0016486	peptide hormone processing	0.04685
Attach & Atn Seeking	GO:0048791	calcium ion-regulated exocytosis of neur...	0.04685
Attach & Atn Seeking	GO:0051457	maintenance of protein location in nucle...	0.04685
Attach & Atn Seeking	GO:1901673	regulation of mitotic spindle assembly	0.04685
Attach & Atn Seeking	GO:0071356	cellular response to tumor necrosis fact...	0.0486
Attach & Atn Seeking	GO:0032456	endocytic recycling	0.04965
Attach & Atn Seeking	GO:0090502	RNA phosphodiester bond hydrolysis, endo...	0.04965
Chasing	GO:0006886	intracellular protein transport	0.00097
Chasing	GO:0021680	cerebellar Purkinje cell layer developme...	0.00191
Chasing	GO:0060271	cilium assembly	0.002
Chasing	GO:0072283	metanephric renal vesicle morphogenesis	0.00391
Chasing	GO:0001755	neural crest cell migration	0.00617
Chasing	GO:0048278	vesicle docking	0.0068
Chasing	GO:0031648	protein destabilization	0.00696
Chasing	GO:0071526	semaphorin-plexin signaling pathway	0.00813
Chasing	GO:0035335	peptidyl-tyrosine dephosphorylation	0.0094
Chasing	GO:0007423	sensory organ development	0.01049
Chasing	GO:0050919	negative chemotaxis	0.0124
Chasing	GO:0001662	behavioral fear response	0.01569
Chasing	GO:1903146	regulation of autophagy of mitochondrion	0.01573
Chasing	GO:0042147	retrograde transport, endosome to Golgi	0.01613
Chasing	GO:0001764	neuron migration	0.01872
Chasing	GO:0061098	positive regulation of protein tyrosine ...	0.02
Chasing	GO:0007187	G protein-coupled receptor signaling pat...	0.02162
Chasing	GO:0048843	negative regulation of axon extension in...	0.02175
Chasing	GO:0051056	regulation of small GTPase mediated sign...	0.02175
Chasing	GO:0001676	long-chain fatty acid metabolic process	0.02468
Chasing	GO:0006887	exocytosis	0.02499
Chasing	GO:0045739	positive regulation of DNA repair	0.02509
Chasing	GO:0001569	branching involved in blood vessel morph...	0.0252
Chasing	GO:0003382	epithelial cell morphogenesis	0.0252
Chasing	GO:2001240	negative regulation of extrinsic apoptot...	0.0252
Chasing	GO:0060047	heart contraction	0.02803
Chasing	GO:0034030	ribonucleoside bisphosphate biosynthetic...	0.02809
Chasing	GO:0034033	purine nucleoside bisphosphate biosynthe...	0.02809
Chasing	GO:0043279	response to alkaloid	0.03291
Chasing	GO:0048880	sensory system development	0.03355
Chasing	GO:0003013	circulatory system process	0.03382
Chasing	GO:0001706	endoderm formation	0.03389
Chasing	GO:0050863	regulation of T cell activation	0.03407
Chasing	GO:2001259	positive regulation of cation channel ac...	0.03717
Chasing	GO:0010811	positive regulation of cell-substrate ad...	0.0373
Chasing	GO:0098742	cell-cell adhesion via plasma-membrane a...	0.04145
Chasing	GO:0043547	positive regulation of GTPase activity	0.0418
Chasing	GO:0051384	response to glucocorticoid	0.04322
Chasing	GO:0015936	coenzyme A metabolic process	0.04332
Chasing	GO:0021930	cerebellar granule cell precursor prolif...	0.04332
Chasing	GO:0032656	regulation of interleukin-13 production	0.04332
Chasing	GO:0035269	protein O-linked mannosylation	0.04332
Chasing	GO:0035337	fatty-acyl-CoA metabolic process	0.04332
Chasing	GO:0048311	mitochondrion distribution	0.04332
Chasing	GO:0051151	negative regulation of smooth muscle cel...	0.04332
Chasing	GO:0055074	calcium ion homeostasis	0.04338
Chasing	GO:0007600	sensory perception	0.04361
Chasing	GO:0022407	regulation of cell-cell adhesion	0.04379
Chasing	GO:0071805	potassium ion transmembrane transport	0.04574
Chasing	GO:0030858	positive regulation of epithelial cell d...	0.0465
Dog Aggression	GO:0001541	ovarian follicle development	0.00081
Dog Aggression	GO:0060415	muscle tissue morphogenesis	0.00292
Dog Aggression	GO:0045880	positive regulation of smoothened signal...	0.00324
Dog Aggression	GO:0007030	Golgi organization	0.00377
Dog Aggression	GO:0051497	negative regulation of stress fiber asse...	0.00434
Dog Aggression	GO:0060628	regulation of ER to Golgi vesicle-mediat...	0.00434
Dog Aggression	GO:1904031	positive regulation of cyclin-dependent ...	0.00434
Dog Aggression	GO:0043393	regulation of protein binding	0.00471
Dog Aggression	GO:0006890	retrograde vesicle-mediated transport, G...	0.00644
Dog Aggression	GO:0035914	skeletal muscle cell differentiation	0.00644
Dog Aggression	GO:0050680	negative regulation of epithelial cell p...	0.00662
Dog Aggression	GO:0045724	positive regulation of cilium assembly	0.00718
Dog Aggression	GO:1903671	negative regulation of sprouting angioge...	0.00718
Dog Aggression	GO:1905314	semi-lunar valve development	0.00718
Dog Aggression	GO:0060045	positive regulation of cardiac muscle ce...	0.00893
Dog Aggression	GO:0032774	RNA biosynthetic process	0.00926
Dog Aggression	GO:0051057	positive regulation of small GTPase medi...	0.00937
Dog Aggression	GO:0010799	regulation of peptidyl-threonine phospho...	0.00942
Dog Aggression	GO:0035195	gene silencing by miRNA	0.00945
Dog Aggression	GO:0034333	adherens junction assembly	0.00948
Dog Aggression	GO:0006487	protein N-linked glycosylation	0.00987
Dog Aggression	GO:0015012	heparan sulfate proteoglycan biosyntheti...	0.0109
Dog Aggression	GO:0045747	positive regulation of Notch signaling p...	0.01311
Dog Aggression	GO:0035307	positive regulation of protein dephospho...	0.01555
Dog Aggression	GO:0043537	negative regulation of blood vessel endo...	0.01555
Dog Aggression	GO:0021987	cerebral cortex development	0.01601
Dog Aggression	GO:0045787	positive regulation of cell cycle	0.01603
Dog Aggression	GO:0045666	positive regulation of neuron differenti...	0.01631
Dog Aggression	GO:0014015	positive regulation of gliogenesis	0.01823
Dog Aggression	GO:0090049	regulation of cell migration involved in...	0.01823
Dog Aggression	GO:0060412	ventricular septum morphogenesis	0.02115
Dog Aggression	GO:0030433	ubiquitin-dependent ERAD pathway	0.02193
Dog Aggression	GO:0030004	cellular monovalent inorganic cation hom...	0.02474
Dog Aggression	GO:0008038	neuron recognition	0.03117
Dog Aggression	GO:2001259	positive regulation of cation channel ac...	0.03135
Dog Aggression	GO:0071824	protein-DNA complex subunit organization	0.03153
Dog Aggression	GO:0043039	tRNA aminoacylation	0.03155
Dog Aggression	GO:0032731	positive regulation of interleukin-1 bet...	0.03173
Dog Aggression	GO:0019083	viral transcription	0.03176
Dog Aggression	GO:0008652	cellular amino acid biosynthetic process	0.03181
Dog Aggression	GO:0046530	photoreceptor cell differentiation	0.03182
Dog Aggression	GO:0002263	cell activation involved in immune respo...	0.03209
Dog Aggression	GO:1902117	positive regulation of organelle assembl...	0.03434
Dog Aggression	GO:0051642	centrosome localization	0.03523
Dog Aggression	GO:0001946	lymphangiogenesis	0.03833
Dog Aggression	GO:0006684	sphingomyelin metabolic process	0.03833
Dog Aggression	GO:0006901	vesicle coating	0.03833
Dog Aggression	GO:0045662	negative regulation of myoblast differen...	0.03833
Dog Aggression	GO:0046596	regulation of viral entry into host cell	0.03833
Dog Aggression	GO:0051383	kinetochore organization	0.03833
Dog Aggression	GO:0070207	protein homotrimerization	0.03833
Dog Aggression	GO:0072378	blood coagulation, fibrin clot formation	0.03833
Dog Aggression	GO:0098719	sodium ion import across plasma membrane	0.03833
Dog Aggression	GO:1900151	regulation of nuclear-transcribed mRNA c...	0.03833
Dog Aggression	GO:2000209	regulation of anoikis	0.03833
Dog Aggression	GO:0043406	positive regulation of MAP kinase activi...	0.03924
Dog Aggression	GO:0022602	ovulation cycle process	0.03934
Dog Aggression	GO:0007009	plasma membrane organization	0.04326
Dog Aggression	GO:0120162	positive regulation of cold-induced ther...	0.04353
Dog Aggression	GO:2000242	negative regulation of reproductive proc...	0.04369
Dog Aggression	GO:0001649	osteoblast differentiation	0.044
Dog Aggression	GO:0045661	regulation of myoblast differentiation	0.04535
Dog Aggression	GO:0003179	heart valve morphogenesis	0.04566
Dog Aggression	GO:0007585	respiratory gaseous exchange	0.0457
Dog Aggression	GO:0002053	positive regulation of mesenchymal cell ...	0.04588
Dog Aggression	GO:0006450	regulation of translational fidelity	0.04588
Dog Aggression	GO:0032469	endoplasmic reticulum calcium ion homeos...	0.04588
Dog Aggression	GO:0048710	regulation of astrocyte differentiation	0.04588
Dog Aggression	GO:0090110	cargo loading into COPII-coated vesicle	0.04588
Dog Aggression	GO:0060560	developmental growth involved in morphog...	0.04599
Dog Aggression	GO:0042981	regulation of apoptotic process	0.04668
Dog Aggression	GO:0070301	cellular response to hydrogen peroxide	0.04826
Dog Fear	GO:0045022	early endosome to late endosome transpor...	0.0021
Dog Fear	GO:0099518	vesicle cytoskeletal trafficking	0.0033
Dog Fear	GO:0033059	cellular pigmentation	0.004
Dog Fear	GO:0050775	positive regulation of dendrite morphoge...	0.0051
Dog Fear	GO:0010324	membrane invagination	0.0065
Dog Fear	GO:0035556	intracellular signal transduction	0.0074
Dog Fear	GO:0051897	positive regulation of protein kinase B ...	0.0075
Dog Fear	GO:0030073	insulin secretion	0.0101
Dog Fear	GO:0006636	unsaturated fatty acid biosynthetic proc...	0.0104
Dog Fear	GO:0014855	striated muscle cell proliferation	0.0105
Dog Fear	GO:0034333	adherens junction assembly	0.0105
Dog Fear	GO:0007411	axon guidance	0.012
Dog Fear	GO:0032008	positive regulation of TOR signaling	0.0152
Dog Fear	GO:2000352	negative regulation of endothelial cell ...	0.0152
Dog Fear	GO:0006352	DNA-templated transcription, initiation	0.0154
Dog Fear	GO:0050953	sensory perception of light stimulus	0.0156
Dog Fear	GO:0007399	nervous system development	0.0171
Dog Fear	GO:0016358	dendrite development	0.0172
Dog Fear	GO:0071168	protein localization to chromatin	0.0181
Dog Fear	GO:0021766	hippocampus development	0.0193
Dog Fear	GO:0050772	positive regulation of axonogenesis	0.0211
Dog Fear	GO:0050918	positive chemotaxis	0.0211
Dog Fear	GO:0030199	collagen fibril organization	0.0215
Dog Fear	GO:0001843	neural tube closure	0.0237
Dog Fear	GO:0031398	positive regulation of protein ubiquitin...	0.0237
Dog Fear	GO:0045785	positive regulation of cell adhesion	0.0241
Dog Fear	GO:0014032	neural crest cell development	0.0273
Dog Fear	GO:0048588	developmental cell growth	0.0273
Dog Fear	GO:0046834	lipid phosphorylation	0.0274
Dog Fear	GO:0030517	negative regulation of axon extension	0.0275
Dog Fear	GO:0030850	prostate gland development	0.0275
Dog Fear	GO:0042531	positive regulation of tyrosine phosphor...	0.0281
Dog Fear	GO:0019722	calcium-mediated signaling	0.0316
Dog Fear	GO:0009056	catabolic process	0.0327
Dog Fear	GO:0042330	taxis	0.0329
Dog Fear	GO:0003309	type B pancreatic cell differentiation	0.0336
Dog Fear	GO:0034204	lipid translocation	0.0336
Dog Fear	GO:1902100	negative regulation of metaphase/anaphas...	0.0336
Dog Fear	GO:1905207	regulation of cardiocyte differentiation	0.0336
Dog Fear	GO:1905819	negative regulation of chromosome separa...	0.0336
Dog Fear	GO:0009145	purine nucleoside triphosphate biosynthe...	0.0337
Dog Fear	GO:0015749	monosaccharide transmembrane transport	0.0337
Dog Fear	GO:1902850	microtubule cytoskeleton organization in...	0.0337
Dog Fear	GO:0035265	organ growth	0.0344
Dog Fear	GO:0030155	regulation of cell adhesion	0.0349
Dog Fear	GO:2001259	positive regulation of cation channel ac...	0.0362
Dog Fear	GO:0016197	endosomal transport	0.0404
Dog Fear	GO:0032436	positive regulation of proteasomal ubiqu...	0.041
Dog Fear	GO:0002719	negative regulation of cytokine producti...	0.0425
Dog Fear	GO:0006684	sphingomyelin metabolic process	0.0425
Dog Fear	GO:0051968	positive regulation of synaptic transmis...	0.0425
Dog Fear	GO:0060749	mammary gland alveolus development	0.0425
Dog Fear	GO:0070633	transepithelial transport	0.0425
Dog Fear	GO:0071498	cellular response to fluid shear stress	0.0425
Dog Fear	GO:0014068	positive regulation of phosphatidylinosi...	0.0444
Dog Fear	GO:0035914	skeletal muscle cell differentiation	0.0453
Dog Fear	GO:0060711	labyrinthine layer development	0.0453
Dog Fear	GO:0006470	protein dephosphorylation	0.0475
Dog Rivalry	GO:0048477	oogenesis	0.00056
Dog Rivalry	GO:0032092	positive regulation of protein binding	0.00193
Dog Rivalry	GO:0051293	establishment of spindle localization	0.00416
Dog Rivalry	GO:0003333	amino acid transmembrane transport	0.0084
Dog Rivalry	GO:0008593	regulation of Notch signaling pathway	0.00995
Dog Rivalry	GO:0022900	electron transport chain	0.01177
Dog Rivalry	GO:0006984	ER-nucleus signaling pathway	0.01179
Dog Rivalry	GO:0007214	gamma-aminobutyric acid signaling pathwa...	0.01372
Dog Rivalry	GO:1903169	regulation of calcium ion transmembrane ...	0.01389
Dog Rivalry	GO:1901575	organic substance catabolic process	0.0178
Dog Rivalry	GO:0031297	replication fork processing	0.01811
Dog Rivalry	GO:0007275	multicellular organism development	0.0186
Dog Rivalry	GO:0060173	limb development	0.02281
Dog Rivalry	GO:0060393	regulation of pathway-restricted SMAD pr...	0.02285
Dog Rivalry	GO:0051651	maintenance of location in cell	0.02292
Dog Rivalry	GO:0051932	synaptic transmission, GABAergic	0.023
Dog Rivalry	GO:0042100	B cell proliferation	0.02308
Dog Rivalry	GO:0015807	L-amino acid transport	0.02309
Dog Rivalry	GO:0007131	reciprocal meiotic recombination	0.02318
Dog Rivalry	GO:0044260	cellular macromolecule metabolic process	0.0251
Dog Rivalry	GO:0044248	cellular catabolic process	0.02555
Dog Rivalry	GO:0001541	ovarian follicle development	0.02597
Dog Rivalry	GO:0015804	neutral amino acid transport	0.02597
Dog Rivalry	GO:0031345	negative regulation of cell projection o...	0.02681
Dog Rivalry	GO:0048332	mesoderm morphogenesis	0.02689
Dog Rivalry	GO:1902850	microtubule cytoskeleton organization in...	0.027
Dog Rivalry	GO:0000578	embryonic axis specification	0.02839
Dog Rivalry	GO:0021756	striatum development	0.02839
Dog Rivalry	GO:0051016	barbed-end actin filament capping	0.02839
Dog Rivalry	GO:2000242	negative regulation of reproductive proc...	0.02894
Dog Rivalry	GO:0043123	positive regulation of I-kappaB kinase/N...	0.03073
Dog Rivalry	GO:0002312	B cell activation involved in immune res...	0.03399
Dog Rivalry	GO:0006027	glycosaminoglycan catabolic process	0.03409
Dog Rivalry	GO:0032469	endoplasmic reticulum calcium ion homeos...	0.03409
Dog Rivalry	GO:0060628	regulation of ER to Golgi vesicle-mediat...	0.03409
Dog Rivalry	GO:0090110	cargo loading into COPII-coated vesicle	0.03409
Dog Rivalry	GO:0030512	negative regulation of transforming grow...	0.03887
Dog Rivalry	GO:0031146	SCF-dependent proteasomal ubiquitin-depe...	0.03887
Dog Rivalry	GO:0007140	male meiotic nuclear division	0.03995
Dog Rivalry	GO:0051303	establishment of chromosome localization	0.0401
Dog Rivalry	GO:0072384	organelle transport along microtubule	0.0401
Dog Rivalry	GO:0050855	regulation of B cell receptor signaling ...	0.04019
Dog Rivalry	GO:0060039	pericardium development	0.04019
Dog Rivalry	GO:0060669	embryonic placenta morphogenesis	0.04019
Dog Rivalry	GO:0070979	protein K11-linked ubiquitination	0.04019
Dog Rivalry	GO:0044782	cilium organization	0.0408
Dog Rivalry	GO:0007031	peroxisome organization	0.04667
Dog Rivalry	GO:0009948	anterior/posterior axis specification	0.04667
Dog Rivalry	GO:0010922	positive regulation of phosphatase activ...	0.04667
Dog Rivalry	GO:0018200	peptidyl-glutamic acid modification	0.04667
Dog Rivalry	GO:0043046	DNA methylation involved in gamete gener...	0.04667
Dog Rivalry	GO:0060074	synapse maturation	0.04667
Dog Rivalry	GO:0071542	dopaminergic neuron differentiation	0.04667
Dog Rivalry	GO:0045580	regulation of T cell differentiation	0.0468
Dog Rivalry	GO:0006914	autophagy	0.04681
Dog Rivalry	GO:0006793	phosphorus metabolic process	0.04915
Energy	GO:0001764	neuron migration	0.00067
Energy	GO:0007099	centriole replication	0.00278
Energy	GO:1905515	non-motile cilium assembly	0.00487
Energy	GO:0006890	retrograde vesicle-mediated transport, G...	0.00545
Energy	GO:2000114	regulation of establishment of cell pola...	0.00784
Energy	GO:0048193	Golgi vesicle transport	0.00928
Energy	GO:0090102	cochlea development	0.00958
Energy	GO:0007411	axon guidance	0.01113
Energy	GO:0031023	microtubule organizing center organizati...	0.01213
Energy	GO:1905475	regulation of protein localization to me...	0.01264
Energy	GO:0021987	cerebral cortex development	0.01347
Energy	GO:0060444	branching involved in mammary gland duct...	0.0137
Energy	GO:0032941	secretion by tissue	0.01607
Energy	GO:0035116	embryonic hindlimb morphogenesis	0.01607
Energy	GO:0021532	neural tube patterning	0.01722
Energy	GO:0021549	cerebellum development	0.02244
Energy	GO:0006366	transcription by RNA polymerase II	0.02283
Energy	GO:0060122	inner ear receptor cell stereocilium org...	0.02451
Energy	GO:0051640	organelle localization	0.02755
Energy	GO:0065009	regulation of molecular function	0.02989
Energy	GO:0060512	prostate gland morphogenesis	0.03014
Energy	GO:0048017	inositol lipid-mediated signaling	0.03052
Energy	GO:0007030	Golgi organization	0.03416
Energy	GO:0042981	regulation of apoptotic process	0.0343
Energy	GO:0000187	activation of MAPK activity	0.03464
Energy	GO:0006904	vesicle docking involved in exocytosis	0.03491
Energy	GO:1901998	toxin transport	0.03491
Energy	GO:0046849	bone remodeling	0.03513
Energy	GO:0006622	protein targeting to lysosome	0.03514
Energy	GO:0008334	histone mRNA metabolic process	0.03514
Energy	GO:0022038	corpus callosum development	0.03514
Energy	GO:0048172	regulation of short-term neuronal synapt...	0.03514
Energy	GO:0060749	mammary gland alveolus development	0.03514
Energy	GO:2000209	regulation of anoikis	0.03514
Energy	GO:0060070	canonical Wnt signaling pathway	0.03752
Energy	GO:0036342	post-anal tail morphogenesis	0.04211
Energy	GO:0048710	regulation of astrocyte differentiation	0.04211
Energy	GO:0048791	calcium ion-regulated exocytosis of neur...	0.04211
Energy	GO:2000251	positive regulation of actin cytoskeleto...	0.04211
Energy	GO:0007528	neuromuscular junction development	0.04723
Energy	GO:0071260	cellular response to mechanical stimulus	0.04723
Energy	GO:0002052	positive regulation of neuroblast prolif...	0.04954
Energy	GO:0032012	regulation of ARF protein signal transdu...	0.04954
Energy	GO:0044058	regulation of digestive system process	0.04954
Energy	GO:0060039	pericardium development	0.04954
Energy	GO:0060740	prostate gland epithelium morphogenesis	0.04954
Energy	GO:0070593	dendrite self-avoidance	0.04954
Energy	GO:0070861	regulation of protein exit from endoplas...	0.04954
Energy	GO:0090023	positive regulation of neutrophil chemot...	0.04954
Energy	GO:1903861	positive regulation of dendrite extensio...	0.04954
Excitability	GO:0071417	cellular response to organonitrogen comp...	0.0016
Excitability	GO:0006336	DNA replication-independent nucleosome a...	0.0037
Excitability	GO:0072425	signal transduction involved in G2 DNA d...	0.0037
Excitability	GO:2000209	regulation of anoikis	0.0037
Excitability	GO:0002053	positive regulation of mesenchymal cell ...	0.0049
Excitability	GO:1990869	cellular response to chemokine	0.0063
Excitability	GO:0051570	regulation of histone H3-K9 methylation	0.0081
Excitability	GO:0014706	striated muscle tissue development	0.0105
Excitability	GO:0009605	response to external stimulus	0.015
Excitability	GO:0006767	water-soluble vitamin metabolic process	0.0175
Excitability	GO:0050770	regulation of axonogenesis	0.0175
Excitability	GO:0014065	phosphatidylinositol 3-kinase signaling	0.0207
Excitability	GO:0042149	cellular response to glucose starvation	0.0238
Excitability	GO:0046326	positive regulation of glucose import	0.0238
Excitability	GO:2000060	positive regulation of ubiquitin-depende...	0.0271
Excitability	GO:0006892	post-Golgi vesicle-mediated transport	0.0273
Excitability	GO:0030890	positive regulation of B cell proliferat...	0.0273
Excitability	GO:0048873	homeostasis of number of cells within a ...	0.0311
Excitability	GO:0008104	protein localization	0.0322
Excitability	GO:0071407	cellular response to organic cyclic comp...	0.0332
Excitability	GO:0045321	leukocyte activation	0.0336
Excitability	GO:0099536	synaptic signaling	0.0338
Excitability	GO:0051453	regulation of intracellular pH	0.0393
Excitability	GO:0045332	phospholipid translocation	0.0395
Excitability	GO:0021517	ventral spinal cord development	0.0415
Excitability	GO:0019430	removal of superoxide radicals	0.0416
Excitability	GO:0019731	antibacterial humoral response	0.0416
Excitability	GO:0021756	striatum development	0.0416
Excitability	GO:0043951	negative regulation of cAMP-mediated sig...	0.0416
Excitability	GO:0046112	nucleobase biosynthetic process	0.0416
Excitability	GO:0071498	cellular response to fluid shear stress	0.0416
Excitability	GO:0098719	sodium ion import across plasma membrane	0.0416
Excitability	GO:0001764	neuron migration	0.0456
Excitability	GO:0006470	protein dephosphorylation	0.0475
Excitability	GO:0030593	neutrophil chemotaxis	0.0487
Excitability	GO:0043124	negative regulation of I-kappaB kinase/N...	0.0489
Excitability	GO:0051568	histone H3-K4 methylation	0.0497
Excitability	GO:0002360	T cell lineage commitment	0.0498
Excitability	GO:0010613	positive regulation of cardiac muscle hy...	0.0498
Excitability	GO:0016486	peptide hormone processing	0.0498
Excitability	GO:0031061	negative regulation of histone methylati...	0.0498
Excitability	GO:0032369	negative regulation of lipid transport	0.0498
Excitability	GO:0048745	smooth muscle tissue development	0.0498
Excitability	GO:0050996	positive regulation of lipid catabolic p...	0.0498
Excitability	GO:0060218	hematopoietic stem cell differentiation	0.0498
Excitability	GO:0070076	histone lysine demethylation	0.0498
Excitability	GO:0071467	cellular response to pH	0.0498
Excitability	GO:1901532	regulation of hematopoietic progenitor c...	0.0498
Excitability	GO:2000765	regulation of cytoplasmic translation	0.0498
Nonsocial Fear	GO:0071453	cellular response to oxygen levels	0.0023
Nonsocial Fear	GO:0060047	heart contraction	0.0103
Nonsocial Fear	GO:0032446	protein modification by small protein co...	0.0124
Nonsocial Fear	GO:0043087	regulation of GTPase activity	0.0126
Nonsocial Fear	GO:0051603	proteolysis involved in cellular protein...	0.0138
Nonsocial Fear	GO:0044260	cellular macromolecule metabolic process	0.0161
Nonsocial Fear	GO:0070207	protein homotrimerization	0.0162
Nonsocial Fear	GO:0006027	glycosaminoglycan catabolic process	0.0195
Nonsocial Fear	GO:0006450	regulation of translational fidelity	0.0195
Nonsocial Fear	GO:0061037	negative regulation of cartilage develop...	0.0195
Nonsocial Fear	GO:0042330	taxis	0.0198
Nonsocial Fear	GO:0010657	muscle cell apoptotic process	0.02
Nonsocial Fear	GO:0015749	monosaccharide transmembrane transport	0.0201
Nonsocial Fear	GO:0044419	interspecies interaction between organis...	0.0202
Nonsocial Fear	GO:0016567	protein ubiquitination	0.0209
Nonsocial Fear	GO:0046854	phosphatidylinositol phosphorylation	0.0217
Nonsocial Fear	GO:0032728	positive regulation of interferon-beta p...	0.0231
Nonsocial Fear	GO:0008045	motor neuron axon guidance	0.027
Nonsocial Fear	GO:0048011	neurotrophin TRK receptor signaling path...	0.027
Nonsocial Fear	GO:0051570	regulation of histone H3-K9 methylation	0.027
Nonsocial Fear	GO:0034142	toll-like receptor 4 signaling pathway	0.0311
Nonsocial Fear	GO:0010575	positive regulation of vascular endothel...	0.0354
Nonsocial Fear	GO:0015012	heparan sulfate proteoglycan biosyntheti...	0.0354
Nonsocial Fear	GO:0035235	ionotropic glutamate receptor signaling ...	0.0354
Nonsocial Fear	GO:0030178	negative regulation of Wnt signaling pat...	0.0355
Nonsocial Fear	GO:0090316	positive regulation of intracellular pro...	0.0366
Nonsocial Fear	GO:0006511	ubiquitin-dependent protein catabolic pr...	0.0394
Nonsocial Fear	GO:0046633	alpha-beta T cell proliferation	0.0396
Nonsocial Fear	GO:0006898	receptor-mediated endocytosis	0.0434
Nonsocial Fear	GO:0006383	transcription by RNA polymerase III	0.0447
Nonsocial Fear	GO:0006767	water-soluble vitamin metabolic process	0.0447
Nonsocial Fear	GO:0033522	histone H2A ubiquitination	0.0447
Nonsocial Fear	GO:0035307	positive regulation of protein dephospho...	0.0447
Nonsocial Fear	GO:0070198	protein localization to chromosome, telo...	0.0447
Nonsocial Fear	GO:0086019	cell-cell signaling involved in cardiac ...	0.0447
Owner Aggression	GO:0031579	membrane raft organization	0.0031
Owner Aggression	GO:0051293	establishment of spindle localization	0.0038
Owner Aggression	GO:2000649	regulation of sodium ion transmembrane t...	0.0046
Owner Aggression	GO:2000781	positive regulation of double-strand bre...	0.0072
Owner Aggression	GO:0032309	icosanoid secretion	0.009
Owner Aggression	GO:0000165	MAPK cascade	0.0105
Owner Aggression	GO:0042398	cellular modified amino acid biosyntheti...	0.0118
Owner Aggression	GO:0050821	protein stabilization	0.0121
Owner Aggression	GO:0015833	peptide transport	0.0125
Owner Aggression	GO:0034341	response to interferon-gamma	0.0126
Owner Aggression	GO:0007044	cell-substrate junction assembly	0.0162
Owner Aggression	GO:0032147	activation of protein kinase activity	0.0165
Owner Aggression	GO:0060047	heart contraction	0.0165
Owner Aggression	GO:0048286	lung alveolus development	0.0177
Owner Aggression	GO:0015918	sterol transport	0.0208
Owner Aggression	GO:0045070	positive regulation of viral genome repl...	0.0225
Owner Aggression	GO:0043124	negative regulation of I-kappaB kinase/N...	0.0251
Owner Aggression	GO:0010043	response to zinc ion	0.0256
Owner Aggression	GO:0021756	striatum development	0.0256
Owner Aggression	GO:2001032	regulation of double-strand break repair...	0.0256
Owner Aggression	GO:0007098	centrosome cycle	0.0279
Owner Aggression	GO:0031098	stress-activated protein kinase signalin...	0.0282
Owner Aggression	GO:0010975	regulation of neuron projection developm...	0.0298
Owner Aggression	GO:0045859	regulation of protein kinase activity	0.0298
Owner Aggression	GO:0045672	positive regulation of osteoclast differ...	0.0307
Owner Aggression	GO:0046395	carboxylic acid catabolic process	0.0307
Owner Aggression	GO:0048791	calcium ion-regulated exocytosis of neur...	0.0307
Owner Aggression	GO:1904031	positive regulation of cyclin-dependent ...	0.0307
Owner Aggression	GO:0031146	SCF-dependent proteasomal ubiquitin-depe...	0.0338
Owner Aggression	GO:0051668	localization within membrane	0.0355
Owner Aggression	GO:0031326	regulation of cellular biosynthetic proc...	0.0357
Owner Aggression	GO:0001843	neural tube closure	0.036
Owner Aggression	GO:0036035	osteoclast development	0.0363
Owner Aggression	GO:1903010	regulation of bone development	0.0363
Owner Aggression	GO:1903861	positive regulation of dendrite extensio...	0.0363
Owner Aggression	GO:0016042	lipid catabolic process	0.0412
Owner Aggression	GO:0060541	respiratory system development	0.0412
Owner Aggression	GO:0007020	microtubule nucleation	0.0422
Owner Aggression	GO:0008631	intrinsic apoptotic signaling pathway in...	0.0422
Owner Aggression	GO:0009435	NAD biosynthetic process	0.0422
Owner Aggression	GO:1900027	regulation of ruffle assembly	0.0422
Owner Aggression	GO:0007264	small GTPase mediated signal transductio...	0.0441
Owner Aggression	GO:1901361	organic cyclic compound catabolic proces...	0.0442
Owner Aggression	GO:0032620	interleukin-17 production	0.0484
Owner Aggression	GO:0034142	toll-like receptor 4 signaling pathway	0.0484
Owner Aggression	GO:0051452	intracellular pH reduction	0.0484
Owner Aggression	GO:0060292	long-term synaptic depression	0.0484
Owner Aggression	GO:0120036	plasma membrane bounded cell projection ...	0.0489
Owner Aggression	GO:0030323	respiratory tube development	0.0498
Separation Problems	GO:0032288	myelin assembly	0.002
Separation Problems	GO:0030866	cortical actin cytoskeleton organization	0.0041
Separation Problems	GO:0035561	regulation of chromatin binding	0.0045
Separation Problems	GO:0043537	negative regulation of blood vessel endo...	0.0099
Separation Problems	GO:0043547	positive regulation of GTPase activity	0.01
Separation Problems	GO:0031032	actomyosin structure organization	0.0114
Separation Problems	GO:0006892	post-Golgi vesicle-mediated transport	0.0156
Separation Problems	GO:0046834	lipid phosphorylation	0.018
Separation Problems	GO:0006733	oxidoreduction coenzyme metabolic proces...	0.0181
Separation Problems	GO:0060255	regulation of macromolecule metabolic pr...	0.0195
Separation Problems	GO:0034612	response to tumor necrosis factor	0.0229
Separation Problems	GO:0001541	ovarian follicle development	0.0257
Separation Problems	GO:0015749	monosaccharide transmembrane transport	0.0268
Separation Problems	GO:0048017	inositol lipid-mediated signaling	0.0268
Separation Problems	GO:0070102	interleukin-6-mediated signaling pathway	0.0282
Separation Problems	GO:1901661	quinone metabolic process	0.0282
Separation Problems	GO:0010812	negative regulation of cell-substrate ad...	0.0337
Separation Problems	GO:0002360	T cell lineage commitment	0.0338
Separation Problems	GO:0006450	regulation of translational fidelity	0.0338
Separation Problems	GO:0008299	isoprenoid biosynthetic process	0.0338
Separation Problems	GO:0015868	purine ribonucleotide transport	0.0338
Separation Problems	GO:0031641	regulation of myelination	0.0338
Separation Problems	GO:0051503	adenine nucleotide transport	0.0338
Separation Problems	GO:0032526	response to retinoic acid	0.0397
Separation Problems	GO:0001702	gastrulation with mouth forming second	0.0399
Separation Problems	GO:0006672	ceramide metabolic process	0.0462
Separation Problems	GO:0007031	peroxisome organization	0.0463
Separation Problems	GO:0051984	positive regulation of chromosome segreg...	0.0463
Separation Problems	GO:0060390	regulation of SMAD protein signal transd...	0.0463
Separation Problems	GO:0070498	interleukin-1-mediated signaling pathway	0.0463
Separation Problems	GO:0010507	negative regulation of autophagy	0.0497
Stranger Aggression	GO:0070296	sarcoplasmic reticulum calcium ion trans...	0.0027
Stranger Aggression	GO:1903432	regulation of TORC1 signaling	0.0034
Stranger Aggression	GO:0007041	lysosomal transport	0.0041
Stranger Aggression	GO:0032008	positive regulation of TOR signaling	0.0064
Stranger Aggression	GO:0032413	negative regulation of ion transmembrane...	0.009
Stranger Aggression	GO:1904063	negative regulation of cation transmembr...	0.0105
Stranger Aggression	GO:0006024	glycosaminoglycan biosynthetic process	0.0121
Stranger Aggression	GO:0071230	cellular response to amino acid stimulus	0.0134
Stranger Aggression	GO:0060047	heart contraction	0.015
Stranger Aggression	GO:2001259	positive regulation of cation channel ac...	0.0158
Stranger Aggression	GO:0045840	positive regulation of mitotic nuclear d...	0.0223
Stranger Aggression	GO:2000242	negative regulation of reproductive proc...	0.0223
Stranger Aggression	GO:0006914	autophagy	0.0231
Stranger Aggression	GO:0006534	cysteine metabolic process	0.0236
Stranger Aggression	GO:0006622	protein targeting to lysosome	0.0236
Stranger Aggression	GO:0008272	sulfate transport	0.0236
Stranger Aggression	GO:0046112	nucleobase biosynthetic process	0.0236
Stranger Aggression	GO:0070633	transepithelial transport	0.0236
Stranger Aggression	GO:0072012	glomerulus vasculature development	0.0236
Stranger Aggression	GO:2000095	regulation of Wnt signaling pathway, pla...	0.0236
Stranger Aggression	GO:2001057	reactive nitrogen species metabolic proc...	0.0244
Stranger Aggression	GO:0051174	regulation of phosphorus metabolic proce...	0.0253
Stranger Aggression	GO:0055081	anion homeostasis	0.0282
Stranger Aggression	GO:0002089	lens morphogenesis in camera-type eye	0.0283
Stranger Aggression	GO:0006450	regulation of translational fidelity	0.0283
Stranger Aggression	GO:0015740	C4-dicarboxylate transport	0.0283
Stranger Aggression	GO:0031116	positive regulation of microtubule polym...	0.0283
Stranger Aggression	GO:0072176	nephric duct development	0.0283
Stranger Aggression	GO:0072337	modified amino acid transport	0.0283
Stranger Aggression	GO:0072529	pyrimidine-containing compound catabolic...	0.0283
Stranger Aggression	GO:1904031	positive regulation of cyclin-dependent ...	0.0283
Stranger Aggression	GO:0050807	regulation of synapse organization	0.0333
Stranger Aggression	GO:0001780	neutrophil homeostasis	0.0335
Stranger Aggression	GO:0007064	mitotic sister chromatid cohesion	0.0335
Stranger Aggression	GO:0019068	virion assembly	0.0335
Stranger Aggression	GO:0070528	protein kinase C signaling	0.0335
Stranger Aggression	GO:2000042	negative regulation of double-strand bre...	0.0335
Stranger Aggression	GO:0048666	neuron development	0.0354
Stranger Aggression	GO:0006892	post-Golgi vesicle-mediated transport	0.0356
Stranger Aggression	GO:0006906	vesicle fusion	0.0358
Stranger Aggression	GO:0032543	mitochondrial translation	0.0361
Stranger Aggression	GO:0007249	I-kappaB kinase/NF-kappaB signaling	0.0386
Stranger Aggression	GO:0006814	sodium ion transport	0.0387
Stranger Aggression	GO:0007063	regulation of sister chromatid cohesion	0.0389
Stranger Aggression	GO:0015813	L-glutamate transmembrane transport	0.0389
Stranger Aggression	GO:0030212	hyaluronan metabolic process	0.0389
Stranger Aggression	GO:0051984	positive regulation of chromosome segreg...	0.0389
Stranger Aggression	GO:0071218	cellular response to misfolded protein	0.0389
Stranger Aggression	GO:0120035	regulation of plasma membrane bounded ce...	0.04
Stranger Aggression	GO:0086004	regulation of cardiac muscle cell contra...	0.0447
Stranger Aggression	GO:0009112	nucleobase metabolic process	0.048
Stranger Aggression	GO:0043242	negative regulation of protein complex d...	0.0483
Stranger Aggression	GO:0043550	regulation of lipid kinase activity	0.0483
Stranger Fear	GO:0001780	neutrophil homeostasis	0.0014
Stranger Fear	GO:0050804	modulation of chemical synaptic transmis...	0.0017
Stranger Fear	GO:0046039	GTP metabolic process	0.0018
Stranger Fear	GO:0035335	peptidyl-tyrosine dephosphorylation	0.0023
Stranger Fear	GO:0035116	embryonic hindlimb morphogenesis	0.0048
Stranger Fear	GO:0099175	regulation of postsynapse organization	0.0048
Stranger Fear	GO:0008015	blood circulation	0.0052
Stranger Fear	GO:0003015	heart process	0.0053
Stranger Fear	GO:0030520	intracellular estrogen receptor signalin...	0.0053
Stranger Fear	GO:0040012	regulation of locomotion	0.0054
Stranger Fear	GO:0051897	positive regulation of protein kinase B ...	0.0055
Stranger Fear	GO:0032467	positive regulation of cytokinesis	0.0056
Stranger Fear	GO:0044818	mitotic G2/M transition checkpoint	0.0073
Stranger Fear	GO:1901990	regulation of mitotic cell cycle phase t...	0.0094
Stranger Fear	GO:0044774	mitotic DNA integrity checkpoint	0.0096
Stranger Fear	GO:0035556	intracellular signal transduction	0.0101
Stranger Fear	GO:0042147	retrograde transport, endosome to Golgi	0.0102
Stranger Fear	GO:0046148	pigment biosynthetic process	0.0108
Stranger Fear	GO:0048813	dendrite morphogenesis	0.0119
Stranger Fear	GO:0060173	limb development	0.0122
Stranger Fear	GO:0048146	positive regulation of fibroblast prolif...	0.0135
Stranger Fear	GO:0031398	positive regulation of protein ubiquitin...	0.0148
Stranger Fear	GO:0000578	embryonic axis specification	0.0153
Stranger Fear	GO:0006534	cysteine metabolic process	0.0153
Stranger Fear	GO:0008272	sulfate transport	0.0153
Stranger Fear	GO:0010888	negative regulation of lipid storage	0.0153
Stranger Fear	GO:0046112	nucleobase biosynthetic process	0.0153
Stranger Fear	GO:0072012	glomerulus vasculature development	0.0153
Stranger Fear	GO:1903204	negative regulation of oxidative stress-...	0.0153
Stranger Fear	GO:0000186	activation of MAPKK activity	0.0166
Stranger Fear	GO:0008344	adult locomotory behavior	0.0181
Stranger Fear	GO:0071901	negative regulation of protein serine/th...	0.0181
Stranger Fear	GO:0006450	regulation of translational fidelity	0.0184
Stranger Fear	GO:0042330	taxis	0.0196
Stranger Fear	GO:0006793	phosphorus metabolic process	0.0211
Stranger Fear	GO:0016331	morphogenesis of embryonic epithelium	0.0217
Stranger Fear	GO:0030540	female genitalia development	0.0218
Stranger Fear	GO:0043114	regulation of vascular permeability	0.0218
Stranger Fear	GO:0046653	tetrahydrofolate metabolic process	0.0218
Stranger Fear	GO:0060740	prostate gland epithelium morphogenesis	0.0218
Stranger Fear	GO:0044272	sulfur compound biosynthetic process	0.0234
Stranger Fear	GO:0007026	negative regulation of microtubule depol...	0.0255
Stranger Fear	GO:0033032	regulation of myeloid cell apoptotic pro...	0.0255
Stranger Fear	GO:0071218	cellular response to misfolded protein	0.0255
Stranger Fear	GO:1900182	positive regulation of protein localizat...	0.0292
Stranger Fear	GO:0006144	purine nucleobase metabolic process	0.0294
Stranger Fear	GO:0007616	long-term memory	0.0294
Stranger Fear	GO:0035115	embryonic forelimb morphogenesis	0.0294
Stranger Fear	GO:0086004	regulation of cardiac muscle cell contra...	0.0294
Stranger Fear	GO:0098901	regulation of cardiac muscle cell action...	0.0294
Stranger Fear	GO:0006515	protein quality control for misfolded or...	0.0335
Stranger Fear	GO:0006730	one-carbon metabolic process	0.0335
Stranger Fear	GO:0051894	positive regulation of focal adhesion as...	0.0335
Stranger Fear	GO:0071242	cellular response to ammonium ion	0.0335
Stranger Fear	GO:1900087	positive regulation of G1/S transition o...	0.0335
Stranger Fear	GO:2000036	regulation of stem cell population maint...	0.0335
Stranger Fear	GO:0043524	negative regulation of neuron apoptotic ...	0.0356
Stranger Fear	GO:0007212	dopamine receptor signaling pathway	0.0378
Stranger Fear	GO:0032008	positive regulation of TOR signaling	0.0378
Stranger Fear	GO:0033363	secretory granule organization	0.0378
Stranger Fear	GO:0045616	regulation of keratinocyte differentiati...	0.0378
Stranger Fear	GO:0009894	regulation of catabolic process	0.0381
Stranger Fear	GO:0043068	positive regulation of programmed cell d...	0.0381
Stranger Fear	GO:0071417	cellular response to organonitrogen comp...	0.0381
Stranger Fear	GO:1990748	cellular detoxification	0.0385
Stranger Fear	GO:0016049	cell growth	0.0389
Stranger Fear	GO:0007569	cell aging	0.0421
Stranger Fear	GO:0006767	water-soluble vitamin metabolic process	0.0422
Stranger Fear	GO:0009225	nucleotide-sugar metabolic process	0.0422
Stranger Fear	GO:0060986	endocrine hormone secretion	0.0422
Stranger Fear	GO:0071168	protein localization to chromatin	0.0422
Stranger Fear	GO:0030036	actin cytoskeleton organization	0.0464
Stranger Fear	GO:0019934	cGMP-mediated signaling	0.0469
Stranger Fear	GO:0050918	positive chemotaxis	0.0469
Stranger Fear	GO:0052652	cyclic purine nucleotide metabolic proce...	0.0469
Touch Sensitivity	GO:2001224	positive regulation of neuron migration	0.00017
Touch Sensitivity	GO:0007264	small GTPase mediated signal transductio...	0.00137
Touch Sensitivity	GO:1903861	positive regulation of dendrite extensio...	0.00401
Touch Sensitivity	GO:0030947	regulation of vascular endothelial growt...	0.0051
Touch Sensitivity	GO:0016242	negative regulation of macroautophagy	0.00636
Touch Sensitivity	GO:0035115	embryonic forelimb morphogenesis	0.00636
Touch Sensitivity	GO:0070201	regulation of establishment of protein l...	0.00771
Touch Sensitivity	GO:0021801	cerebral cortex radial glia guided migra...	0.00779
Touch Sensitivity	GO:0090090	negative regulation of canonical Wnt sig...	0.01035
Touch Sensitivity	GO:0042176	regulation of protein catabolic process	0.01087
Touch Sensitivity	GO:0006383	transcription by RNA polymerase III	0.01117
Touch Sensitivity	GO:0035116	embryonic hindlimb morphogenesis	0.01313
Touch Sensitivity	GO:0099175	regulation of postsynapse organization	0.01313
Touch Sensitivity	GO:1901343	negative regulation of vasculature devel...	0.01503
Touch Sensitivity	GO:0097352	autophagosome maturation	0.01528
Touch Sensitivity	GO:0042733	embryonic digit morphogenesis	0.01615
Touch Sensitivity	GO:0006998	nuclear envelope organization	0.02012
Touch Sensitivity	GO:0010559	regulation of glycoprotein biosynthetic ...	0.02012
Touch Sensitivity	GO:0035023	regulation of Rho protein signal transdu...	0.02275
Touch Sensitivity	GO:0050767	regulation of neurogenesis	0.02375
Touch Sensitivity	GO:0009790	embryo development	0.0239
Touch Sensitivity	GO:0051651	maintenance of location in cell	0.02471
Touch Sensitivity	GO:0034612	response to tumor necrosis factor	0.02507
Touch Sensitivity	GO:0042177	negative regulation of protein catabolic...	0.02545
Touch Sensitivity	GO:0051642	centrosome localization	0.02572
Touch Sensitivity	GO:0010657	muscle cell apoptotic process	0.02809
Touch Sensitivity	GO:0000278	mitotic cell cycle	0.02831
Touch Sensitivity	GO:0016236	macroautophagy	0.03
Touch Sensitivity	GO:1902041	regulation of extrinsic apoptotic signal...	0.03042
Touch Sensitivity	GO:0043551	regulation of phosphatidylinositol 3-kin...	0.03045
Touch Sensitivity	GO:0000578	embryonic axis specification	0.03057
Touch Sensitivity	GO:0006677	glycosylceramide metabolic process	0.03057
Touch Sensitivity	GO:0018216	peptidyl-arginine methylation	0.03057
Touch Sensitivity	GO:0019098	reproductive behavior	0.03057
Touch Sensitivity	GO:0031935	regulation of chromatin silencing	0.03057
Touch Sensitivity	GO:0045109	intermediate filament organization	0.03057
Touch Sensitivity	GO:0051151	negative regulation of smooth muscle cel...	0.03057
Touch Sensitivity	GO:2000463	positive regulation of excitatory postsy...	0.03057
Touch Sensitivity	GO:0016571	histone methylation	0.03078
Touch Sensitivity	GO:0009566	fertilization	0.03217
Touch Sensitivity	GO:0048599	oocyte development	0.03652
Touch Sensitivity	GO:0006450	regulation of translational fidelity	0.03669
Touch Sensitivity	GO:0021533	cell differentiation in hindbrain	0.03669
Touch Sensitivity	GO:0035518	histone H2A monoubiquitination	0.03669
Touch Sensitivity	GO:0008625	extrinsic apoptotic signaling pathway vi...	0.04242
Touch Sensitivity	GO:0045104	intermediate filament cytoskeleton organ...	0.04264
Touch Sensitivity	GO:0000729	DNA double-strand break processing	0.04322
Touch Sensitivity	GO:0006929	substrate-dependent cell migration	0.04322
Touch Sensitivity	GO:0031579	membrane raft organization	0.04322
Touch Sensitivity	GO:0035024	negative regulation of Rho protein signa...	0.04322
Touch Sensitivity	GO:0036035	osteoclast development	0.04322
Touch Sensitivity	GO:0051056	regulation of small GTPase mediated sign...	0.04788
Trainability	GO:0046395	carboxylic acid catabolic process	0.00048
Trainability	GO:0031116	positive regulation of microtubule polym...	0.00049
Trainability	GO:0048172	regulation of short-term neuronal synapt...	0.00494
Trainability	GO:0051893	regulation of focal adhesion assembly	0.00545
Trainability	GO:0098742	cell-cell adhesion via plasma-membrane a...	0.00552
Trainability	GO:0048013	ephrin receptor signaling pathway	0.00554
Trainability	GO:0032956	regulation of actin cytoskeleton organiz...	0.01041
Trainability	GO:0006890	retrograde vesicle-mediated transport, G...	0.01082
Trainability	GO:0030212	hyaluronan metabolic process	0.01084
Trainability	GO:0035886	vascular smooth muscle cell differentiat...	0.01084
Trainability	GO:2000114	regulation of establishment of cell pola...	0.01343
Trainability	GO:0003401	axis elongation	0.01634
Trainability	GO:0010765	positive regulation of sodium ion transp...	0.01634
Trainability	GO:0051491	positive regulation of filopodium assemb...	0.01634
Trainability	GO:1901021	positive regulation of calcium ion trans...	0.01634
Trainability	GO:0006406	mRNA export from nucleus	0.01639
Trainability	GO:0031023	microtubule organizing center organizati...	0.018
Trainability	GO:0007411	axon guidance	0.01941
Trainability	GO:0019228	neuronal action potential	0.01957
Trainability	GO:0006886	intracellular protein transport	0.02245
Trainability	GO:0060444	branching involved in mammary gland duct...	0.02312
Trainability	GO:0086019	cell-cell signaling involved in cardiac ...	0.02312
Trainability	GO:1901343	negative regulation of vasculature devel...	0.02513
Trainability	GO:0042594	response to starvation	0.02538
Trainability	GO:0006906	vesicle fusion	0.02648
Trainability	GO:0030032	lamellipodium assembly	0.02671
Trainability	GO:0034260	negative regulation of GTPase activity	0.02701
Trainability	GO:0048843	negative regulation of axon extension in...	0.02701
Trainability	GO:0000045	autophagosome assembly	0.02895
Trainability	GO:0055117	regulation of cardiac muscle contraction	0.03109
Trainability	GO:0007044	cell-substrate junction assembly	0.03178
Trainability	GO:0031122	cytoplasmic microtubule organization	0.03218
Trainability	GO:0060047	heart contraction	0.03236
Trainability	GO:0050684	regulation of mRNA processing	0.03263
Trainability	GO:1904951	positive regulation of establishment of ...	0.03282
Trainability	GO:0019438	aromatic compound biosynthetic process	0.03296
Trainability	GO:0071216	cellular response to biotic stimulus	0.03323
Trainability	GO:0001843	neural tube closure	0.03371
Trainability	GO:0030433	ubiquitin-dependent ERAD pathway	0.03545
Trainability	GO:0055078	sodium ion homeostasis	0.03574
Trainability	GO:0031175	neuron projection development	0.03585
Trainability	GO:0198738	cell-cell signaling by wnt	0.03661
Trainability	GO:0002718	regulation of cytokine production involv...	0.03685
Trainability	GO:0060760	positive regulation of response to cytok...	0.03692
Trainability	GO:0030260	entry into host cell	0.03694
Trainability	GO:0006875	cellular metal ion homeostasis	0.04028
Trainability	GO:0035196	production of miRNAs involved in gene si...	0.04059
Trainability	GO:0060325	face morphogenesis	0.04059
Trainability	GO:0031047	gene silencing by RNA	0.04086
Trainability	GO:2000249	regulation of actin cytoskeleton reorgan...	0.04086
Trainability	GO:0007420	brain development	0.04185
Trainability	GO:0003006	developmental process involved in reprod...	0.04239
Trainability	GO:0051865	protein autoubiquitination	0.04635
Trainability	GO:0016236	macroautophagy	0.04959
Trainability	GO:0098659	inorganic cation import across plasma me...	0.04977
Trainability	GO:0007099	centriole replication	0.04988

## Sheet: Table S7
Table S7. Genes associated with behavioral traits at p ≤ 0.05 after Bonferroni correction, using SNPs mapped to the nearest gene within 20kb to derive gene-level p values (meta-analysis, Fisher’s method).
Behavior	Ensemble ID	Gene Name	p
Attach & Atn Seeking	ENSCAFG00000023562	DMD	< 0.00001
Attach & Atn Seeking	ENSCAFG00000018100	SCAPER	< 0.00001
Attach & Atn Seeking	ENSCAFG00000005914	TMTC2	< 0.00001
Attach & Atn Seeking	ENSCAFG00000000353	STXBP5	< 0.00001
Attach & Atn Seeking	ENSCAFG00000013297	IGF2BP2	< 0.00001
Attach & Atn Seeking	ENSCAFG00000012413	RPS6KC1	< 0.00001
Attach & Atn Seeking	ENSCAFG00000006625	SFSWAP	< 0.00001
Attach & Atn Seeking	ENSCAFG00000007301	CWC27	< 0.00001
Attach & Atn Seeking	ENSCAFG00000000678	ZFPM2	< 0.00001
Attach & Atn Seeking	ENSCAFG00000000345	SRGAP1	< 0.00001
Attach & Atn Seeking	ENSCAFG00000000157	DCC	< 0.00001
Attach & Atn Seeking	ENSCAFG00000006743	PCMTD1	< 0.00001
Attach & Atn Seeking	ENSCAFG00000007500	SBF2	< 0.00001
Attach & Atn Seeking	ENSCAFG00000003988	SPATA5	< 0.00001
Attach & Atn Seeking	ENSCAFG00000002271	PHF14	< 0.00001
Attach & Atn Seeking	ENSCAFG00000007380	STAG1	< 0.00001
Attach & Atn Seeking	ENSCAFG00000000945	MAN1A1	< 0.00001
Attach & Atn Seeking	ENSCAFG00000018577	XIAP	< 0.00001
Attach & Atn Seeking	ENSCAFG00000010384	DNAH7	< 0.00001
Attach & Atn Seeking	ENSCAFG00000003678	CCNY	< 0.00001
Attach & Atn Seeking	ENSCAFG00000000677	LRP12	< 0.00001
Attach & Atn Seeking	ENSCAFG00000013823	SPECC1L	< 0.00001
Attach & Atn Seeking	ENSCAFG00000040856		< 0.00001
Attach & Atn Seeking	ENSCAFG00000017716	EEF2K	< 0.00001
Attach & Atn Seeking	ENSCAFG00000003570	FBXW2	< 0.00001
Attach & Atn Seeking	ENSCAFG00000016354	STIM2	< 0.00001
Attach & Atn Seeking	ENSCAFG00000013852	MATN2	1e-05
Attach & Atn Seeking	ENSCAFG00000001700	SND1	1e-05
Attach & Atn Seeking	ENSCAFG00000029666	HNRNPLL	3e-05
Attach & Atn Seeking	ENSCAFG00000005326	UVRAG	3e-05
Attach & Atn Seeking	ENSCAFG00000009207	AP3B1	4e-05
Attach & Atn Seeking	ENSCAFG00000013221	CTNNA3	6e-05
Attach & Atn Seeking	ENSCAFG00000005192	ACER3	0.0001
Attach & Atn Seeking	ENSCAFG00000009390	PPP3CC	0.00012
Attach & Atn Seeking	ENSCAFG00000034953		0.00013
Attach & Atn Seeking	ENSCAFG00000000828	RPS6KA2	0.00014
Attach & Atn Seeking	ENSCAFG00000001889	GABRB1	0.00016
Attach & Atn Seeking	ENSCAFG00000032548	KCNH5	0.00018
Attach & Atn Seeking	ENSCAFG00000000938	MCM9	0.00019
Attach & Atn Seeking	ENSCAFG00000003701	ATG5	0.00023
Attach & Atn Seeking	ENSCAFG00000006266	ARHGAP26	0.00028
Attach & Atn Seeking	ENSCAFG00000018564	GRIA3	0.00079
Attach & Atn Seeking	ENSCAFG00000003737	PARD3	0.00094
Attach & Atn Seeking	ENSCAFG00000018267	TOP3A	0.00102
Attach & Atn Seeking	ENSCAFG00000009088	NUP93	0.00122
Attach & Atn Seeking	ENSCAFG00000005766	SYT1	0.00133
Attach & Atn Seeking	ENSCAFG00000001852	ADAM22	0.00139
Attach & Atn Seeking	ENSCAFG00000007963	BLK	0.0015
Attach & Atn Seeking	ENSCAFG00000009609	TMEM117	0.00158
Attach & Atn Seeking	ENSCAFG00000003322	IFRD1	0.00186
Attach & Atn Seeking	ENSCAFG00000010140	BICDL1	0.00436
Attach & Atn Seeking	ENSCAFG00000008568	AGPAT5	0.00458
Attach & Atn Seeking	ENSCAFG00000035923		0.00476
Attach & Atn Seeking	ENSCAFG00000004182	ZC3H4	0.00499
Attach & Atn Seeking	ENSCAFG00000040232		0.00515
Attach & Atn Seeking	ENSCAFG00000034328		0.00575
Attach & Atn Seeking	ENSCAFG00000000935	CEP85L	0.00729
Attach & Atn Seeking	ENSCAFG00000005720	CLPB	0.00876
Attach & Atn Seeking	ENSCAFG00000003651	CSMD2	0.01188
Attach & Atn Seeking	ENSCAFG00000003334	ABCA13	0.0152
Attach & Atn Seeking	ENSCAFG00000005054	ZRANB3	0.01557
Attach & Atn Seeking	ENSCAFG00000010457	RIPOR2	0.01736
Attach & Atn Seeking	ENSCAFG00000029250	CDK13	0.01789
Attach & Atn Seeking	ENSCAFG00000001930	PGM5	0.0226
Attach & Atn Seeking	ENSCAFG00000007770	LNPEP	0.02354
Attach & Atn Seeking	ENSCAFG00000029394	HAS2	0.02359
Attach & Atn Seeking	ENSCAFG00000008501	PPEF2	0.02391
Attach & Atn Seeking	ENSCAFG00000009840	FAM13A	0.02414
Attach & Atn Seeking	ENSCAFG00000005373	SLC24A3	0.02592
Attach & Atn Seeking	ENSCAFG00000010811	LRRC28	0.03072
Attach & Atn Seeking	ENSCAFG00000020112	ABCD3	0.03504
Attach & Atn Seeking	ENSCAFG00000009427	PTPN13	0.04488
Attach & Atn Seeking	ENSCAFG00000001425	GKAP1	0.04725
Attach & Atn Seeking	ENSCAFG00000010984	VTI1A	0.04773
Attach & Atn Seeking	ENSCAFG00000007620	PREX2	0.04874
Chasing	ENSCAFG00000003554	ASCC3	< 0.00001
Chasing	ENSCAFG00000000670	RIMS2	< 0.00001
Chasing	ENSCAFG00000008141	FBXW7	< 0.00001
Chasing	ENSCAFG00000018720	ATG4C	< 0.00001
Chasing	ENSCAFG00000005849	TBC1D5	< 0.00001
Chasing	ENSCAFG00000006568	ARHGAP22	< 0.00001
Chasing	ENSCAFG00000014845	FAM193A	< 0.00001
Chasing	ENSCAFG00000005998	LHFPL6	< 0.00001
Chasing	ENSCAFG00000003553	CADPS2	< 0.00001
Chasing	ENSCAFG00000018081	SPECC1	< 0.00001
Chasing	ENSCAFG00000011773	C6H7orf50	< 0.00001
Chasing	ENSCAFG00000010354	NT5C2	< 0.00001
Chasing	ENSCAFG00000002155		< 0.00001
Chasing	ENSCAFG00000034837		< 0.00001
Chasing	ENSCAFG00000000770		< 0.00001
Chasing	ENSCAFG00000002316	MLIP	< 0.00001
Chasing	ENSCAFG00000030939		< 0.00001
Chasing	ENSCAFG00000002562	COL19A1	< 0.00001
Chasing	ENSCAFG00000014682	HTT	< 0.00001
Chasing	ENSCAFG00000014403	SORCS2	< 0.00001
Chasing	ENSCAFG00000008886	FGF5	< 0.00001
Chasing	ENSCAFG00000014975	EIF4G3	< 0.00001
Chasing	ENSCAFG00000006920	KCNIP3	1e-05
Chasing	ENSCAFG00000004986	GDPD4	1e-05
Chasing	ENSCAFG00000009831	PRMT3	4e-05
Chasing	ENSCAFG00000007152	PTPRG	4e-05
Chasing	ENSCAFG00000003580	GRIK2	4e-05
Chasing	ENSCAFG00000020373	USP33	5e-05
Chasing	ENSCAFG00000004817	ELF1	6e-05
Chasing	ENSCAFG00000010034	RYR2	7e-05
Chasing	ENSCAFG00000015345	CC2D2A	7e-05
Chasing	ENSCAFG00000008123	TENM3	9e-05
Chasing	ENSCAFG00000007246	CYP7B1	0.00016
Chasing	ENSCAFG00000000677	LRP12	0.00017
Chasing	ENSCAFG00000038312		0.00017
Chasing	ENSCAFG00000009924	TAOK3	0.00019
Chasing	ENSCAFG00000010744	NAV1	0.00025
Chasing	ENSCAFG00000000459	TBC1D15	0.00028
Chasing	ENSCAFG00000003176	DPY19L2	0.00042
Chasing	ENSCAFG00000038858		0.0005
Chasing	ENSCAFG00000000353	STXBP5	0.00054
Chasing	ENSCAFG00000031408	CFAP299	0.00055
Chasing	ENSCAFG00000034423		0.00066
Chasing	ENSCAFG00000029135	GDNF	0.00098
Chasing	ENSCAFG00000002081	CDC37L1	0.00109
Chasing	ENSCAFG00000003927	ELAVL4	0.00127
Chasing	ENSCAFG00000000011	NFATC1	0.0014
Chasing	ENSCAFG00000002083		0.00145
Chasing	ENSCAFG00000007009	TMEM68	0.00165
Chasing	ENSCAFG00000002271	PHF14	0.00165
Chasing	ENSCAFG00000010822	ACTN2	0.00185
Chasing	ENSCAFG00000012156	ARSJ	0.00199
Chasing	ENSCAFG00000004535	NR2C2	0.00216
Chasing	ENSCAFG00000038915		0.00268
Chasing	ENSCAFG00000036400		0.00335
Chasing	ENSCAFG00000016428	ARG2	0.00387
Chasing	ENSCAFG00000008185	ARFIP1	0.0042
Chasing	ENSCAFG00000003778	AFG1L	0.00472
Chasing	ENSCAFG00000018181		0.00514
Chasing	ENSCAFG00000013247	PRR14L	0.00537
Chasing	ENSCAFG00000006293	NR3C1	0.00645
Chasing	ENSCAFG00000006255	NBEA	0.00655
Chasing	ENSCAFG00000010226	CDKAL1	0.00664
Chasing	ENSCAFG00000017519	TNMD	0.007
Chasing	ENSCAFG00000010000	C27H12orf40	0.00844
Chasing	ENSCAFG00000035216		0.00891
Chasing	ENSCAFG00000017167	KCNN3	0.01
Chasing	ENSCAFG00000033376		0.01033
Chasing	ENSCAFG00000011155	STARD9	0.01171
Chasing	ENSCAFG00000012781	XPR1	0.01231
Chasing	ENSCAFG00000003663	GSN	0.01233
Chasing	ENSCAFG00000002941	ME1	0.01565
Chasing	ENSCAFG00000010114	CIT	0.01607
Chasing	ENSCAFG00000015800	MYO5A	0.01664
Chasing	ENSCAFG00000007698	ZNF827	0.01726
Chasing	ENSCAFG00000004406	FBLN2	0.01887
Chasing	ENSCAFG00000013067	PAK2	0.02479
Chasing	ENSCAFG00000040257		0.02724
Chasing	ENSCAFG00000006655	ADGRD1	0.02745
Chasing	ENSCAFG00000010735	GRAMD1C	0.02932
Chasing	ENSCAFG00000011688	TRUB1	0.03313
Chasing	ENSCAFG00000007822	BDP1	0.0392
Chasing	ENSCAFG00000006376		0.03925
Chasing	ENSCAFG00000015232	ZNF182	0.04206
Chasing	ENSCAFG00000011148	RGS9	0.04306
Chasing	ENSCAFG00000013239	SCRN3	0.04462
Chasing	ENSCAFG00000017262	MYH10	0.04874
Dog Aggression	ENSCAFG00000009924	TAOK3	< 0.00001
Dog Aggression	ENSCAFG00000023804	HERC3	< 0.00001
Dog Aggression	ENSCAFG00000031429	GNA14	< 0.00001
Dog Aggression	ENSCAFG00000002155		< 0.00001
Dog Aggression	ENSCAFG00000018100	SCAPER	< 0.00001
Dog Aggression	ENSCAFG00000009911	FBXW4	< 0.00001
Dog Aggression	ENSCAFG00000018864	GPC3	< 0.00001
Dog Aggression	ENSCAFG00000024350	CENPP	< 0.00001
Dog Aggression	ENSCAFG00000023460	FBRSL1	< 0.00001
Dog Aggression	ENSCAFG00000020112	ABCD3	< 0.00001
Dog Aggression	ENSCAFG00000001010	PPP2CA	< 0.00001
Dog Aggression	ENSCAFG00000015679	RGS7	< 0.00001
Dog Aggression	ENSCAFG00000001016	TRDN	< 0.00001
Dog Aggression	ENSCAFG00000008431	C30H15orf41	< 0.00001
Dog Aggression	ENSCAFG00000011936	TRPM8	< 0.00001
Dog Aggression	ENSCAFG00000014222	IFT80	< 0.00001
Dog Aggression	ENSCAFG00000000678	ZFPM2	1e-05
Dog Aggression	ENSCAFG00000001935	AKAP9	1e-05
Dog Aggression	ENSCAFG00000018850	HS6ST2	1e-05
Dog Aggression	ENSCAFG00000002364	ADGRL3	2e-05
Dog Aggression	ENSCAFG00000006196	CPNE4	2e-05
Dog Aggression	ENSCAFG00000010941	SLC24A4	2e-05
Dog Aggression	ENSCAFG00000015803	SDCCAG8	2e-05
Dog Aggression	ENSCAFG00000009842	OPCML	7e-05
Dog Aggression	ENSCAFG00000010772	GAL	0.00017
Dog Aggression	ENSCAFG00000006766	DLC1	0.00027
Dog Aggression	ENSCAFG00000008557	APP	0.00028
Dog Aggression	ENSCAFG00000033673		0.00042
Dog Aggression	ENSCAFG00000009771	TTC3	0.00049
Dog Aggression	ENSCAFG00000015700	STX18	0.00077
Dog Aggression	ENSCAFG00000007364	KLKB1	0.00119
Dog Aggression	ENSCAFG00000009831	PRMT3	0.00149
Dog Aggression	ENSCAFG00000007822	BDP1	0.0015
Dog Aggression	ENSCAFG00000013733	GATM	0.00161
Dog Aggression	ENSCAFG00000019194	SLC43A2	0.00199
Dog Aggression	ENSCAFG00000002390	FAM178B	0.002
Dog Aggression	ENSCAFG00000000239	PDE7B	0.00237
Dog Aggression	ENSCAFG00000000079	RELCH	0.00239
Dog Aggression	ENSCAFG00000028659		0.00248
Dog Aggression	ENSCAFG00000009327	ADGRG7	0.00287
Dog Aggression	ENSCAFG00000011544	AOX4	0.00361
Dog Aggression	ENSCAFG00000014845	FAM193A	0.00411
Dog Aggression	ENSCAFG00000000935	CEP85L	0.00428
Dog Aggression	ENSCAFG00000007235	HIPK3	0.00443
Dog Aggression	ENSCAFG00000004731	TENM4	0.00465
Dog Aggression	ENSCAFG00000028870	RAB6A	0.00592
Dog Aggression	ENSCAFG00000039775		0.00713
Dog Aggression	ENSCAFG00000007251	KRT5	0.00842
Dog Aggression	ENSCAFG00000007803	GALNTL6	0.00855
Dog Aggression	ENSCAFG00000004872	PTPN4	0.01241
Dog Aggression	ENSCAFG00000005040	KLF12	0.01357
Dog Aggression	ENSCAFG00000004436	RB1	0.01389
Dog Aggression	ENSCAFG00000016949	ALOXE3	0.01423
Dog Aggression	ENSCAFG00000011430	STXBP5L	0.01608
Dog Aggression	ENSCAFG00000020012	PKD1L2	0.01668
Dog Aggression	ENSCAFG00000013004	CACNA1E	0.01783
Dog Aggression	ENSCAFG00000035815		0.02105
Dog Aggression	ENSCAFG00000015343	DCAF6	0.02202
Dog Aggression	ENSCAFG00000001355	KIAA2026	0.02298
Dog Aggression	ENSCAFG00000013678	MBIP	0.02462
Dog Aggression	ENSCAFG00000030076	LMX1B	0.02678
Dog Aggression	ENSCAFG00000005423	STT3B	0.0274
Dog Aggression	ENSCAFG00000002323	MGAT4A	0.02843
Dog Aggression	ENSCAFG00000010766	TESMIN	0.03028
Dog Aggression	ENSCAFG00000013057	MAP3K15	0.03782
Dog Aggression	ENSCAFG00000030145	AUH	0.0393
Dog Aggression	ENSCAFG00000004282	WDFY2	0.04343
Dog Aggression	ENSCAFG00000000364	WIF1	0.04865
Dog Aggression	ENSCAFG00000014569	PDCD10	0.04909
Dog Fear	ENSCAFG00000008827	ALMS1	< 0.00001
Dog Fear	ENSCAFG00000013297	IGF2BP2	< 0.00001
Dog Fear	ENSCAFG00000011430	STXBP5L	< 0.00001
Dog Fear	ENSCAFG00000009207	AP3B1	< 0.00001
Dog Fear	ENSCAFG00000002257	ICA1	< 0.00001
Dog Fear	ENSCAFG00000009242	FILIP1L	< 0.00001
Dog Fear	ENSCAFG00000040856		< 0.00001
Dog Fear	ENSCAFG00000028659		< 0.00001
Dog Fear	ENSCAFG00000009390	PPP3CC	< 0.00001
Dog Fear	ENSCAFG00000005692	RPTOR	< 0.00001
Dog Fear	ENSCAFG00000018100	SCAPER	< 0.00001
Dog Fear	ENSCAFG00000006592	STK32A	< 0.00001
Dog Fear	ENSCAFG00000006248	CHL1	< 0.00001
Dog Fear	ENSCAFG00000005699	DNAJC18	< 0.00001
Dog Fear	ENSCAFG00000000334	ADAMTS2	< 0.00001
Dog Fear	ENSCAFG00000031408	CFAP299	< 0.00001
Dog Fear	ENSCAFG00000000945	MAN1A1	< 0.00001
Dog Fear	ENSCAFG00000013228	CNKSR2	< 0.00001
Dog Fear	ENSCAFG00000003657	NBAS	< 0.00001
Dog Fear	ENSCAFG00000004436	RB1	< 0.00001
Dog Fear	ENSCAFG00000004586	RSU1	< 0.00001
Dog Fear	ENSCAFG00000003373	DGKI	1e-05
Dog Fear	ENSCAFG00000017453	INTS3	3e-05
Dog Fear	ENSCAFG00000000932	SLC35F1	4e-05
Dog Fear	ENSCAFG00000001277	ANKS1A	9e-05
Dog Fear	ENSCAFG00000010811	LRRC28	9e-05
Dog Fear	ENSCAFG00000001002	SMPDL3A	9e-05
Dog Fear	ENSCAFG00000008279	PTPRJ	9e-05
Dog Fear	ENSCAFG00000016811	RHBG	0.0001
Dog Fear	ENSCAFG00000001879	NUAK1	0.0001
Dog Fear	ENSCAFG00000006743	PCMTD1	0.00012
Dog Fear	ENSCAFG00000009270	PEBP4	0.00013
Dog Fear	ENSCAFG00000035994		0.00015
Dog Fear	ENSCAFG00000004799	GBX1	0.00032
Dog Fear	ENSCAFG00000017298	MAP2K1	0.00042
Dog Fear	ENSCAFG00000017932	ARID3B	0.00056
Dog Fear	ENSCAFG00000033403		0.00057
Dog Fear	ENSCAFG00000033988		0.00066
Dog Fear	ENSCAFG00000001646	PRUNE2	0.00074
Dog Fear	ENSCAFG00000012344	FASTKD1	0.00078
Dog Fear	ENSCAFG00000033910		0.00084
Dog Fear	ENSCAFG00000005061	LMO7	0.00114
Dog Fear	ENSCAFG00000002848	BCKDHB	0.0012
Dog Fear	ENSCAFG00000032976		0.00124
Dog Fear	ENSCAFG00000012967	PCYT1A	0.00138
Dog Fear	ENSCAFG00000013995	CABIN1	0.0015
Dog Fear	ENSCAFG00000020135	FNBP1L	0.00159
Dog Fear	ENSCAFG00000008370	RNF13	0.00174
Dog Fear	ENSCAFG00000008101	PLOD2	0.00185
Dog Fear	ENSCAFG00000029740	MSRB3	0.00225
Dog Fear	ENSCAFG00000014670		0.00244
Dog Fear	ENSCAFG00000011155	STARD9	0.00288
Dog Fear	ENSCAFG00000000361	TBC1D30	0.00307
Dog Fear	ENSCAFG00000006264	PCLO	0.00315
Dog Fear	ENSCAFG00000002096	UXS1	0.00327
Dog Fear	ENSCAFG00000011680	ATP11B	0.00335
Dog Fear	ENSCAFG00000015787	PPP2R5E	0.00391
Dog Fear	ENSCAFG00000010766	TESMIN	0.00399
Dog Fear	ENSCAFG00000005814	RAB5A	0.00488
Dog Fear	ENSCAFG00000014989	WDHD1	0.00502
Dog Fear	ENSCAFG00000000345	SRGAP1	0.00512
Dog Fear	ENSCAFG00000004369	NOX4	0.00543
Dog Fear	ENSCAFG00000023549	C9orf3	0.00613
Dog Fear	ENSCAFG00000010536	CARMIL1	0.00615
Dog Fear	ENSCAFG00000036543		0.0071
Dog Fear	ENSCAFG00000003334	ABCA13	0.0071
Dog Fear	ENSCAFG00000011756	PLXNA2	0.00763
Dog Fear	ENSCAFG00000000678	ZFPM2	0.01058
Dog Fear	ENSCAFG00000007533	ANKRD27	0.01077
Dog Fear	ENSCAFG00000000430	ESR1	0.01091
Dog Fear	ENSCAFG00000004568	CUBN	0.01173
Dog Fear	ENSCAFG00000010745	IGHMBP2	0.01582
Dog Fear	ENSCAFG00000037826		0.02303
Dog Fear	ENSCAFG00000013246	LIPH	0.02451
Dog Fear	ENSCAFG00000015422	KIAA0753	0.02493
Dog Fear	ENSCAFG00000030873		0.02561
Dog Fear	ENSCAFG00000032716	EMCN	0.02781
Dog Fear	ENSCAFG00000008276	HLTF	0.03036
Dog Fear	ENSCAFG00000002372	ZNF135	0.03058
Dog Fear	ENSCAFG00000010102	SEMA5A	0.03287
Dog Fear	ENSCAFG00000019473	PRDM16	0.03744
Dog Fear	ENSCAFG00000002390	FAM178B	0.0419
Dog Fear	ENSCAFG00000014255		0.04258
Dog Fear	ENSCAFG00000006042	SLC23A2	0.04769
Dog Rivalry	ENSCAFG00000039058		< 0.00001
Dog Rivalry	ENSCAFG00000008909	CNBD1	< 0.00001
Dog Rivalry	ENSCAFG00000028659		< 0.00001
Dog Rivalry	ENSCAFG00000016111	FOXK1	< 0.00001
Dog Rivalry	ENSCAFG00000020112	ABCD3	< 0.00001
Dog Rivalry	ENSCAFG00000005040	KLF12	< 0.00001
Dog Rivalry	ENSCAFG00000017651	DNM2	< 0.00001
Dog Rivalry	ENSCAFG00000003005	CREB5	< 0.00001
Dog Rivalry	ENSCAFG00000001358	AGTPBP1	< 0.00001
Dog Rivalry	ENSCAFG00000017996	ACACA	< 0.00001
Dog Rivalry	ENSCAFG00000019514	NPHP4	< 0.00001
Dog Rivalry	ENSCAFG00000005862	PLCL2	< 0.00001
Dog Rivalry	ENSCAFG00000039648		< 0.00001
Dog Rivalry	ENSCAFG00000012413	RPS6KC1	< 0.00001
Dog Rivalry	ENSCAFG00000030938		< 0.00001
Dog Rivalry	ENSCAFG00000016200	TCF12	1e-05
Dog Rivalry	ENSCAFG00000001630	MYH9	1e-05
Dog Rivalry	ENSCAFG00000030539		2e-05
Dog Rivalry	ENSCAFG00000004343	EFCC1	2e-05
Dog Rivalry	ENSCAFG00000001646	PRUNE2	3e-05
Dog Rivalry	ENSCAFG00000002413	DST	4e-05
Dog Rivalry	ENSCAFG00000017293	CEP128	5e-05
Dog Rivalry	ENSCAFG00000002271	PHF14	6e-05
Dog Rivalry	ENSCAFG00000014222	IFT80	0.00014
Dog Rivalry	ENSCAFG00000031628		0.00016
Dog Rivalry	ENSCAFG00000005549	UCP3	0.00016
Dog Rivalry	ENSCAFG00000009831	PRMT3	0.00021
Dog Rivalry	ENSCAFG00000019133	MTMR1	0.00022
Dog Rivalry	ENSCAFG00000007803	GALNTL6	0.00025
Dog Rivalry	ENSCAFG00000000086	CDH20	0.00028
Dog Rivalry	ENSCAFG00000012638	DPP3	0.00028
Dog Rivalry	ENSCAFG00000002663	CD109	0.00031
Dog Rivalry	ENSCAFG00000001166	KHDRBS3	0.00037
Dog Rivalry	ENSCAFG00000033142		0.00037
Dog Rivalry	ENSCAFG00000005809	TM9SF2	0.00039
Dog Rivalry	ENSCAFG00000012545	CARF	0.00042
Dog Rivalry	ENSCAFG00000016354	STIM2	0.00055
Dog Rivalry	ENSCAFG00000024975	GRXCR1	0.00055
Dog Rivalry	ENSCAFG00000002390	FAM178B	0.00056
Dog Rivalry	ENSCAFG00000018890	TXNDC11	0.00066
Dog Rivalry	ENSCAFG00000010677	EYA2	0.00097
Dog Rivalry	ENSCAFG00000012804	MACO1	0.00141
Dog Rivalry	ENSCAFG00000033819		0.00185
Dog Rivalry	ENSCAFG00000011176	NR5A2	0.0022
Dog Rivalry	ENSCAFG00000040595		0.00424
Dog Rivalry	ENSCAFG00000005405	SEC23B	0.00429
Dog Rivalry	ENSCAFG00000013057	MAP3K15	0.00441
Dog Rivalry	ENSCAFG00000010224		0.00443
Dog Rivalry	ENSCAFG00000003420	VRK3	0.00448
Dog Rivalry	ENSCAFG00000035258		0.00457
Dog Rivalry	ENSCAFG00000006462	UBXN8	0.00477
Dog Rivalry	ENSCAFG00000003995	FYN	0.00502
Dog Rivalry	ENSCAFG00000031241	LRRC55	0.00522
Dog Rivalry	ENSCAFG00000015255	SLC35F4	0.00528
Dog Rivalry	ENSCAFG00000013733	GATM	0.00562
Dog Rivalry	ENSCAFG00000002640	RIMS1	0.00575
Dog Rivalry	ENSCAFG00000000719	NUDCD1	0.00589
Dog Rivalry	ENSCAFG00000023912	LYG2	0.00593
Dog Rivalry	ENSCAFG00000033917		0.00599
Dog Rivalry	ENSCAFG00000007575	DPY19L3	0.00768
Dog Rivalry	ENSCAFG00000000655	TMEM181	0.00816
Dog Rivalry	ENSCAFG00000020080	PTBP2	0.00832
Dog Rivalry	ENSCAFG00000004855	EPB41L5	0.00868
Dog Rivalry	ENSCAFG00000010267	RAP1GDS1	0.00886
Dog Rivalry	ENSCAFG00000003467	FBXL4	0.00909
Dog Rivalry	ENSCAFG00000011983	HSPBAP1	0.00957
Dog Rivalry	ENSCAFG00000024350	CENPP	0.01039
Dog Rivalry	ENSCAFG00000011544	AOX4	0.0105
Dog Rivalry	ENSCAFG00000000678	ZFPM2	0.01104
Dog Rivalry	ENSCAFG00000010942	CCDC91	0.01675
Dog Rivalry	ENSCAFG00000005121	SFMBT2	0.01852
Dog Rivalry	ENSCAFG00000003749	SLC7A11	0.02541
Dog Rivalry	ENSCAFG00000008407	EIF2A	0.02618
Dog Rivalry	ENSCAFG00000005873	RFTN1	0.02628
Dog Rivalry	ENSCAFG00000008185	ARFIP1	0.02679
Dog Rivalry	ENSCAFG00000007494	SGTB	0.03131
Dog Rivalry	ENSCAFG00000014062	FANCM	0.03165
Dog Rivalry	ENSCAFG00000036254		0.03286
Dog Rivalry	ENSCAFG00000035994		0.03859
Dog Rivalry	ENSCAFG00000003553	CADPS2	0.04846
Energy	ENSCAFG00000003737	PARD3	< 0.00001
Energy	ENSCAFG00000001106	LAMA2	< 0.00001
Energy	ENSCAFG00000001700	SND1	< 0.00001
Energy	ENSCAFG00000009699	CHD9	< 0.00001
Energy	ENSCAFG00000018849	SNX29	< 0.00001
Energy	ENSCAFG00000023267	PRIM2	< 0.00001
Energy	ENSCAFG00000007301	CWC27	< 0.00001
Energy	ENSCAFG00000008199	FMN1	< 0.00001
Energy	ENSCAFG00000000430	ESR1	< 0.00001
Energy	ENSCAFG00000018024	TRAPPC8	< 0.00001
Energy	ENSCAFG00000009971	ARMH3	< 0.00001
Energy	ENSCAFG00000006625	SFSWAP	< 0.00001
Energy	ENSCAFG00000001154	MRTFA	< 0.00001
Energy	ENSCAFG00000006812	TMEM132D	< 0.00001
Energy	ENSCAFG00000013221	CTNNA3	< 0.00001
Energy	ENSCAFG00000018850	HS6ST2	< 0.00001
Energy	ENSCAFG00000018564	GRIA3	1e-05
Energy	ENSCAFG00000008790	CTNNBL1	1e-05
Energy	ENSCAFG00000008211	CACNA2D3	1e-05
Energy	ENSCAFG00000018952	ARHGEF6	1e-05
Energy	ENSCAFG00000013228	CNKSR2	1e-05
Energy	ENSCAFG00000007520	CBR4	1e-05
Energy	ENSCAFG00000007586	MAST4	4e-05
Energy	ENSCAFG00000014257	PPP2R2C	4e-05
Energy	ENSCAFG00000014916	FAM227B	4e-05
Energy	ENSCAFG00000018857	GPC4	5e-05
Energy	ENSCAFG00000025529	TPK1	5e-05
Energy	ENSCAFG00000013749	CUX1	5e-05
Energy	ENSCAFG00000011082	CAMSAP2	5e-05
Energy	ENSCAFG00000038915		7e-05
Energy	ENSCAFG00000008684	SLC4A5	8e-05
Energy	ENSCAFG00000006764	PARG	0.0001
Energy	ENSCAFG00000032743		0.0001
Energy	ENSCAFG00000001234	UHRF1BP1	0.00013
Energy	ENSCAFG00000018996	CDH10	0.00013
Energy	ENSCAFG00000016531	ADGRA3	0.00014
Energy	ENSCAFG00000000557	CSNK1G3	0.00019
Energy	ENSCAFG00000000011	NFATC1	0.00019
Energy	ENSCAFG00000012098	PGBD5	0.0002
Energy	ENSCAFG00000003663	GSN	0.00024
Energy	ENSCAFG00000038846		0.00025
Energy	ENSCAFG00000029157	NOVA1	0.00033
Energy	ENSCAFG00000002028	VLDLR	0.00051
Energy	ENSCAFG00000039266		0.00056
Energy	ENSCAFG00000001425	GKAP1	0.00056
Energy	ENSCAFG00000032608	LURAP1L	0.00058
Energy	ENSCAFG00000015604	ILDR2	0.00072
Energy	ENSCAFG00000002414	AGMO	0.0008
Energy	ENSCAFG00000014454	ATM	0.00085
Energy	ENSCAFG00000008056	RYR3	0.00089
Energy	ENSCAFG00000036039		0.00091
Energy	ENSCAFG00000010355	ICE1	0.00148
Energy	ENSCAFG00000012544	COPA	0.00161
Energy	ENSCAFG00000003161	BBS9	0.00197
Energy	ENSCAFG00000001852	ADAM22	0.00285
Energy	ENSCAFG00000002640	RIMS1	0.00312
Energy	ENSCAFG00000004290	SAP130	0.00329
Energy	ENSCAFG00000012360	ALS2	0.00374
Energy	ENSCAFG00000013114	RGSL1	0.00383
Energy	ENSCAFG00000003370	ASAP2	0.00531
Energy	ENSCAFG00000002364	ADGRL3	0.00549
Energy	ENSCAFG00000013852	MATN2	0.0062
Energy	ENSCAFG00000007907	LRBA	0.00706
Energy	ENSCAFG00000008284	EXTL3	0.00806
Energy	ENSCAFG00000029142	C4H5orf51	0.00898
Energy	ENSCAFG00000033883		0.01047
Energy	ENSCAFG00000015351	BAIAP2L1	0.0105
Energy	ENSCAFG00000004479	ANO10	0.01271
Energy	ENSCAFG00000038646		0.01357
Energy	ENSCAFG00000032548	KCNH5	0.01389
Energy	ENSCAFG00000002045		0.01486
Energy	ENSCAFG00000005330	SH2D4A	0.01564
Energy	ENSCAFG00000011150	GALNT17	0.01752
Energy	ENSCAFG00000018351	ENOSF1	0.0178
Energy	ENSCAFG00000014046	RASAL2	0.01798
Energy	ENSCAFG00000028579	RTN4RL1	0.01843
Energy	ENSCAFG00000000275	NHSL1	0.02091
Energy	ENSCAFG00000002025	GCC2	0.02136
Energy	ENSCAFG00000008293	FZD3	0.02149
Energy	ENSCAFG00000003322	IFRD1	0.02301
Energy	ENSCAFG00000015422	KIAA0753	0.02326
Energy	ENSCAFG00000008039	DIP2B	0.02378
Energy	ENSCAFG00000014349	TBC1D14	0.0253
Energy	ENSCAFG00000009839	CD101	0.02885
Energy	ENSCAFG00000023072	POC1A	0.02961
Energy	ENSCAFG00000017349	STXBP4	0.03253
Energy	ENSCAFG00000018175	CAPN6	0.03302
Energy	ENSCAFG00000036812		0.04009
Energy	ENSCAFG00000007240	IPO11	0.04013
Energy	ENSCAFG00000005054	ZRANB3	0.04271
Energy	ENSCAFG00000019556	RABL6	0.04661
Energy	ENSCAFG00000013324	LRP6	0.047
Excitability	ENSCAFG00000017252	ATRX	< 0.00001
Excitability	ENSCAFG00000007650	NEK1	< 0.00001
Excitability	ENSCAFG00000038256		< 0.00001
Excitability	ENSCAFG00000005914	TMTC2	< 0.00001
Excitability	ENSCAFG00000007301	CWC27	< 0.00001
Excitability	ENSCAFG00000006732	PXDNL	< 0.00001
Excitability	ENSCAFG00000006743	PCMTD1	< 0.00001
Excitability	ENSCAFG00000004087	MAML2	< 0.00001
Excitability	ENSCAFG00000009849	SPTBN5	< 0.00001
Excitability	ENSCAFG00000013607	PDE11A	< 0.00001
Excitability	ENSCAFG00000007007	ATP8A2	< 0.00001
Excitability	ENSCAFG00000008352	PHF20	< 0.00001
Excitability	ENSCAFG00000006764	PARG	< 0.00001
Excitability	ENSCAFG00000023079	AFF3	< 0.00001
Excitability	ENSCAFG00000009662	MGA	< 0.00001
Excitability	ENSCAFG00000000070	PHLPP1	1e-05
Excitability	ENSCAFG00000014916	FAM227B	1e-05
Excitability	ENSCAFG00000004160	TNIP3	1e-05
Excitability	ENSCAFG00000024647	SERPINB5	1e-05
Excitability	ENSCAFG00000001557	CCDC171	2e-05
Excitability	ENSCAFG00000000935	CEP85L	2e-05
Excitability	ENSCAFG00000004535	NR2C2	3e-05
Excitability	ENSCAFG00000006625	SFSWAP	5e-05
Excitability	ENSCAFG00000007963	BLK	5e-05
Excitability	ENSCAFG00000000337	PPM1H	0.00011
Excitability	ENSCAFG00000005373	SLC24A3	0.00011
Excitability	ENSCAFG00000035101		0.00015
Excitability	ENSCAFG00000011212	PIK3CA	0.00015
Excitability	ENSCAFG00000005054	ZRANB3	0.00016
Excitability	ENSCAFG00000032470		0.00028
Excitability	ENSCAFG00000031780		0.00029
Excitability	ENSCAFG00000010242	SLC4A10	0.00035
Excitability	ENSCAFG00000000786	CSMD3	0.00042
Excitability	ENSCAFG00000002323	MGAT4A	0.00047
Excitability	ENSCAFG00000007379	CAMK4	0.0006
Excitability	ENSCAFG00000013228	CNKSR2	0.00074
Excitability	ENSCAFG00000001930	PGM5	0.00081
Excitability	ENSCAFG00000031499	GLIS3	0.00093
Excitability	ENSCAFG00000012890	HAT1	0.00094
Excitability	ENSCAFG00000008761	CX3CL1	0.00101
Excitability	ENSCAFG00000038846		0.00116
Excitability	ENSCAFG00000018100	SCAPER	0.0012
Excitability	ENSCAFG00000002155		0.00127
Excitability	ENSCAFG00000001314	CACNA1I	0.00133
Excitability	ENSCAFG00000018869	C5H1orf87	0.00174
Excitability	ENSCAFG00000010221	SUFU	0.00338
Excitability	ENSCAFG00000018123	ARSI	0.00363
Excitability	ENSCAFG00000015943	PRTG	0.00391
Excitability	ENSCAFG00000015648		0.00425
Excitability	ENSCAFG00000008293	FZD3	0.00524
Excitability	ENSCAFG00000003710	CRYBG1	0.00524
Excitability	ENSCAFG00000031721	CPNE1	0.00565
Excitability	ENSCAFG00000029961	APCDD1L	0.00793
Excitability	ENSCAFG00000029157	NOVA1	0.00811
Excitability	ENSCAFG00000007361	EPB41L4A	0.0086
Excitability	ENSCAFG00000040631		0.00885
Excitability	ENSCAFG00000002364	ADGRL3	0.00916
Excitability	ENSCAFG00000039209		0.01003
Excitability	ENSCAFG00000032246		0.01023
Excitability	ENSCAFG00000008058	MTMR9	0.01028
Excitability	ENSCAFG00000012179	UNC45A	0.01081
Excitability	ENSCAFG00000014454	ATM	0.01115
Excitability	ENSCAFG00000008568	AGPAT5	0.01132
Excitability	ENSCAFG00000001106	LAMA2	0.01169
Excitability	ENSCAFG00000010194	ABCC12	0.01241
Excitability	ENSCAFG00000019951	VAV3	0.01268
Excitability	ENSCAFG00000007789	ARHGAP10	0.01282
Excitability	ENSCAFG00000006555	PRKDC	0.01308
Excitability	ENSCAFG00000012413	RPS6KC1	0.0162
Excitability	ENSCAFG00000011922	KPNA1	0.01623
Excitability	ENSCAFG00000009371	SORBS3	0.01701
Excitability	ENSCAFG00000010988	CFAP410	0.01954
Excitability	ENSCAFG00000009367	HPS1	0.02013
Excitability	ENSCAFG00000020112	ABCD3	0.02145
Excitability	ENSCAFG00000032748	UBL3	0.02154
Excitability	ENSCAFG00000015932	DNAAF4	0.02275
Excitability	ENSCAFG00000011934	ARHGEF12	0.02436
Excitability	ENSCAFG00000020376	ZZZ3	0.02694
Excitability	ENSCAFG00000005140	VHL	0.0278
Excitability	ENSCAFG00000006809	NCOA4	0.0285
Excitability	ENSCAFG00000016732	SIPA1L1	0.03289
Excitability	ENSCAFG00000013823	SPECC1L	0.03439
Excitability	ENSCAFG00000036039		0.03488
Excitability	ENSCAFG00000010457	RIPOR2	0.03589
Excitability	ENSCAFG00000013506	NFE2L2	0.03625
Excitability	ENSCAFG00000031408	CFAP299	0.04039
Excitability	ENSCAFG00000000756	GRAMD4	0.0417
Excitability	ENSCAFG00000001952	2019-09-10	0.04183
Excitability	ENSCAFG00000020310	SMPD3	0.04321
Excitability	ENSCAFG00000000445	SYNE1	0.04761
Excitability	ENSCAFG00000000195	SHMT2	0.04903
Nonsocial Fear	ENSCAFG00000010026	SMARCAD1	< 0.00001
Nonsocial Fear	ENSCAFG00000005775	BIRC6	< 0.00001
Nonsocial Fear	ENSCAFG00000009227	WDR41	< 0.00001
Nonsocial Fear	ENSCAFG00000000955	TBC1D32	< 0.00001
Nonsocial Fear	ENSCAFG00000001460	PTPRD	< 0.00001
Nonsocial Fear	ENSCAFG00000033142		< 0.00001
Nonsocial Fear	ENSCAFG00000035815		< 0.00001
Nonsocial Fear	ENSCAFG00000009386	HPSE2	< 0.00001
Nonsocial Fear	ENSCAFG00000011680	ATP11B	< 0.00001
Nonsocial Fear	ENSCAFG00000034838		< 0.00001
Nonsocial Fear	ENSCAFG00000017327	BRWD3	< 0.00001
Nonsocial Fear	ENSCAFG00000006592	STK32A	< 0.00001
Nonsocial Fear	ENSCAFG00000002160	SPTLC1	< 0.00001
Nonsocial Fear	ENSCAFG00000003161	BBS9	1e-05
Nonsocial Fear	ENSCAFG00000014245	PDE1A	1e-05
Nonsocial Fear	ENSCAFG00000011936	TRPM8	1e-05
Nonsocial Fear	ENSCAFG00000017256		2e-05
Nonsocial Fear	ENSCAFG00000009764	PPHLN1	2e-05
Nonsocial Fear	ENSCAFG00000040257		3e-05
Nonsocial Fear	ENSCAFG00000006278	ATRN	4e-05
Nonsocial Fear	ENSCAFG00000004568	CUBN	4e-05
Nonsocial Fear	ENSCAFG00000018635	ROR1	6e-05
Nonsocial Fear	ENSCAFG00000012098	PGBD5	7e-05
Nonsocial Fear	ENSCAFG00000001106	LAMA2	0.00038
Nonsocial Fear	ENSCAFG00000004186		0.00039
Nonsocial Fear	ENSCAFG00000002390	FAM178B	0.00071
Nonsocial Fear	ENSCAFG00000008882	LEKR1	0.00074
Nonsocial Fear	ENSCAFG00000007420	CBFA2T2	0.0008
Nonsocial Fear	ENSCAFG00000038400		0.00095
Nonsocial Fear	ENSCAFG00000039648		0.00104
Nonsocial Fear	ENSCAFG00000023549	C9orf3	0.00131
Nonsocial Fear	ENSCAFG00000009417	CDYL	0.00133
Nonsocial Fear	ENSCAFG00000002527	LRPPRC	0.00155
Nonsocial Fear	ENSCAFG00000014030	LARS2	0.0017
Nonsocial Fear	ENSCAFG00000018100	SCAPER	0.00188
Nonsocial Fear	ENSCAFG00000004377	ACBD5	0.00284
Nonsocial Fear	ENSCAFG00000008945	SLIT1	0.00299
Nonsocial Fear	ENSCAFG00000017502	ANP32A	0.00333
Nonsocial Fear	ENSCAFG00000001697	UBR2	0.00368
Nonsocial Fear	ENSCAFG00000005720	CLPB	0.00457
Nonsocial Fear	ENSCAFG00000016982	DOCK2	0.00511
Nonsocial Fear	ENSCAFG00000017645	MYO9A	0.0052
Nonsocial Fear	ENSCAFG00000016051	CACNA1C	0.00582
Nonsocial Fear	ENSCAFG00000011430	STXBP5L	0.00728
Nonsocial Fear	ENSCAFG00000009885	JARID2	0.00936
Nonsocial Fear	ENSCAFG00000001362	PLXNA4	0.01009
Nonsocial Fear	ENSCAFG00000008630	KIFC3	0.01125
Nonsocial Fear	ENSCAFG00000017252	ATRX	0.0129
Nonsocial Fear	ENSCAFG00000009624	CWF19L1	0.01551
Nonsocial Fear	ENSCAFG00000000611	MEGF10	0.01757
Nonsocial Fear	ENSCAFG00000004432	RCBTB2	0.02036
Nonsocial Fear	ENSCAFG00000017294	P2RY10	0.0215
Nonsocial Fear	ENSCAFG00000031017	SMIM33	0.02266
Nonsocial Fear	ENSCAFG00000039348		0.02393
Nonsocial Fear	ENSCAFG00000003479		0.02646
Nonsocial Fear	ENSCAFG00000033300		0.03218
Nonsocial Fear	ENSCAFG00000001091	TGFBI	0.03699
Nonsocial Fear	ENSCAFG00000012149	ARNT	0.03708
Nonsocial Fear	ENSCAFG00000020250		0.04333
Owner Aggression	ENSCAFG00000018100	SCAPER	< 0.00001
Owner Aggression	ENSCAFG00000011983	HSPBAP1	< 0.00001
Owner Aggression	ENSCAFG00000001646	PRUNE2	< 0.00001
Owner Aggression	ENSCAFG00000015639	MNAT1	< 0.00001
Owner Aggression	ENSCAFG00000006730	TTC17	< 0.00001
Owner Aggression	ENSCAFG00000013288	ADAMTSL3	< 0.00001
Owner Aggression	ENSCAFG00000001557	CCDC171	< 0.00001
Owner Aggression	ENSCAFG00000034411		< 0.00001
Owner Aggression	ENSCAFG00000002271	PHF14	< 0.00001
Owner Aggression	ENSCAFG00000005121	SFMBT2	< 0.00001
Owner Aggression	ENSCAFG00000014257	PPP2R2C	< 0.00001
Owner Aggression	ENSCAFG00000023938	GPR158	< 0.00001
Owner Aggression	ENSCAFG00000010120	RAD54L2	< 0.00001
Owner Aggression	ENSCAFG00000016511	RFX1	< 0.00001
Owner Aggression	ENSCAFG00000003749	SLC7A11	< 0.00001
Owner Aggression	ENSCAFG00000001700	SND1	1e-05
Owner Aggression	ENSCAFG00000001630	MYH9	1e-05
Owner Aggression	ENSCAFG00000039058		1e-05
Owner Aggression	ENSCAFG00000011940	PARP9	1e-05
Owner Aggression	ENSCAFG00000004157	RAB7A	3e-05
Owner Aggression	ENSCAFG00000006989	DEFB119	3e-05
Owner Aggression	ENSCAFG00000007107	TTLL9	6e-05
Owner Aggression	ENSCAFG00000007420	CBFA2T2	9e-05
Owner Aggression	ENSCAFG00000011176	NR5A2	0.00012
Owner Aggression	ENSCAFG00000015618	TULP3	0.00028
Owner Aggression	ENSCAFG00000006462	UBXN8	0.00035
Owner Aggression	ENSCAFG00000003106	EHBP1	0.00043
Owner Aggression	ENSCAFG00000017676	SETBP1	0.00051
Owner Aggression	ENSCAFG00000000770		0.00057
Owner Aggression	ENSCAFG00000009669	MDM4	0.00059
Owner Aggression	ENSCAFG00000002714	EPHA5	0.00066
Owner Aggression	ENSCAFG00000007557	HHIP	0.0007
Owner Aggression	ENSCAFG00000004764	VWA8	0.0007
Owner Aggression	ENSCAFG00000019958	NTNG1	0.00073
Owner Aggression	ENSCAFG00000001166	KHDRBS3	0.00082
Owner Aggression	ENSCAFG00000002796	CCDC88A	0.00128
Owner Aggression	ENSCAFG00000012413	RPS6KC1	0.00161
Owner Aggression	ENSCAFG00000028804	RNF150	0.00167
Owner Aggression	ENSCAFG00000004343	EFCC1	0.002
Owner Aggression	ENSCAFG00000033917		0.00202
Owner Aggression	ENSCAFG00000031408	CFAP299	0.0033
Owner Aggression	ENSCAFG00000018777	ENOX2	0.00543
Owner Aggression	ENSCAFG00000016111	FOXK1	0.00547
Owner Aggression	ENSCAFG00000031628		0.00589
Owner Aggression	ENSCAFG00000016982	DOCK2	0.0062
Owner Aggression	ENSCAFG00000039505		0.0067
Owner Aggression	ENSCAFG00000023460	FBRSL1	0.00702
Owner Aggression	ENSCAFG00000009506	ABI3BP	0.00715
Owner Aggression	ENSCAFG00000012804	MACO1	0.00791
Owner Aggression	ENSCAFG00000000828	RPS6KA2	0.00796
Owner Aggression	ENSCAFG00000013410	RGL1	0.00833
Owner Aggression	ENSCAFG00000014718	CWF19L2	0.00951
Owner Aggression	ENSCAFG00000018136	SYT17	0.01483
Owner Aggression	ENSCAFG00000003705	CUL2	0.01765
Owner Aggression	ENSCAFG00000016200	TCF12	0.02479
Owner Aggression	ENSCAFG00000035446		0.02829
Owner Aggression	ENSCAFG00000033950		0.02862
Owner Aggression	ENSCAFG00000014599	GOLIM4	0.03051
Owner Aggression	ENSCAFG00000038128		0.031
Owner Aggression	ENSCAFG00000005433	ABCC4	0.03489
Owner Aggression	ENSCAFG00000000086	CDH20	0.03571
Owner Aggression	ENSCAFG00000037800		0.04078
Owner Aggression	ENSCAFG00000023912	LYG2	0.04435
Owner Aggression	ENSCAFG00000006492	B4GALNT4	0.0458
Owner Aggression	ENSCAFG00000000795	PDE10A	0.04811
Owner Aggression	ENSCAFG00000003570	FBXW2	0.04887
Separation Problems	ENSCAFG00000028659		< 0.00001
Separation Problems	ENSCAFG00000031499	GLIS3	< 0.00001
Separation Problems	ENSCAFG00000005746	NAV3	< 0.00001
Separation Problems	ENSCAFG00000035085		< 0.00001
Separation Problems	ENSCAFG00000011820	PRPF3	< 0.00001
Separation Problems	ENSCAFG00000017685	RIT2	< 0.00001
Separation Problems	ENSCAFG00000002096	UXS1	< 0.00001
Separation Problems	ENSCAFG00000015459		< 0.00001
Separation Problems	ENSCAFG00000000745	TBC1D22A	< 0.00001
Separation Problems	ENSCAFG00000015477		< 0.00001
Separation Problems	ENSCAFG00000036551		< 0.00001
Separation Problems	ENSCAFG00000009318	CCDC148	< 0.00001
Separation Problems	ENSCAFG00000000756	GRAMD4	< 0.00001
Separation Problems	ENSCAFG00000019132	RPH3AL	< 0.00001
Separation Problems	ENSCAFG00000002413	DST	< 0.00001
Separation Problems	ENSCAFG00000004087	MAML2	< 0.00001
Separation Problems	ENSCAFG00000013221	CTNNA3	1e-05
Separation Problems	ENSCAFG00000014975	EIF4G3	2e-05
Separation Problems	ENSCAFG00000017765	GRIA1	2e-05
Separation Problems	ENSCAFG00000010120	RAD54L2	2e-05
Separation Problems	ENSCAFG00000003570	FBXW2	3e-05
Separation Problems	ENSCAFG00000040856		3e-05
Separation Problems	ENSCAFG00000008827	ALMS1	4e-05
Separation Problems	ENSCAFG00000033314		5e-05
Separation Problems	ENSCAFG00000016354	STIM2	8e-05
Separation Problems	ENSCAFG00000004545	TRDMT1	9e-05
Separation Problems	ENSCAFG00000000334	ADAMTS2	0.00012
Separation Problems	ENSCAFG00000006762	ST18	0.00012
Separation Problems	ENSCAFG00000036684		0.00014
Separation Problems	ENSCAFG00000016568	ADAM10	0.00015
Separation Problems	ENSCAFG00000000767	CELSR1	0.00017
Separation Problems	ENSCAFG00000005270	CFAP61	0.00018
Separation Problems	ENSCAFG00000018100	SCAPER	0.00021
Separation Problems	ENSCAFG00000005720	CLPB	0.00048
Separation Problems	ENSCAFG00000020243	ZFHX3	0.00054
Separation Problems	ENSCAFG00000013410	RGL1	0.00059
Separation Problems	ENSCAFG00000002762	EML6	0.0006
Separation Problems	ENSCAFG00000010026	SMARCAD1	0.00155
Separation Problems	ENSCAFG00000000945	MAN1A1	0.00165
Separation Problems	ENSCAFG00000006103	NEK11	0.00188
Separation Problems	ENSCAFG00000009831	PRMT3	0.00217
Separation Problems	ENSCAFG00000016511	RFX1	0.00241
Separation Problems	ENSCAFG00000009799	NCAPD3	0.00287
Separation Problems	ENSCAFG00000004388		0.00302
Separation Problems	ENSCAFG00000006042	SLC23A2	0.00306
Separation Problems	ENSCAFG00000023562	DMD	0.00447
Separation Problems	ENSCAFG00000016588	C20H19orf57	0.00457
Separation Problems	ENSCAFG00000008413	EPB41L1	0.00469
Separation Problems	ENSCAFG00000015742		0.005
Separation Problems	ENSCAFG00000004092	MTMR2	0.00538
Separation Problems	ENSCAFG00000015686		0.00551
Separation Problems	ENSCAFG00000017787		0.00609
Separation Problems	ENSCAFG00000039437		0.00624
Separation Problems	ENSCAFG00000013503	DGKG	0.00638
Separation Problems	ENSCAFG00000007098	CYP7A1	0.00798
Separation Problems	ENSCAFG00000015862	FAM214A	0.00966
Separation Problems	ENSCAFG00000031536	LDLRAD4	0.00974
Separation Problems	ENSCAFG00000001161	OBSCN	0.0102
Separation Problems	ENSCAFG00000010377		0.01089
Separation Problems	ENSCAFG00000002091	RCL1	0.01155
Separation Problems	ENSCAFG00000014112	KIF15	0.01505
Separation Problems	ENSCAFG00000008340	RACGAP1	0.01538
Separation Problems	ENSCAFG00000040770		0.01554
Separation Problems	ENSCAFG00000012545	CARF	0.01637
Separation Problems	ENSCAFG00000013052	TANC2	0.01691
Separation Problems	ENSCAFG00000031802	ISPD	0.01759
Separation Problems	ENSCAFG00000016310	IKZF3	0.01778
Separation Problems	ENSCAFG00000008846	FBXO41	0.01929
Separation Problems	ENSCAFG00000006520	KCNG3	0.01959
Separation Problems	ENSCAFG00000008285	HNF4G	0.01972
Separation Problems	ENSCAFG00000006812	TMEM132D	0.02037
Separation Problems	ENSCAFG00000016449		0.02209
Separation Problems	ENSCAFG00000004057	SRPK2	0.02229
Separation Problems	ENSCAFG00000011585	PCNX2	0.02251
Separation Problems	ENSCAFG00000006668	KBTBD8	0.02547
Separation Problems	ENSCAFG00000032790		0.02612
Separation Problems	ENSCAFG00000006743	PCMTD1	0.02651
Separation Problems	ENSCAFG00000002467	SNX13	0.03089
Separation Problems	ENSCAFG00000020112	ABCD3	0.0313
Separation Problems	ENSCAFG00000010881	IGF1R	0.03273
Separation Problems	ENSCAFG00000028595		0.03568
Separation Problems	ENSCAFG00000013863	CEMIP	0.03909
Separation Problems	ENSCAFG00000018323	ABLIM3	0.03934
Separation Problems	ENSCAFG00000002257	ICA1	0.04353
Separation Problems	ENSCAFG00000013375	EFCAB3	0.04558
Separation Problems	ENSCAFG00000007568	CPA6	0.04727
Stranger Aggression	ENSCAFG00000000079	RELCH	< 0.00001
Stranger Aggression	ENSCAFG00000003678	CCNY	< 0.00001
Stranger Aggression	ENSCAFG00000004408	CAB39L	< 0.00001
Stranger Aggression	ENSCAFG00000004341	SETDB2	< 0.00001
Stranger Aggression	ENSCAFG00000009971	ARMH3	< 0.00001
Stranger Aggression	ENSCAFG00000004325	KPNA3	< 0.00001
Stranger Aggression	ENSCAFG00000031429	GNA14	< 0.00001
Stranger Aggression	ENSCAFG00000004379	FNDC3A	< 0.00001
Stranger Aggression	ENSCAFG00000003737	PARD3	< 0.00001
Stranger Aggression	ENSCAFG00000004478	LRCH1	< 0.00001
Stranger Aggression	ENSCAFG00000002257	ICA1	< 0.00001
Stranger Aggression	ENSCAFG00000004436	RB1	< 0.00001
Stranger Aggression	ENSCAFG00000005667	NEK10	< 0.00001
Stranger Aggression	ENSCAFG00000001560	KIF6	< 0.00001
Stranger Aggression	ENSCAFG00000013410	RGL1	< 0.00001
Stranger Aggression	ENSCAFG00000014030	LARS2	< 0.00001
Stranger Aggression	ENSCAFG00000000353	STXBP5	< 0.00001
Stranger Aggression	ENSCAFG00000003705	CUL2	< 0.00001
Stranger Aggression	ENSCAFG00000005954	SUMF1	< 0.00001
Stranger Aggression	ENSCAFG00000035101		< 0.00001
Stranger Aggression	ENSCAFG00000005707	OSBPL8	< 0.00001
Stranger Aggression	ENSCAFG00000001557	CCDC171	< 0.00001
Stranger Aggression	ENSCAFG00000005040	KLF12	< 0.00001
Stranger Aggression	ENSCAFG00000002364	ADGRL3	1e-05
Stranger Aggression	ENSCAFG00000000637	SLC12A2	1e-05
Stranger Aggression	ENSCAFG00000004345	RCBTB1	2e-05
Stranger Aggression	ENSCAFG00000011415	MCUB	2e-05
Stranger Aggression	ENSCAFG00000006103	NEK11	0.00021
Stranger Aggression	ENSCAFG00000005326	UVRAG	0.00027
Stranger Aggression	ENSCAFG00000020058	SNX7	0.00037
Stranger Aggression	ENSCAFG00000005175	SCEL	0.00081
Stranger Aggression	ENSCAFG00000024856	KPNA4	0.00118
Stranger Aggression	ENSCAFG00000000677	LRP12	0.0013
Stranger Aggression	ENSCAFG00000018920	CLEC16A	0.00157
Stranger Aggression	ENSCAFG00000009506	ABI3BP	0.00163
Stranger Aggression	ENSCAFG00000007235	HIPK3	0.00194
Stranger Aggression	ENSCAFG00000017685	RIT2	0.00204
Stranger Aggression	ENSCAFG00000013966	CPS1	0.00206
Stranger Aggression	ENSCAFG00000010984	VTI1A	0.00216
Stranger Aggression	ENSCAFG00000001286	FANCC	0.00303
Stranger Aggression	ENSCAFG00000004337	EBPL	0.00342
Stranger Aggression	ENSCAFG00000001738	GRM8	0.00355
Stranger Aggression	ENSCAFG00000004764	VWA8	0.00476
Stranger Aggression	ENSCAFG00000038544		0.00496
Stranger Aggression	ENSCAFG00000005838	PCCA	0.0072
Stranger Aggression	ENSCAFG00000003860	MFSD8	0.00724
Stranger Aggression	ENSCAFG00000002271	PHF14	0.01045
Stranger Aggression	ENSCAFG00000010942	CCDC91	0.0112
Stranger Aggression	ENSCAFG00000006431	LARS	0.01191
Stranger Aggression	ENSCAFG00000040913		0.01192
Stranger Aggression	ENSCAFG00000000507	VPS13B	0.01201
Stranger Aggression	ENSCAFG00000039466		0.01361
Stranger Aggression	ENSCAFG00000037402		0.01439
Stranger Aggression	ENSCAFG00000024350	CENPP	0.01692
Stranger Aggression	ENSCAFG00000005746	NAV3	0.02133
Stranger Aggression	ENSCAFG00000001635	MLLT3	0.02134
Stranger Aggression	ENSCAFG00000030242	HS3ST2	0.03211
Stranger Aggression	ENSCAFG00000035258		0.04196
Stranger Fear	ENSCAFG00000003929	COG5	< 0.00001
Stranger Fear	ENSCAFG00000011082	CAMSAP2	< 0.00001
Stranger Fear	ENSCAFG00000001434	KDM4C	< 0.00001
Stranger Fear	ENSCAFG00000018024	TRAPPC8	< 0.00001
Stranger Fear	ENSCAFG00000002257	ICA1	< 0.00001
Stranger Fear	ENSCAFG00000031429	GNA14	< 0.00001
Stranger Fear	ENSCAFG00000000693	ANGPT1	< 0.00001
Stranger Fear	ENSCAFG00000034027		1e-05
Stranger Fear	ENSCAFG00000013221	CTNNA3	1e-05
Stranger Fear	ENSCAFG00000006462	UBXN8	1e-05
Stranger Fear	ENSCAFG00000014030	LARS2	1e-05
Stranger Fear	ENSCAFG00000015131	CEP126	3e-05
Stranger Fear	ENSCAFG00000013671	EFL1	3e-05
Stranger Fear	ENSCAFG00000004568	CUBN	7e-05
Stranger Fear	ENSCAFG00000015679	RGS7	0.00012
Stranger Fear	ENSCAFG00000003153	VPS54	0.00027
Stranger Fear	ENSCAFG00000023938	GPR158	0.00029
Stranger Fear	ENSCAFG00000010811	LRRC28	0.00031
Stranger Fear	ENSCAFG00000017227	GABRG2	0.00051
Stranger Fear	ENSCAFG00000000337	PPM1H	0.00064
Stranger Fear	ENSCAFG00000009159	TRIO	0.00068
Stranger Fear	ENSCAFG00000002546	CAMKMT	0.00072
Stranger Fear	ENSCAFG00000009280	PTPRT	0.00079
Stranger Fear	ENSCAFG00000015967	MTHFD1	0.00116
Stranger Fear	ENSCAFG00000019296	METTL16	0.00143
Stranger Fear	ENSCAFG00000006103	NEK11	0.00163
Stranger Fear	ENSCAFG00000035420		0.00166
Stranger Fear	ENSCAFG00000009893	DTNBP1	0.0025
Stranger Fear	ENSCAFG00000010766	TESMIN	0.00295
Stranger Fear	ENSCAFG00000032631		0.0032
Stranger Fear	ENSCAFG00000035085		0.00532
Stranger Fear	ENSCAFG00000002552	INVS	0.00724
Stranger Fear	ENSCAFG00000003995	FYN	0.00727
Stranger Fear	ENSCAFG00000016732	SIPA1L1	0.00989
Stranger Fear	ENSCAFG00000008738	TM9SF3	0.01119
Stranger Fear	ENSCAFG00000000974	DERL1	0.02366
Stranger Fear	ENSCAFG00000017314	MBTD1	0.02656
Stranger Fear	ENSCAFG00000003582	VPS41	0.02675
Stranger Fear	ENSCAFG00000018267	TOP3A	0.02676
Stranger Fear	ENSCAFG00000005720	CLPB	0.03352
Stranger Fear	ENSCAFG00000004408	CAB39L	0.04276
Stranger Fear	ENSCAFG00000019735	PIK3CD	0.04406
Stranger Fear	ENSCAFG00000035409		0.0448
Stranger Fear	ENSCAFG00000004855	EPB41L5	0.04492
Stranger Fear	ENSCAFG00000020154	EVI5	0.04926
Touch Sensitivity	ENSCAFG00000006013	CNTN4	< 0.00001
Touch Sensitivity	ENSCAFG00000002796	CCDC88A	< 0.00001
Touch Sensitivity	ENSCAFG00000017362	NUP210L	< 0.00001
Touch Sensitivity	ENSCAFG00000015625	FMN2	< 0.00001
Touch Sensitivity	ENSCAFG00000028659		< 0.00001
Touch Sensitivity	ENSCAFG00000000696	RSPO2	< 0.00001
Touch Sensitivity	ENSCAFG00000002762	EML6	< 0.00001
Touch Sensitivity	ENSCAFG00000005720	CLPB	< 0.00001
Touch Sensitivity	ENSCAFG00000017248	UBAP2L	< 0.00001
Touch Sensitivity	ENSCAFG00000025531		< 0.00001
Touch Sensitivity	ENSCAFG00000036746		< 0.00001
Touch Sensitivity	ENSCAFG00000010355	ICE1	1e-05
Touch Sensitivity	ENSCAFG00000017645	MYO9A	1e-05
Touch Sensitivity	ENSCAFG00000005916	ANKRD28	1e-05
Touch Sensitivity	ENSCAFG00000005998	LHFPL6	2e-05
Touch Sensitivity	ENSCAFG00000002661	SMC2	3e-05
Touch Sensitivity	ENSCAFG00000023460	FBRSL1	3e-05
Touch Sensitivity	ENSCAFG00000008185	ARFIP1	4e-05
Touch Sensitivity	ENSCAFG00000000737	CDC42SE2	4e-05
Touch Sensitivity	ENSCAFG00000011585	PCNX2	4e-05
Touch Sensitivity	ENSCAFG00000035409		4e-05
Touch Sensitivity	ENSCAFG00000005775	BIRC6	0.0001
Touch Sensitivity	ENSCAFG00000000884	WDR27	0.00017
Touch Sensitivity	ENSCAFG00000018665	POLDIP2	0.00027
Touch Sensitivity	ENSCAFG00000018663	TNFAIP1	0.0003
Touch Sensitivity	ENSCAFG00000017651	DNM2	0.00031
Touch Sensitivity	ENSCAFG00000007822	BDP1	0.00032
Touch Sensitivity	ENSCAFG00000017598	SHISA6	0.00042
Touch Sensitivity	ENSCAFG00000032632	WNT7A	0.00048
Touch Sensitivity	ENSCAFG00000017606	UNC79	0.00049
Touch Sensitivity	ENSCAFG00000006520	KCNG3	0.00049
Touch Sensitivity	ENSCAFG00000001173	FAM135B	0.00056
Touch Sensitivity	ENSCAFG00000033474		0.0006
Touch Sensitivity	ENSCAFG00000018564	GRIA3	0.00071
Touch Sensitivity	ENSCAFG00000000569	ZNF608	0.00076
Touch Sensitivity	ENSCAFG00000038398		0.00079
Touch Sensitivity	ENSCAFG00000010682	SP110	0.00116
Touch Sensitivity	ENSCAFG00000005600	TASP1	0.0012
Touch Sensitivity	ENSCAFG00000020112	ABCD3	0.00143
Touch Sensitivity	ENSCAFG00000003479		0.00163
Touch Sensitivity	ENSCAFG00000035085		0.0019
Touch Sensitivity	ENSCAFG00000012564	PIK3C2G	0.00244
Touch Sensitivity	ENSCAFG00000018591	ARHGAP28	0.00399
Touch Sensitivity	ENSCAFG00000002753	GPNMB	0.00434
Touch Sensitivity	ENSCAFG00000034887		0.00449
Touch Sensitivity	ENSCAFG00000005403	LRP1B	0.00476
Touch Sensitivity	ENSCAFG00000008319	CHODL	0.00542
Touch Sensitivity	ENSCAFG00000018890	TXNDC11	0.00597
Touch Sensitivity	ENSCAFG00000007149	FBLN7	0.0066
Touch Sensitivity	ENSCAFG00000031628		0.00691
Touch Sensitivity	ENSCAFG00000000828	RPS6KA2	0.00702
Touch Sensitivity	ENSCAFG00000016310	IKZF3	0.00771
Touch Sensitivity	ENSCAFG00000010897	ARHGEF38	0.00779
Touch Sensitivity	ENSCAFG00000024183		0.01036
Touch Sensitivity	ENSCAFG00000036101		0.01153
Touch Sensitivity	ENSCAFG00000006050	MYO16	0.01334
Touch Sensitivity	ENSCAFG00000010229	DOCK3	0.0151
Touch Sensitivity	ENSCAFG00000010484	PKP2	0.01543
Touch Sensitivity	ENSCAFG00000004130	NEBL	0.01612
Touch Sensitivity	ENSCAFG00000017197	ATP8B2	0.01619
Touch Sensitivity	ENSCAFG00000000719	NUDCD1	0.01641
Touch Sensitivity	ENSCAFG00000015162	KTN1	0.0177
Touch Sensitivity	ENSCAFG00000010476	NOTCH2	0.01791
Touch Sensitivity	ENSCAFG00000030884	APOPT1	0.01819
Touch Sensitivity	ENSCAFG00000000068	BCL2	0.01831
Touch Sensitivity	ENSCAFG00000001700	SND1	0.01904
Touch Sensitivity	ENSCAFG00000005904	FEZ2	0.01921
Touch Sensitivity	ENSCAFG00000030928		0.01949
Touch Sensitivity	ENSCAFG00000004454	SUCLA2	0.02121
Touch Sensitivity	ENSCAFG00000004249	ARHGAP21	0.02171
Touch Sensitivity	ENSCAFG00000008744	RASGRF2	0.02172
Touch Sensitivity	ENSCAFG00000018100	SCAPER	0.02322
Touch Sensitivity	ENSCAFG00000009227	WDR41	0.02445
Touch Sensitivity	ENSCAFG00000009218	MORN4	0.02484
Touch Sensitivity	ENSCAFG00000000226	HBS1L	0.02568
Touch Sensitivity	ENSCAFG00000002527	LRPPRC	0.0279
Touch Sensitivity	ENSCAFG00000009033	DYSF	0.03512
Touch Sensitivity	ENSCAFG00000009322	DNAJC17	0.03748
Touch Sensitivity	ENSCAFG00000009021	SEC31A	0.03798
Touch Sensitivity	ENSCAFG00000003471	PNISR	0.03828
Touch Sensitivity	ENSCAFG00000009831	PRMT3	0.04837
Touch Sensitivity	ENSCAFG00000014257	PPP2R2C	0.04866
Trainability	ENSCAFG00000018564	GRIA3	< 0.00001
Trainability	ENSCAFG00000014257	PPP2R2C	< 0.00001
Trainability	ENSCAFG00000007420	CBFA2T2	< 0.00001
Trainability	ENSCAFG00000000011	NFATC1	< 0.00001
Trainability	ENSCAFG00000029157	NOVA1	< 0.00001
Trainability	ENSCAFG00000004545	TRDMT1	< 0.00001
Trainability	ENSCAFG00000018849	SNX29	< 0.00001
Trainability	ENSCAFG00000037352		< 0.00001
Trainability	ENSCAFG00000003373	DGKI	< 0.00001
Trainability	ENSCAFG00000000133	WDR7	< 0.00001
Trainability	ENSCAFG00000009912	ERG	< 0.00001
Trainability	ENSCAFG00000000522	SNCAIP	< 0.00001
Trainability	ENSCAFG00000000353	STXBP5	< 0.00001
Trainability	ENSCAFG00000001700	SND1	< 0.00001
Trainability	ENSCAFG00000039561		< 0.00001
Trainability	ENSCAFG00000008211	CACNA2D3	< 0.00001
Trainability	ENSCAFG00000028708	SCD5	< 0.00001
Trainability	ENSCAFG00000018972	EFCAB5	1e-05
Trainability	ENSCAFG00000015351	BAIAP2L1	1e-05
Trainability	ENSCAFG00000032743		1e-05
Trainability	ENSCAFG00000013852	MATN2	1e-05
Trainability	ENSCAFG00000010692	USF3	1e-05
Trainability	ENSCAFG00000034669		2e-05
Trainability	ENSCAFG00000009081	EPHA6	2e-05
Trainability	ENSCAFG00000035434		5e-05
Trainability	ENSCAFG00000004157	RAB7A	5e-05
Trainability	ENSCAFG00000005949	HACL1	6e-05
Trainability	ENSCAFG00000000745	TBC1D22A	7e-05
Trainability	ENSCAFG00000008333	TMEM161B	8e-05
Trainability	ENSCAFG00000005326	UVRAG	0.00015
Trainability	ENSCAFG00000005849	TBC1D5	0.00017
Trainability	ENSCAFG00000009052	LIN54	0.00032
Trainability	ENSCAFG00000025531		0.00039
Trainability	ENSCAFG00000000012	ATP9B	0.00046
Trainability	ENSCAFG00000011266	TDRD1	0.00055
Trainability	ENSCAFG00000011725	ATRNL1	0.00061
Trainability	ENSCAFG00000003651	CSMD2	0.0008
Trainability	ENSCAFG00000000582	GRAMD2B	0.0013
Trainability	ENSCAFG00000014755	SAMD7	0.00141
Trainability	ENSCAFG00000008199	FMN1	0.00146
Trainability	ENSCAFG00000009595	PKD2	0.00162
Trainability	ENSCAFG00000030938		0.00196
Trainability	ENSCAFG00000006989	DEFB119	0.00231
Trainability	ENSCAFG00000032255	RNF175	0.00295
Trainability	ENSCAFG00000001425	GKAP1	0.00315
Trainability	ENSCAFG00000007557	HHIP	0.00319
Trainability	ENSCAFG00000016024	FBXL18	0.00324
Trainability	ENSCAFG00000012544	COPA	0.00386
Trainability	ENSCAFG00000015742		0.00397
Trainability	ENSCAFG00000002025	GCC2	0.00431
Trainability	ENSCAFG00000010235	ARHGAP32	0.00436
Trainability	ENSCAFG00000006266	ARHGAP26	0.00437
Trainability	ENSCAFG00000013288	ADAMTSL3	0.00443
Trainability	ENSCAFG00000002023	RCAN2	0.0048
Trainability	ENSCAFG00000017514	PCDH19	0.00567
Trainability	ENSCAFG00000014358	CASK	0.00583
Trainability	ENSCAFG00000030561		0.00664
Trainability	ENSCAFG00000014045	LRRC20	0.00789
Trainability	ENSCAFG00000025514	C28H10orf53	0.00839
Trainability	ENSCAFG00000018024	TRAPPC8	0.00855
Trainability	ENSCAFG00000000637	SLC12A2	0.00941
Trainability	ENSCAFG00000008851	HECTD4	0.01054
Trainability	ENSCAFG00000019030	ABAT	0.01085
Trainability	ENSCAFG00000010827	TTC23	0.01173
Trainability	ENSCAFG00000000507	VPS13B	0.0125
Trainability	ENSCAFG00000018267	TOP3A	0.01292
Trainability	ENSCAFG00000014001	TOGARAM1	0.01334
Trainability	ENSCAFG00000011571	SOX5	0.01347
Trainability	ENSCAFG00000007837	KNTC1	0.01539
Trainability	ENSCAFG00000005056	SCN10A	0.01553
Trainability	ENSCAFG00000002414	AGMO	0.0158
Trainability	ENSCAFG00000005839	SATB1	0.01582
Trainability	ENSCAFG00000011796	MCF2L2	0.01586
Trainability	ENSCAFG00000011940	PARP9	0.01591
Trainability	ENSCAFG00000010996	CCDC15	0.01715
Trainability	ENSCAFG00000005180	MRPL33	0.01773
Trainability	ENSCAFG00000023072	POC1A	0.02154
Trainability	ENSCAFG00000010120	RAD54L2	0.02275
Trainability	ENSCAFG00000036166		0.02371
Trainability	ENSCAFG00000025069	GABRA2	0.02435
Trainability	ENSCAFG00000023015	SERPINB12	0.02527
Trainability	ENSCAFG00000010457	RIPOR2	0.02644
Trainability	ENSCAFG00000014108	OSBPL1A	0.0265
Trainability	ENSCAFG00000016511	RFX1	0.02901
Trainability	ENSCAFG00000015716	RAC1	0.02917
Trainability	ENSCAFG00000000867	RAD50	0.02983
Trainability	ENSCAFG00000035103		0.02999
Trainability	ENSCAFG00000010879	IGSF11	0.03246
Trainability	ENSCAFG00000033950		0.03426
Trainability	ENSCAFG00000039224		0.0348
Trainability	ENSCAFG00000004475	IWS1	0.03531
Trainability	ENSCAFG00000003422	GRB10	0.03998
Trainability	ENSCAFG00000002255	ICK	0.04328
Trainability	ENSCAFG00000006462	UBXN8	0.04686
Trainability	ENSCAFG00000013170	VPS8	0.04833
Trainability	ENSCAFG00000009146	RBM19	0.04899

## Sheet: Table S8
Table S8. Significant Gene Ontology (GO) terms from enrichment analyses mapping SNPs to the nearest gene within 20kb to derive gene-level p values (meta-analysis, Fisher’s method).
Behavioral Trait	GO ID	Term	p value
Attach & Atn Seeking	GO:0048172	regulation of short-term neuronal synapt...	0.00035
Attach & Atn Seeking	GO:0043067	regulation of programmed cell death	0.00114
Attach & Atn Seeking	GO:0060047	heart contraction	0.00183
Attach & Atn Seeking	GO:0086001	cardiac muscle cell action potential	0.00332
Attach & Atn Seeking	GO:0007178	transmembrane receptor protein serine/th...	0.00336
Attach & Atn Seeking	GO:0055117	regulation of cardiac muscle contraction	0.00401
Attach & Atn Seeking	GO:0008608	attachment of spindle microtubules to ki...	0.00484
Attach & Atn Seeking	GO:0001845	phagolysosome assembly	0.00514
Attach & Atn Seeking	GO:0021984	adenohypophysis development	0.00514
Attach & Atn Seeking	GO:0048791	calcium ion-regulated exocytosis of neur...	0.00514
Attach & Atn Seeking	GO:0090307	mitotic spindle assembly	0.00668
Attach & Atn Seeking	GO:0006914	autophagy	0.0081
Attach & Atn Seeking	GO:0035994	response to muscle stretch	0.00847
Attach & Atn Seeking	GO:0046621	negative regulation of organ growth	0.00847
Attach & Atn Seeking	GO:0014706	striated muscle tissue development	0.01037
Attach & Atn Seeking	GO:0033173	calcineurin-NFAT signaling cascade	0.01054
Attach & Atn Seeking	GO:0048678	response to axon injury	0.01054
Attach & Atn Seeking	GO:0071322	cellular response to carbohydrate stimul...	0.01059
Attach & Atn Seeking	GO:0032088	negative regulation of NF-kappaB transcr...	0.01176
Attach & Atn Seeking	GO:0042692	muscle cell differentiation	0.01504
Attach & Atn Seeking	GO:0032367	intracellular cholesterol transport	0.01822
Attach & Atn Seeking	GO:0015872	dopamine transport	0.02116
Attach & Atn Seeking	GO:0010955	negative regulation of protein processin...	0.02133
Attach & Atn Seeking	GO:0071634	regulation of transforming growth factor...	0.02133
Attach & Atn Seeking	GO:0006418	tRNA aminoacylation for protein translat...	0.02411
Attach & Atn Seeking	GO:0019228	neuronal action potential	0.02471
Attach & Atn Seeking	GO:0031349	positive regulation of defense response	0.0279
Attach & Atn Seeking	GO:0042147	retrograde transport, endosome to Golgi	0.02808
Attach & Atn Seeking	GO:0007422	peripheral nervous system development	0.0281
Attach & Atn Seeking	GO:0090502	RNA phosphodiester bond hydrolysis, endo...	0.03209
Attach & Atn Seeking	GO:0008272	sulfate transport	0.03368
Attach & Atn Seeking	GO:0006639	acylglycerol metabolic process	0.03376
Attach & Atn Seeking	GO:0009126	purine nucleoside monophosphate metaboli...	0.03418
Attach & Atn Seeking	GO:0008219	cell death	0.03459
Attach & Atn Seeking	GO:0006623	protein targeting to vacuole	0.03465
Attach & Atn Seeking	GO:0048488	synaptic vesicle endocytosis	0.03647
Attach & Atn Seeking	GO:2000300	regulation of synaptic vesicle exocytosi...	0.03647
Attach & Atn Seeking	GO:0043547	positive regulation of GTPase activity	0.03941
Attach & Atn Seeking	GO:0031032	actomyosin structure organization	0.04052
Attach & Atn Seeking	GO:1905039	carboxylic acid transmembrane transport	0.0406
Attach & Atn Seeking	GO:0034198	cellular response to amino acid starvati...	0.04093
Attach & Atn Seeking	GO:0007420	brain development	0.04245
Attach & Atn Seeking	GO:0051279	regulation of release of sequestered cal...	0.04247
Attach & Atn Seeking	GO:0072329	monocarboxylic acid catabolic process	0.04249
Attach & Atn Seeking	GO:0010447	response to acidic pH	0.04271
Attach & Atn Seeking	GO:0030497	fatty acid elongation	0.04271
Attach & Atn Seeking	GO:0032438	melanosome organization	0.04271
Attach & Atn Seeking	GO:1903363	negative regulation of cellular protein ...	0.04277
Attach & Atn Seeking	GO:0000422	autophagy of mitochondrion	0.04488
Attach & Atn Seeking	GO:0032024	positive regulation of insulin secretion	0.04564
Attach & Atn Seeking	GO:0032467	positive regulation of cytokinesis	0.04564
Attach & Atn Seeking	GO:0090630	activation of GTPase activity	0.04826
Attach & Atn Seeking	GO:1905515	non-motile cilium assembly	0.04846
Attach & Atn Seeking	GO:0060548	negative regulation of cell death	0.04976
Chasing	GO:0050919	negative chemotaxis	6e-05
Chasing	GO:0071526	semaphorin-plexin signaling pathway	0.00016
Chasing	GO:0048843	negative regulation of axon extension in...	0.00039
Chasing	GO:0035335	peptidyl-tyrosine dephosphorylation	0.00121
Chasing	GO:0060047	heart contraction	0.0017
Chasing	GO:0006886	intracellular protein transport	0.00199
Chasing	GO:0001755	neural crest cell migration	0.00207
Chasing	GO:0035269	protein O-linked mannosylation	0.00479
Chasing	GO:0010646	regulation of cell communication	0.00559
Chasing	GO:1902932	positive regulation of alcohol biosynthe...	0.00623
Chasing	GO:0051056	regulation of small GTPase mediated sign...	0.00787
Chasing	GO:0006887	exocytosis	0.00968
Chasing	GO:0009593	detection of chemical stimulus	0.01039
Chasing	GO:0048813	dendrite morphogenesis	0.01423
Chasing	GO:0031648	protein destabilization	0.01429
Chasing	GO:1903146	regulation of autophagy of mitochondrion	0.01479
Chasing	GO:0043547	positive regulation of GTPase activity	0.01549
Chasing	GO:0060602	branch elongation of an epithelium	0.01705
Chasing	GO:0002026	regulation of the force of heart contrac...	0.01997
Chasing	GO:0046885	regulation of hormone biosynthetic proce...	0.01997
Chasing	GO:0048041	focal adhesion assembly	0.02035
Chasing	GO:0008406	gonad development	0.0204
Chasing	GO:0007411	axon guidance	0.0205
Chasing	GO:0048522	positive regulation of cellular process	0.02066
Chasing	GO:0042147	retrograde transport, endosome to Golgi	0.02556
Chasing	GO:0008219	cell death	0.02658
Chasing	GO:0030902	hindbrain development	0.02985
Chasing	GO:0045739	positive regulation of DNA repair	0.03021
Chasing	GO:2001240	negative regulation of extrinsic apoptot...	0.03028
Chasing	GO:1901184	regulation of ERBB signaling pathway	0.03284
Chasing	GO:1903169	regulation of calcium ion transmembrane ...	0.03316
Chasing	GO:0031076	embryonic camera-type eye development	0.03327
Chasing	GO:0021680	cerebellar Purkinje cell layer developme...	0.03843
Chasing	GO:0050730	regulation of peptidyl-tyrosine phosphor...	0.03999
Chasing	GO:0040036	regulation of fibroblast growth factor r...	0.04067
Chasing	GO:1903672	positive regulation of sprouting angioge...	0.04068
Chasing	GO:0010893	positive regulation of steroid biosynthe...	0.0408
Chasing	GO:0043032	positive regulation of macrophage activa...	0.0408
Chasing	GO:0043584	nose development	0.0408
Chasing	GO:0048311	mitochondrion distribution	0.0408
Chasing	GO:0099560	synaptic membrane adhesion	0.0408
Chasing	GO:1905606	regulation of presynapse assembly	0.0408
Chasing	GO:0055074	calcium ion homeostasis	0.04138
Chasing	GO:0007600	sensory perception	0.04144
Chasing	GO:0001676	long-chain fatty acid metabolic process	0.04155
Chasing	GO:0032467	positive regulation of cytokinesis	0.04288
Chasing	GO:0048663	neuron fate commitment	0.04748
Chasing	GO:0030433	ubiquitin-dependent ERAD pathway	0.04838
Chasing	GO:0010458	exit from mitosis	0.04881
Chasing	GO:0010460	positive regulation of heart rate	0.04881
Chasing	GO:0032352	positive regulation of hormone metabolic...	0.04881
Chasing	GO:0035336	long-chain fatty-acyl-CoA metabolic proc...	0.04881
Chasing	GO:0043923	positive regulation by host of viral tra...	0.04881
Chasing	GO:0045822	negative regulation of heart contraction	0.04881
Chasing	GO:0048486	parasympathetic nervous system developme...	0.04881
Chasing	GO:0051151	negative regulation of smooth muscle cel...	0.04881
Chasing	GO:0070633	transepithelial transport	0.04881
Chasing	GO:0071786	endoplasmic reticulum tubular network or...	0.04881
Chasing	GO:1901223	negative regulation of NIK/NF-kappaB sig...	0.04881
Chasing	GO:0016311	dephosphorylation	0.04928
Chasing	GO:0044257	cellular protein catabolic process	0.04938
Chasing	GO:0032956	regulation of actin cytoskeleton organiz...	0.04949
Dog Aggression	GO:1904031	positive regulation of cyclin-dependent ...	0.00042
Dog Aggression	GO:0051383	kinetochore organization	0.00059
Dog Aggression	GO:0044260	cellular macromolecule metabolic process	0.00087
Dog Aggression	GO:1903902	positive regulation of viral life cycle	0.0016
Dog Aggression	GO:0001541	ovarian follicle development	0.00176
Dog Aggression	GO:0060412	ventricular septum morphogenesis	0.00176
Dog Aggression	GO:0045787	positive regulation of cell cycle	0.00258
Dog Aggression	GO:0090049	regulation of cell migration involved in...	0.00443
Dog Aggression	GO:0051497	negative regulation of stress fiber asse...	0.00445
Dog Aggression	GO:0043393	regulation of protein binding	0.0048
Dog Aggression	GO:0007030	Golgi organization	0.0054
Dog Aggression	GO:0046596	regulation of viral entry into host cell	0.0058
Dog Aggression	GO:2001259	positive regulation of cation channel ac...	0.00665
Dog Aggression	GO:0003157	endocardium development	0.00736
Dog Aggression	GO:0060628	regulation of ER to Golgi vesicle-mediat...	0.00736
Dog Aggression	GO:1902117	positive regulation of organelle assembl...	0.00753
Dog Aggression	GO:0006890	retrograde vesicle-mediated transport, G...	0.00772
Dog Aggression	GO:0051057	positive regulation of small GTPase medi...	0.00956
Dog Aggression	GO:0032774	RNA biosynthetic process	0.00972
Dog Aggression	GO:0030324	lung development	0.01082
Dog Aggression	GO:0007093	mitotic cell cycle checkpoint	0.01343
Dog Aggression	GO:0045746	negative regulation of Notch signaling p...	0.01343
Dog Aggression	GO:0048169	regulation of long-term neuronal synapti...	0.01343
Dog Aggression	GO:1901381	positive regulation of potassium ion tra...	0.01343
Dog Aggression	GO:1903671	negative regulation of sprouting angioge...	0.01343
Dog Aggression	GO:0010799	regulation of peptidyl-threonine phospho...	0.01409
Dog Aggression	GO:0034333	adherens junction assembly	0.01416
Dog Aggression	GO:0015012	heparan sulfate proteoglycan biosyntheti...	0.01592
Dog Aggression	GO:0045687	positive regulation of glial cell differ...	0.01592
Dog Aggression	GO:0043406	positive regulation of MAP kinase activi...	0.01623
Dog Aggression	GO:0050680	negative regulation of epithelial cell p...	0.01672
Dog Aggression	GO:0000186	activation of MAPKK activity	0.01841
Dog Aggression	GO:0022607	cellular component assembly	0.01906
Dog Aggression	GO:1902186	regulation of viral release from host ce...	0.01929
Dog Aggression	GO:0035307	positive regulation of protein dephospho...	0.02165
Dog Aggression	GO:0035909	aorta morphogenesis	0.02165
Dog Aggression	GO:0045724	positive regulation of cilium assembly	0.02165
Dog Aggression	GO:0034067	protein localization to Golgi apparatus	0.02487
Dog Aggression	GO:0043537	negative regulation of blood vessel endo...	0.02487
Dog Aggression	GO:0007052	mitotic spindle organization	0.02492
Dog Aggression	GO:0060415	muscle tissue morphogenesis	0.02495
Dog Aggression	GO:0045747	positive regulation of Notch signaling p...	0.02835
Dog Aggression	GO:0021987	cerebral cortex development	0.02992
Dog Aggression	GO:0071902	positive regulation of protein serine/th...	0.03114
Dog Aggression	GO:0043039	tRNA aminoacylation	0.03189
Dog Aggression	GO:0008089	anterograde axonal transport	0.03206
Dog Aggression	GO:0090503	RNA phosphodiester bond hydrolysis, exon...	0.03206
Dog Aggression	GO:0002263	cell activation involved in immune respo...	0.03234
Dog Aggression	GO:0000226	microtubule cytoskeleton organization	0.03401
Dog Aggression	GO:0016567	protein ubiquitination	0.03511
Dog Aggression	GO:0031032	actomyosin structure organization	0.03533
Dog Aggression	GO:0055010	ventricular cardiac muscle tissue morpho...	0.03586
Dog Aggression	GO:0051642	centrosome localization	0.03602
Dog Aggression	GO:0070588	calcium ion transmembrane transport	0.03793
Dog Aggression	GO:0035051	cardiocyte differentiation	0.03859
Dog Aggression	GO:0002043	blood vessel endothelial cell proliferat...	0.03893
Dog Aggression	GO:0006656	phosphatidylcholine biosynthetic process	0.03893
Dog Aggression	GO:0006684	sphingomyelin metabolic process	0.03893
Dog Aggression	GO:0006901	vesicle coating	0.03893
Dog Aggression	GO:0007175	negative regulation of epidermal growth ...	0.03893
Dog Aggression	GO:0007625	grooming behavior	0.03893
Dog Aggression	GO:0010832	negative regulation of myotube different...	0.03893
Dog Aggression	GO:0018279	protein N-linked glycosylation via aspar...	0.03893
Dog Aggression	GO:0035278	miRNA mediated inhibition of translation	0.03893
Dog Aggression	GO:0045651	positive regulation of macrophage differ...	0.03893
Dog Aggression	GO:0047497	mitochondrion transport along microtubul...	0.03893
Dog Aggression	GO:0060211	regulation of nuclear-transcribed mRNA p...	0.03893
Dog Aggression	GO:0070863	positive regulation of protein exit from...	0.03893
Dog Aggression	GO:0072378	blood coagulation, fibrin clot formation	0.03893
Dog Aggression	GO:0098719	sodium ion import across plasma membrane	0.03893
Dog Aggression	GO:0106074	aminoacyl-tRNA metabolism involved in tr...	0.03893
Dog Aggression	GO:1900153	positive regulation of nuclear-transcrib...	0.03893
Dog Aggression	GO:0045880	positive regulation of smoothened signal...	0.04021
Dog Aggression	GO:0030433	ubiquitin-dependent ERAD pathway	0.04474
Dog Aggression	GO:0070206	protein trimerization	0.04619
Dog Aggression	GO:2000147	positive regulation of cell motility	0.04638
Dog Aggression	GO:0001946	lymphangiogenesis	0.04659
Dog Aggression	GO:0003180	aortic valve morphogenesis	0.04659
Dog Aggression	GO:0003215	cardiac right ventricle morphogenesis	0.04659
Dog Aggression	GO:0006027	glycosaminoglycan catabolic process	0.04659
Dog Aggression	GO:0006883	cellular sodium ion homeostasis	0.04659
Dog Aggression	GO:0007076	mitotic chromosome condensation	0.04659
Dog Aggression	GO:0034138	toll-like receptor 3 signaling pathway	0.04659
Dog Aggression	GO:0046685	response to arsenic-containing substance	0.04659
Dog Aggression	GO:0051954	positive regulation of amine transport	0.04659
Dog Aggression	GO:0070207	protein homotrimerization	0.04659
Dog Aggression	GO:0090110	cargo loading into COPII-coated vesicle	0.04659
Dog Aggression	GO:2000811	negative regulation of anoikis	0.04659
Dog Aggression	GO:0017157	regulation of exocytosis	0.04678
Dog Aggression	GO:0022602	ovulation cycle process	0.04931
Dog Fear	GO:0045022	early endosome to late endosome transpor...	0.00058
Dog Fear	GO:0010508	positive regulation of autophagy	0.00073
Dog Fear	GO:0050775	positive regulation of dendrite morphoge...	0.00074
Dog Fear	GO:0099518	vesicle cytoskeletal trafficking	0.00338
Dog Fear	GO:0035556	intracellular signal transduction	0.00339
Dog Fear	GO:0034138	toll-like receptor 3 signaling pathway	0.00526
Dog Fear	GO:0048820	hair follicle maturation	0.00526
Dog Fear	GO:0050796	regulation of insulin secretion	0.00585
Dog Fear	GO:0051098	regulation of binding	0.00655
Dog Fear	GO:0006900	vesicle budding from membrane	0.00682
Dog Fear	GO:2000001	regulation of DNA damage checkpoint	0.00683
Dog Fear	GO:0009880	embryonic pattern specification	0.01065
Dog Fear	GO:0060390	regulation of SMAD protein signal transd...	0.01075
Dog Fear	GO:0060999	positive regulation of dendritic spine d...	0.01075
Dog Fear	GO:0070129	regulation of mitochondrial translation	0.01075
Dog Fear	GO:0017157	regulation of exocytosis	0.01299
Dog Fear	GO:0051043	regulation of membrane protein ectodomai...	0.0131
Dog Fear	GO:0001541	ovarian follicle development	0.01414
Dog Fear	GO:0032502	developmental process	0.01497
Dog Fear	GO:0034333	adherens junction assembly	0.01569
Dog Fear	GO:0032436	positive regulation of proteasomal ubiqu...	0.01621
Dog Fear	GO:0007411	axon guidance	0.01733
Dog Fear	GO:0071168	protein localization to chromatin	0.01863
Dog Fear	GO:0016358	dendrite development	0.02081
Dog Fear	GO:0051224	negative regulation of protein transport	0.02163
Dog Fear	GO:0009063	cellular amino acid catabolic process	0.02174
Dog Fear	GO:2000352	negative regulation of endothelial cell ...	0.02525
Dog Fear	GO:0022008	neurogenesis	0.02724
Dog Fear	GO:0046834	lipid phosphorylation	0.0281
Dog Fear	GO:0032008	positive regulation of TOR signaling	0.02897
Dog Fear	GO:0006513	protein monoubiquitination	0.03268
Dog Fear	GO:0014059	regulation of dopamine secretion	0.03297
Dog Fear	GO:0043330	response to exogenous dsRNA	0.03297
Dog Fear	GO:0045471	response to ethanol	0.03297
Dog Fear	GO:0042330	taxis	0.03358
Dog Fear	GO:0006470	protein dephosphorylation	0.03382
Dog Fear	GO:0016202	regulation of striated muscle tissue dev...	0.03388
Dog Fear	GO:0034204	lipid translocation	0.03391
Dog Fear	GO:1903557	positive regulation of tumor necrosis fa...	0.03395
Dog Fear	GO:0002697	regulation of immune effector process	0.03397
Dog Fear	GO:0046546	development of primary male sexual chara...	0.03399
Dog Fear	GO:0002294	CD4-positive, alpha-beta T cell differen...	0.03403
Dog Fear	GO:0009145	purine nucleoside triphosphate biosynthe...	0.03414
Dog Fear	GO:0030850	prostate gland development	0.03542
Dog Fear	GO:0001756	somitogenesis	0.03593
Dog Fear	GO:0007399	nervous system development	0.03717
Dog Fear	GO:0008089	anterograde axonal transport	0.03724
Dog Fear	GO:0045727	positive regulation of translation	0.03847
Dog Fear	GO:0071902	positive regulation of protein serine/th...	0.03864
Dog Fear	GO:0048013	ephrin receptor signaling pathway	0.04178
Dog Fear	GO:1902116	negative regulation of organelle assembl...	0.04178
Dog Fear	GO:0002218	activation of innate immune response	0.04289
Dog Fear	GO:1901570	fatty acid derivative biosynthetic proce...	0.04325
Dog Fear	GO:0030517	negative regulation of axon extension	0.04329
Dog Fear	GO:0006171	cAMP biosynthetic process	0.04335
Dog Fear	GO:0006684	sphingomyelin metabolic process	0.04335
Dog Fear	GO:0017004	cytochrome complex assembly	0.04335
Dog Fear	GO:0032438	melanosome organization	0.04335
Dog Fear	GO:0032770	positive regulation of monooxygenase act...	0.04335
Dog Fear	GO:0033158	regulation of protein import into nucleu...	0.04335
Dog Fear	GO:0033194	response to hydroperoxide	0.04335
Dog Fear	GO:0034397	telomere localization	0.04335
Dog Fear	GO:0060749	mammary gland alveolus development	0.04335
Dog Fear	GO:0061081	positive regulation of myeloid leukocyte...	0.04335
Dog Fear	GO:0070920	regulation of production of small RNA in...	0.04335
Dog Fear	GO:2000052	positive regulation of non-canonical Wnt...	0.04335
Dog Fear	GO:0031398	positive regulation of protein ubiquitin...	0.04386
Dog Fear	GO:0019439	aromatic compound catabolic process	0.04575
Dog Fear	GO:0035418	protein localization to synapse	0.04658
Dog Fear	GO:2001259	positive regulation of cation channel ac...	0.04658
Dog Fear	GO:0006302	double-strand break repair	0.04661
Dog Fear	GO:0030155	regulation of cell adhesion	0.04941
Dog Fear	GO:0031397	negative regulation of protein ubiquitin...	0.04968
Dog Rivalry	GO:0048477	oogenesis	0.00091
Dog Rivalry	GO:0006984	ER-nucleus signaling pathway	0.00174
Dog Rivalry	GO:0006896	Golgi to vacuole transport	0.00268
Dog Rivalry	GO:0042100	B cell proliferation	0.00268
Dog Rivalry	GO:0072384	organelle transport along microtubule	0.00349
Dog Rivalry	GO:0060669	embryonic placenta morphogenesis	0.00412
Dog Rivalry	GO:0001541	ovarian follicle development	0.00622
Dog Rivalry	GO:0051293	establishment of spindle localization	0.00671
Dog Rivalry	GO:0022900	electron transport chain	0.00791
Dog Rivalry	GO:0070192	chromosome organization involved in meio...	0.00806
Dog Rivalry	GO:0030048	actin filament-based movement	0.00825
Dog Rivalry	GO:0010464	regulation of mesenchymal cell prolifera...	0.00996
Dog Rivalry	GO:0007214	gamma-aminobutyric acid signaling pathwa...	0.01547
Dog Rivalry	GO:0032092	positive regulation of protein binding	0.01776
Dog Rivalry	GO:0051932	synaptic transmission, GABAergic	0.02265
Dog Rivalry	GO:0031297	replication fork processing	0.02267
Dog Rivalry	GO:0110111	negative regulation of animal organ morp...	0.02267
Dog Rivalry	GO:0044260	cellular macromolecule metabolic process	0.02505
Dog Rivalry	GO:0099536	synaptic signaling	0.0266
Dog Rivalry	GO:1902850	microtubule cytoskeleton organization in...	0.02678
Dog Rivalry	GO:1901575	organic substance catabolic process	0.02736
Dog Rivalry	GO:0045580	regulation of T cell differentiation	0.02787
Dog Rivalry	GO:0015807	L-amino acid transport	0.02791
Dog Rivalry	GO:0010832	negative regulation of myotube different...	0.02792
Dog Rivalry	GO:0044248	cellular catabolic process	0.02801
Dog Rivalry	GO:0010466	negative regulation of peptidase activit...	0.02822
Dog Rivalry	GO:0007041	lysosomal transport	0.03135
Dog Rivalry	GO:0051496	positive regulation of stress fiber asse...	0.03139
Dog Rivalry	GO:0090305	nucleic acid phosphodiester bond hydroly...	0.03187
Dog Rivalry	GO:0006351	transcription, DNA-templated	0.03199
Dog Rivalry	GO:0006027	glycosaminoglycan catabolic process	0.03353
Dog Rivalry	GO:0006384	transcription initiation from RNA polyme...	0.03353
Dog Rivalry	GO:0007076	mitotic chromosome condensation	0.03353
Dog Rivalry	GO:0090110	cargo loading into COPII-coated vesicle	0.03353
Dog Rivalry	GO:1902894	negative regulation of pri-miRNA transcr...	0.03353
Dog Rivalry	GO:1905939	regulation of gonad development	0.03353
Dog Rivalry	GO:0030036	actin cytoskeleton organization	0.03744
Dog Rivalry	GO:0045132	meiotic chromosome segregation	0.03865
Dog Rivalry	GO:0030728	ovulation	0.03954
Dog Rivalry	GO:0050855	regulation of B cell receptor signaling ...	0.03954
Dog Rivalry	GO:0051303	establishment of chromosome localization	0.03954
Dog Rivalry	GO:0031146	SCF-dependent proteasomal ubiquitin-depe...	0.04161
Dog Rivalry	GO:0007275	multicellular organism development	0.04184
Dog Rivalry	GO:0010718	positive regulation of epithelial to mes...	0.04535
Dog Rivalry	GO:0007140	male meiotic nuclear division	0.04573
Dog Rivalry	GO:0060560	developmental growth involved in morphog...	0.04581
Dog Rivalry	GO:0002312	B cell activation involved in immune res...	0.04585
Dog Rivalry	GO:0032469	endoplasmic reticulum calcium ion homeos...	0.04592
Dog Rivalry	GO:0051383	kinetochore organization	0.04592
Dog Rivalry	GO:0060628	regulation of ER to Golgi vesicle-mediat...	0.04592
Dog Rivalry	GO:0007165	signal transduction	0.04597
Energy	GO:0001764	neuron migration	0.0026
Energy	GO:0006366	transcription by RNA polymerase II	0.0034
Energy	GO:0006890	retrograde vesicle-mediated transport, G...	0.0061
Energy	GO:1905515	non-motile cilium assembly	0.0072
Energy	GO:0007099	centriole replication	0.0075
Energy	GO:0070076	histone lysine demethylation	0.0076
Energy	GO:0051560	mitochondrial calcium ion homeostasis	0.0093
Energy	GO:0060074	synapse maturation	0.0093
Energy	GO:2000114	regulation of establishment of cell pola...	0.0093
Energy	GO:0031648	protein destabilization	0.0104
Energy	GO:0048193	Golgi vesicle transport	0.0128
Energy	GO:0050869	negative regulation of B cell activation	0.0132
Energy	GO:0042981	regulation of apoptotic process	0.0171
Energy	GO:0000413	protein peptidyl-prolyl isomerization	0.018
Energy	GO:0010586	miRNA metabolic process	0.0181
Energy	GO:0061512	protein localization to cilium	0.0199
Energy	GO:0021987	cerebral cortex development	0.0237
Energy	GO:0031023	microtubule organizing center organizati...	0.0273
Energy	GO:0021532	neural tube patterning	0.0279
Energy	GO:2000060	positive regulation of ubiquitin-depende...	0.028
Energy	GO:0065009	regulation of molecular function	0.0293
Energy	GO:0044272	sulfur compound biosynthetic process	0.0297
Energy	GO:0060512	prostate gland morphogenesis	0.0298
Energy	GO:0099536	synaptic signaling	0.0298
Energy	GO:0009201	ribonucleoside triphosphate biosynthetic...	0.0301
Energy	GO:0048856	anatomical structure development	0.0321
Energy	GO:0021549	cerebellum development	0.0338
Energy	GO:0032941	secretion by tissue	0.0338
Energy	GO:0006085	acetyl-CoA biosynthetic process	0.0343
Energy	GO:0009148	pyrimidine nucleoside triphosphate biosy...	0.0343
Energy	GO:0048311	mitochondrion distribution	0.0343
Energy	GO:0051127	positive regulation of actin nucleation	0.0343
Energy	GO:0060749	mammary gland alveolus development	0.0343
Energy	GO:0007030	Golgi organization	0.0398
Energy	GO:2000147	positive regulation of cell motility	0.041
Energy	GO:0006622	protein targeting to lysosome	0.0411
Energy	GO:0006833	water transport	0.0411
Energy	GO:0008334	histone mRNA metabolic process	0.0411
Energy	GO:0009220	pyrimidine ribonucleotide biosynthetic p...	0.0411
Energy	GO:0010984	regulation of lipoprotein particle clear...	0.0411
Energy	GO:0022038	corpus callosum development	0.0411
Energy	GO:0030888	regulation of B cell proliferation	0.0411
Energy	GO:0046132	pyrimidine ribonucleoside biosynthetic p...	0.0411
Energy	GO:0048172	regulation of short-term neuronal synapt...	0.0411
Energy	GO:0048240	sperm capacitation	0.0411
Energy	GO:0048245	eosinophil chemotaxis	0.0411
Energy	GO:2000251	positive regulation of actin cytoskeleto...	0.0411
Energy	GO:2000811	negative regulation of anoikis	0.0411
Energy	GO:0007162	negative regulation of cell adhesion	0.0412
Energy	GO:0009948	anterior/posterior axis specification	0.0416
Energy	GO:0035116	embryonic hindlimb morphogenesis	0.0416
Energy	GO:0043124	negative regulation of I-kappaB kinase/N...	0.0416
Energy	GO:1901998	toxin transport	0.0416
Energy	GO:0050770	regulation of axonogenesis	0.0456
Energy	GO:0006904	vesicle docking involved in exocytosis	0.0458
Energy	GO:0043628	ncRNA 3'-end processing	0.0482
Energy	GO:0035148	tube formation	0.0483
Energy	GO:0009154	purine ribonucleotide catabolic process	0.0484
Energy	GO:0032509	endosome transport via multivesicular bo...	0.0484
Energy	GO:0051571	positive regulation of histone H3-K4 met...	0.0484
Energy	GO:0090140	regulation of mitochondrial fission	0.0484
Energy	GO:0010628	positive regulation of gene expression	0.0495
Excitability	GO:0072425	signal transduction involved in G2 DNA d...	0.0032
Excitability	GO:0006336	DNA replication-independent nucleosome a...	0.0043
Excitability	GO:0016447	somatic recombination of immunoglobulin ...	0.0057
Excitability	GO:0008104	protein localization	0.007
Excitability	GO:0002385	mucosal immune response	0.0088
Excitability	GO:0046653	tetrahydrofolate metabolic process	0.0088
Excitability	GO:1990869	cellular response to chemokine	0.0093
Excitability	GO:0014706	striated muscle tissue development	0.0094
Excitability	GO:0010954	positive regulation of protein processin...	0.0107
Excitability	GO:0051570	regulation of histone H3-K9 methylation	0.0107
Excitability	GO:0008045	motor neuron axon guidance	0.0129
Excitability	GO:0021517	ventral spinal cord development	0.0137
Excitability	GO:0003009	skeletal muscle contraction	0.0153
Excitability	GO:0019731	antibacterial humoral response	0.018
Excitability	GO:0021884	forebrain neuron development	0.018
Excitability	GO:0007059	chromosome segregation	0.0214
Excitability	GO:0071356	cellular response to tumor necrosis fact...	0.0219
Excitability	GO:1903508	positive regulation of nucleic acid-temp...	0.0238
Excitability	GO:0014065	phosphatidylinositol 3-kinase signaling	0.0239
Excitability	GO:0051260	protein homooligomerization	0.0244
Excitability	GO:0051606	detection of stimulus	0.0252
Excitability	GO:0071417	cellular response to organonitrogen comp...	0.0254
Excitability	GO:0042149	cellular response to glucose starvation	0.0273
Excitability	GO:0030593	neutrophil chemotaxis	0.031
Excitability	GO:0071347	cellular response to interleukin-1	0.031
Excitability	GO:0021988	olfactory lobe development	0.0315
Excitability	GO:0045321	leukocyte activation	0.0317
Excitability	GO:0072524	pyridine-containing compound metabolic p...	0.0318
Excitability	GO:0099536	synaptic signaling	0.0319
Excitability	GO:0046777	protein autophosphorylation	0.0343
Excitability	GO:0050770	regulation of axonogenesis	0.0344
Excitability	GO:0031032	actomyosin structure organization	0.0345
Excitability	GO:0006767	water-soluble vitamin metabolic process	0.0347
Excitability	GO:0050890	cognition	0.0351
Excitability	GO:0002755	MyD88-dependent toll-like receptor signa...	0.0379
Excitability	GO:0010447	response to acidic pH	0.0379
Excitability	GO:0010738	regulation of protein kinase A signaling	0.0379
Excitability	GO:0010880	regulation of release of sequestered cal...	0.0379
Excitability	GO:0030033	microvillus assembly	0.0379
Excitability	GO:0034312	diol biosynthetic process	0.0379
Excitability	GO:0042559	pteridine-containing compound biosynthet...	0.0379
Excitability	GO:0061548	ganglion development	0.0379
Excitability	GO:0098719	sodium ion import across plasma membrane	0.0379
Excitability	GO:1901798	positive regulation of signal transducti...	0.0379
Excitability	GO:1903205	regulation of hydrogen peroxide-induced ...	0.0379
Excitability	GO:0006468	protein phosphorylation	0.0423
Excitability	GO:0045332	phospholipid translocation	0.0431
Excitability	GO:0007249	I-kappaB kinase/NF-kappaB signaling	0.0448
Excitability	GO:0006958	complement activation, classical pathway	0.0454
Excitability	GO:0016486	peptide hormone processing	0.0454
Excitability	GO:0030150	protein import into mitochondrial matrix	0.0454
Excitability	GO:0033151	V(D)J recombination	0.0454
Excitability	GO:0035493	SNARE complex assembly	0.0454
Excitability	GO:0060218	hematopoietic stem cell differentiation	0.0454
Excitability	GO:0071870	cellular response to catecholamine stimu...	0.0454
Excitability	GO:1901532	regulation of hematopoietic progenitor c...	0.0454
Excitability	GO:2000811	negative regulation of anoikis	0.0454
Excitability	GO:0006974	cellular response to DNA damage stimulus	0.0475
Excitability	GO:0030890	positive regulation of B cell proliferat...	0.0476
Excitability	GO:0035116	embryonic hindlimb morphogenesis	0.0476
Excitability	GO:0038083	peptidyl-tyrosine autophosphorylation	0.0476
Excitability	GO:0007030	Golgi organization	0.0496
Excitability	GO:0018105	peptidyl-serine phosphorylation	0.0496
Nonsocial Fear	GO:0044260	cellular macromolecule metabolic process	0.00042
Nonsocial Fear	GO:0031290	retinal ganglion cell axon guidance	0.00278
Nonsocial Fear	GO:0042307	positive regulation of protein import in...	0.00295
Nonsocial Fear	GO:0043547	positive regulation of GTPase activity	0.00448
Nonsocial Fear	GO:0033522	histone H2A ubiquitination	0.00616
Nonsocial Fear	GO:0035249	synaptic transmission, glutamatergic	0.00782
Nonsocial Fear	GO:0010575	positive regulation of vascular endothel...	0.00795
Nonsocial Fear	GO:0071453	cellular response to oxygen levels	0.00856
Nonsocial Fear	GO:0110020	regulation of actomyosin structure organ...	0.01116
Nonsocial Fear	GO:0060047	heart contraction	0.01119
Nonsocial Fear	GO:0006767	water-soluble vitamin metabolic process	0.01179
Nonsocial Fear	GO:0042733	embryonic digit morphogenesis	0.01539
Nonsocial Fear	GO:0010658	striated muscle cell apoptotic process	0.0176
Nonsocial Fear	GO:0032196	transposition	0.0176
Nonsocial Fear	GO:0032438	melanosome organization	0.0176
Nonsocial Fear	GO:0034143	regulation of toll-like receptor 4 signa...	0.0176
Nonsocial Fear	GO:0070932	histone H3 deacetylation	0.0176
Nonsocial Fear	GO:0106074	aminoacyl-tRNA metabolism involved in tr...	0.0176
Nonsocial Fear	GO:0007600	sensory perception	0.01781
Nonsocial Fear	GO:0035023	regulation of Rho protein signal transdu...	0.01784
Nonsocial Fear	GO:0032446	protein modification by small protein co...	0.02029
Nonsocial Fear	GO:0042330	taxis	0.02057
Nonsocial Fear	GO:0065009	regulation of molecular function	0.02062
Nonsocial Fear	GO:0032608	interferon-beta production	0.02082
Nonsocial Fear	GO:0015749	monosaccharide transmembrane transport	0.02087
Nonsocial Fear	GO:0046546	development of primary male sexual chara...	0.02101
Nonsocial Fear	GO:0044419	interspecies interaction between organis...	0.02115
Nonsocial Fear	GO:0006027	glycosaminoglycan catabolic process	0.02122
Nonsocial Fear	GO:0045777	positive regulation of blood pressure	0.02122
Nonsocial Fear	GO:0048820	hair follicle maturation	0.02122
Nonsocial Fear	GO:0070207	protein homotrimerization	0.02122
Nonsocial Fear	GO:0043087	regulation of GTPase activity	0.02215
Nonsocial Fear	GO:0034220	ion transmembrane transport	0.02499
Nonsocial Fear	GO:0032414	positive regulation of ion transmembrane...	0.02502
Nonsocial Fear	GO:0002230	positive regulation of defense response ...	0.02511
Nonsocial Fear	GO:0032509	endosome transport via multivesicular bo...	0.02511
Nonsocial Fear	GO:0006914	autophagy	0.02926
Nonsocial Fear	GO:1903861	positive regulation of dendrite extensio...	0.02928
Nonsocial Fear	GO:2000136	regulation of cell proliferation involve...	0.03369
Nonsocial Fear	GO:0046854	phosphatidylinositol phosphorylation	0.03631
Nonsocial Fear	GO:0006935	chemotaxis	0.03762
Nonsocial Fear	GO:0010765	positive regulation of sodium ion transp...	0.03835
Nonsocial Fear	GO:0051570	regulation of histone H3-K9 methylation	0.03835
Nonsocial Fear	GO:0060421	positive regulation of heart growth	0.04134
Nonsocial Fear	GO:0008045	motor neuron axon guidance	0.04323
Nonsocial Fear	GO:0035235	ionotropic glutamate receptor signaling ...	0.04323
Nonsocial Fear	GO:0048011	neurotrophin TRK receptor signaling path...	0.04323
Nonsocial Fear	GO:0060343	trabecula formation	0.04323
Nonsocial Fear	GO:0016567	protein ubiquitination	0.04904
Owner Aggression	GO:0044260	cellular macromolecule metabolic process	0.00076
Owner Aggression	GO:0042100	B cell proliferation	0.00262
Owner Aggression	GO:0030030	cell projection organization	0.0039
Owner Aggression	GO:0010043	response to zinc ion	0.00551
Owner Aggression	GO:0030010	establishment of cell polarity	0.00595
Owner Aggression	GO:0080134	regulation of response to stress	0.00663
Owner Aggression	GO:0002682	regulation of immune system process	0.0067
Owner Aggression	GO:0030001	metal ion transport	0.00974
Owner Aggression	GO:0016042	lipid catabolic process	0.01327
Owner Aggression	GO:0006471	protein ADP-ribosylation	0.01329
Owner Aggression	GO:0015833	peptide transport	0.01344
Owner Aggression	GO:0031579	membrane raft organization	0.01358
Owner Aggression	GO:0032309	icosanoid secretion	0.0136
Owner Aggression	GO:0090101	negative regulation of transmembrane rec...	0.01362
Owner Aggression	GO:0001782	B cell homeostasis	0.01533
Owner Aggression	GO:0000165	MAPK cascade	0.01748
Owner Aggression	GO:0007044	cell-substrate junction assembly	0.01767
Owner Aggression	GO:0060047	heart contraction	0.018
Owner Aggression	GO:0014070	response to organic cyclic compound	0.01989
Owner Aggression	GO:0035556	intracellular signal transduction	0.02189
Owner Aggression	GO:0002823	negative regulation of adaptive immune r...	0.02248
Owner Aggression	GO:0015918	sterol transport	0.02265
Owner Aggression	GO:0060548	negative regulation of cell death	0.02276
Owner Aggression	GO:0007030	Golgi organization	0.02462
Owner Aggression	GO:0015732	prostaglandin transport	0.02774
Owner Aggression	GO:0045623	negative regulation of T-helper cell dif...	0.02774
Owner Aggression	GO:0048535	lymph node development	0.02774
Owner Aggression	GO:0070262	peptidyl-serine dephosphorylation	0.02774
Owner Aggression	GO:2000316	regulation of T-helper 17 type immune re...	0.02774
Owner Aggression	GO:0001843	neural tube closure	0.02776
Owner Aggression	GO:0010595	positive regulation of endothelial cell ...	0.02801
Owner Aggression	GO:0031098	stress-activated protein kinase signalin...	0.0311
Owner Aggression	GO:0043124	negative regulation of I-kappaB kinase/N...	0.03111
Owner Aggression	GO:0071300	cellular response to retinoic acid	0.03111
Owner Aggression	GO:0006027	glycosaminoglycan catabolic process	0.03332
Owner Aggression	GO:0007512	adult heart development	0.03332
Owner Aggression	GO:0048791	calcium ion-regulated exocytosis of neur...	0.03332
Owner Aggression	GO:0050650	chondroitin sulfate proteoglycan biosynt...	0.03332
Owner Aggression	GO:2000463	positive regulation of excitatory postsy...	0.03332
Owner Aggression	GO:0045070	positive regulation of viral genome repl...	0.03433
Owner Aggression	GO:0048536	spleen development	0.03433
Owner Aggression	GO:0008361	regulation of cell size	0.03439
Owner Aggression	GO:0048286	lung alveolus development	0.03771
Owner Aggression	GO:0050766	positive regulation of phagocytosis	0.03771
Owner Aggression	GO:0002230	positive regulation of defense response ...	0.03929
Owner Aggression	GO:0072520	seminiferous tubule development	0.03929
Owner Aggression	GO:0072539	T-helper 17 cell differentiation	0.03929
Owner Aggression	GO:1904031	positive regulation of cyclin-dependent ...	0.03929
Owner Aggression	GO:2001032	regulation of double-strand break repair...	0.03929
Owner Aggression	GO:0031146	SCF-dependent proteasomal ubiquitin-depe...	0.04125
Owner Aggression	GO:0033674	positive regulation of kinase activity	0.04471
Owner Aggression	GO:2000649	regulation of sodium ion transmembrane t...	0.04496
Owner Aggression	GO:0045859	regulation of protein kinase activity	0.04504
Owner Aggression	GO:0007098	centrosome cycle	0.04517
Owner Aggression	GO:0046395	carboxylic acid catabolic process	0.04543
Owner Aggression	GO:0007020	microtubule nucleation	0.04563
Owner Aggression	GO:0010613	positive regulation of cardiac muscle hy...	0.04563
Owner Aggression	GO:1903861	positive regulation of dendrite extensio...	0.04563
Owner Aggression	GO:0006874	cellular calcium ion homeostasis	0.04999
Separation Problems	GO:0010977	negative regulation of neuron projection...	0.00038
Separation Problems	GO:0051099	positive regulation of binding	0.00064
Separation Problems	GO:0034329	cell junction assembly	0.00228
Separation Problems	GO:0032288	myelin assembly	0.004
Separation Problems	GO:0051304	chromosome separation	0.00741
Separation Problems	GO:0030866	cortical actin cytoskeleton organization	0.00833
Separation Problems	GO:0035561	regulation of chromatin binding	0.00936
Separation Problems	GO:0042176	regulation of protein catabolic process	0.01094
Separation Problems	GO:0043547	positive regulation of GTPase activity	0.01287
Separation Problems	GO:0043537	negative regulation of blood vessel endo...	0.01755
Separation Problems	GO:0046834	lipid phosphorylation	0.01944
Separation Problems	GO:0060047	heart contraction	0.0197
Separation Problems	GO:2000781	positive regulation of double-strand bre...	0.02006
Separation Problems	GO:0034613	cellular protein localization	0.0204
Separation Problems	GO:1903725	regulation of phospholipid metabolic pro...	0.02486
Separation Problems	GO:0031032	actomyosin structure organization	0.02541
Separation Problems	GO:0060255	regulation of macromolecule metabolic pr...	0.02622
Separation Problems	GO:0046546	development of primary male sexual chara...	0.02802
Separation Problems	GO:0015749	monosaccharide transmembrane transport	0.02805
Separation Problems	GO:0032467	positive regulation of cytokinesis	0.0287
Separation Problems	GO:0006892	post-Golgi vesicle-mediated transport	0.02871
Separation Problems	GO:0001921	positive regulation of receptor recyclin...	0.03049
Separation Problems	GO:0006744	ubiquinone biosynthetic process	0.03049
Separation Problems	GO:0070932	histone H3 deacetylation	0.03049
Separation Problems	GO:0106074	aminoacyl-tRNA metabolism involved in tr...	0.03049
Separation Problems	GO:0050848	regulation of calcium-mediated signaling	0.03637
Separation Problems	GO:0034612	response to tumor necrosis factor	0.03643
Separation Problems	GO:0030888	regulation of B cell proliferation	0.03652
Separation Problems	GO:0006833	water transport	0.03658
Separation Problems	GO:0007183	SMAD protein complex assembly	0.03658
Separation Problems	GO:0031498	chromatin disassembly	0.03658
Separation Problems	GO:0051580	regulation of neurotransmitter uptake	0.03658
Separation Problems	GO:0070102	interleukin-6-mediated signaling pathway	0.03658
Separation Problems	GO:0001541	ovarian follicle development	0.04282
Separation Problems	GO:0051983	regulation of chromosome segregation	0.04296
Separation Problems	GO:0002115	store-operated calcium entry	0.0431
Separation Problems	GO:2000727	positive regulation of cardiac muscle ce...	0.0431
Separation Problems	GO:0006509	membrane protein ectodomain proteolysis	0.0468
Separation Problems	GO:0010812	negative regulation of cell-substrate ad...	0.04989
Stranger Aggression	GO:0051383	kinetochore organization	0.0032
Stranger Aggression	GO:0070498	interleukin-1-mediated signaling pathway	0.007
Stranger Aggression	GO:0071773	cellular response to BMP stimulus	0.008
Stranger Aggression	GO:0008608	attachment of spindle microtubules to ki...	0.0128
Stranger Aggression	GO:0060047	heart contraction	0.0143
Stranger Aggression	GO:0006024	glycosaminoglycan biosynthetic process	0.0207
Stranger Aggression	GO:0002755	MyD88-dependent toll-like receptor signa...	0.0223
Stranger Aggression	GO:0010466	negative regulation of peptidase activit...	0.0223
Stranger Aggression	GO:0010880	regulation of release of sequestered cal...	0.0223
Stranger Aggression	GO:0046112	nucleobase biosynthetic process	0.0223
Stranger Aggression	GO:0050667	homocysteine metabolic process	0.0223
Stranger Aggression	GO:0072393	microtubule anchoring at microtubule org...	0.0223
Stranger Aggression	GO:0106074	aminoacyl-tRNA metabolism involved in tr...	0.0223
Stranger Aggression	GO:2000052	positive regulation of non-canonical Wnt...	0.0223
Stranger Aggression	GO:0014808	release of sequestered calcium ion into ...	0.0236
Stranger Aggression	GO:2001057	reactive nitrogen species metabolic proc...	0.0237
Stranger Aggression	GO:0050865	regulation of cell activation	0.0238
Stranger Aggression	GO:0007249	I-kappaB kinase/NF-kappaB signaling	0.0263
Stranger Aggression	GO:0050881	musculoskeletal movement	0.0267
Stranger Aggression	GO:0050982	detection of mechanical stimulus	0.0267
Stranger Aggression	GO:0006622	protein targeting to lysosome	0.0268
Stranger Aggression	GO:0006896	Golgi to vacuole transport	0.0268
Stranger Aggression	GO:0030859	polarized epithelial cell differentiatio...	0.0268
Stranger Aggression	GO:0035493	SNARE complex assembly	0.0268
Stranger Aggression	GO:0070633	transepithelial transport	0.0268
Stranger Aggression	GO:0072111	cell proliferation involved in kidney de...	0.0268
Stranger Aggression	GO:0072178	nephric duct morphogenesis	0.0268
Stranger Aggression	GO:0099590	neurotransmitter receptor internalizatio...	0.0268
Stranger Aggression	GO:1901881	positive regulation of protein depolymer...	0.0268
Stranger Aggression	GO:1905939	regulation of gonad development	0.0268
Stranger Aggression	GO:2000095	regulation of Wnt signaling pathway, pla...	0.0268
Stranger Aggression	GO:0017157	regulation of exocytosis	0.027
Stranger Aggression	GO:0031326	regulation of cellular biosynthetic proc...	0.0277
Stranger Aggression	GO:0045840	positive regulation of mitotic nuclear d...	0.0279
Stranger Aggression	GO:0016032	viral process	0.0315
Stranger Aggression	GO:0006534	cysteine metabolic process	0.0316
Stranger Aggression	GO:0071599	otic vesicle development	0.0316
Stranger Aggression	GO:0098911	regulation of ventricular cardiac muscle...	0.0316
Stranger Aggression	GO:1904031	positive regulation of cyclin-dependent ...	0.0316
Stranger Aggression	GO:0070534	protein K63-linked ubiquitination	0.0335
Stranger Aggression	GO:0006914	autophagy	0.0367
Stranger Aggression	GO:0034109	homotypic cell-cell adhesion	0.0367
Stranger Aggression	GO:0055081	anion homeostasis	0.0367
Stranger Aggression	GO:0007063	regulation of sister chromatid cohesion	0.0368
Stranger Aggression	GO:0019433	triglyceride catabolic process	0.0368
Stranger Aggression	GO:0071218	cellular response to misfolded protein	0.0368
Stranger Aggression	GO:0072337	modified amino acid transport	0.0368
Stranger Aggression	GO:0008333	endosome to lysosome transport	0.0395
Stranger Aggression	GO:0050710	negative regulation of cytokine secretio...	0.0395
Stranger Aggression	GO:0048666	neuron development	0.0408
Stranger Aggression	GO:0030177	positive regulation of Wnt signaling pat...	0.0419
Stranger Aggression	GO:0050807	regulation of synapse organization	0.042
Stranger Aggression	GO:0001780	neutrophil homeostasis	0.0423
Stranger Aggression	GO:0007064	mitotic sister chromatid cohesion	0.0423
Stranger Aggression	GO:0015813	L-glutamate transmembrane transport	0.0423
Stranger Aggression	GO:0030212	hyaluronan metabolic process	0.0423
Stranger Aggression	GO:0032148	activation of protein kinase B activity	0.0423
Stranger Aggression	GO:0051984	positive regulation of chromosome segreg...	0.0423
Stranger Aggression	GO:0072012	glomerulus vasculature development	0.0423
Stranger Aggression	GO:2000042	negative regulation of double-strand bre...	0.0423
Stranger Aggression	GO:0006418	tRNA aminoacylation for protein translat...	0.0427
Stranger Aggression	GO:0043123	positive regulation of I-kappaB kinase/N...	0.0432
Stranger Aggression	GO:0043254	regulation of protein complex assembly	0.0432
Stranger Aggression	GO:0009112	nucleobase metabolic process	0.0466
Stranger Aggression	GO:0050704	regulation of interleukin-1 secretion	0.0466
Stranger Aggression	GO:0043242	negative regulation of protein complex d...	0.0467
Stranger Aggression	GO:0031112	positive regulation of microtubule polym...	0.0468
Stranger Aggression	GO:0120035	regulation of plasma membrane bounded ce...	0.0478
Stranger Aggression	GO:0021516	dorsal spinal cord development	0.0481
Stranger Fear	GO:0001780	neutrophil homeostasis	0.002
Stranger Fear	GO:0042147	retrograde transport, endosome to Golgi	0.0024
Stranger Fear	GO:0050804	modulation of chemical synaptic transmis...	0.0026
Stranger Fear	GO:0000186	activation of MAPKK activity	0.0027
Stranger Fear	GO:1900182	positive regulation of protein localizat...	0.0029
Stranger Fear	GO:0035335	peptidyl-tyrosine dephosphorylation	0.0036
Stranger Fear	GO:0008015	blood circulation	0.0047
Stranger Fear	GO:0003015	heart process	0.0066
Stranger Fear	GO:0040012	regulation of locomotion	0.0067
Stranger Fear	GO:0044818	mitotic G2/M transition checkpoint	0.0067
Stranger Fear	GO:0018210	peptidyl-threonine modification	0.0068
Stranger Fear	GO:0035556	intracellular signal transduction	0.0077
Stranger Fear	GO:0032092	positive regulation of protein binding	0.0079
Stranger Fear	GO:0044774	mitotic DNA integrity checkpoint	0.0088
Stranger Fear	GO:0032467	positive regulation of cytokinesis	0.0095
Stranger Fear	GO:0060828	regulation of canonical Wnt signaling pa...	0.0109
Stranger Fear	GO:1901990	regulation of mitotic cell cycle phase t...	0.0109
Stranger Fear	GO:0035116	embryonic hindlimb morphogenesis	0.0119
Stranger Fear	GO:0051897	positive regulation of protein kinase B ...	0.0127
Stranger Fear	GO:0006656	phosphatidylcholine biosynthetic process	0.014
Stranger Fear	GO:0007379	segment specification	0.014
Stranger Fear	GO:0033158	regulation of protein import into nucleu...	0.014
Stranger Fear	GO:0046112	nucleobase biosynthetic process	0.014
Stranger Fear	GO:0050667	homocysteine metabolic process	0.014
Stranger Fear	GO:0106074	aminoacyl-tRNA metabolism involved in tr...	0.014
Stranger Fear	GO:0048813	dendrite morphogenesis	0.0159
Stranger Fear	GO:0010888	negative regulation of lipid storage	0.0168
Stranger Fear	GO:0030859	polarized epithelial cell differentiatio...	0.0168
Stranger Fear	GO:0043968	histone H2A acetylation	0.0168
Stranger Fear	GO:0051354	negative regulation of oxidoreductase ac...	0.0168
Stranger Fear	GO:0043547	positive regulation of GTPase activity	0.0184
Stranger Fear	GO:0042330	taxis	0.0188
Stranger Fear	GO:0099601	regulation of neurotransmitter receptor ...	0.0193
Stranger Fear	GO:0099175	regulation of postsynapse organization	0.0198
Stranger Fear	GO:0006534	cysteine metabolic process	0.02
Stranger Fear	GO:1903204	negative regulation of oxidative stress-...	0.02
Stranger Fear	GO:0031398	positive regulation of protein ubiquitin...	0.0211
Stranger Fear	GO:0006486	protein glycosylation	0.0218
Stranger Fear	GO:0048146	positive regulation of fibroblast prolif...	0.0228
Stranger Fear	GO:0009070	serine family amino acid biosynthetic pr...	0.0233
Stranger Fear	GO:0031935	regulation of chromatin silencing	0.0233
Stranger Fear	GO:0071218	cellular response to misfolded protein	0.0233
Stranger Fear	GO:0072337	modified amino acid transport	0.0233
Stranger Fear	GO:0089718	amino acid import across plasma membrane	0.0233
Stranger Fear	GO:0060173	limb development	0.0262
Stranger Fear	GO:0015813	L-glutamate transmembrane transport	0.0269
Stranger Fear	GO:0030540	female genitalia development	0.0269
Stranger Fear	GO:0033032	regulation of myeloid cell apoptotic pro...	0.0269
Stranger Fear	GO:0046653	tetrahydrofolate metabolic process	0.0269
Stranger Fear	GO:0060999	positive regulation of dendritic spine d...	0.0269
Stranger Fear	GO:0072012	glomerulus vasculature development	0.0269
Stranger Fear	GO:0008344	adult locomotory behavior	0.0284
Stranger Fear	GO:0046148	pigment biosynthetic process	0.0304
Stranger Fear	GO:0006793	phosphorus metabolic process	0.0305
Stranger Fear	GO:0006144	purine nucleobase metabolic process	0.0306
Stranger Fear	GO:0007616	long-term memory	0.0306
Stranger Fear	GO:0030903	notochord development	0.0306
Stranger Fear	GO:0051894	positive regulation of focal adhesion as...	0.0306
Stranger Fear	GO:0072348	sulfur compound transport	0.0343
Stranger Fear	GO:0016331	morphogenesis of embryonic epithelium	0.0345
Stranger Fear	GO:0001502	cartilage condensation	0.0346
Stranger Fear	GO:0006515	protein quality control for misfolded or...	0.0346
Stranger Fear	GO:0007026	negative regulation of microtubule depol...	0.0346
Stranger Fear	GO:0043114	regulation of vascular permeability	0.0346
Stranger Fear	GO:0072529	pyrimidine-containing compound catabolic...	0.0346
Stranger Fear	GO:0044260	cellular macromolecule metabolic process	0.0347
Stranger Fear	GO:0009112	nucleobase metabolic process	0.0364
Stranger Fear	GO:0106027	neuron projection organization	0.0365
Stranger Fear	GO:0043068	positive regulation of programmed cell d...	0.0366
Stranger Fear	GO:0016049	cell growth	0.0372
Stranger Fear	GO:0044272	sulfur compound biosynthetic process	0.0372
Stranger Fear	GO:0002040	sprouting angiogenesis	0.0387
Stranger Fear	GO:0006730	one-carbon metabolic process	0.0387
Stranger Fear	GO:0071168	protein localization to chromatin	0.0387
Stranger Fear	GO:1900087	positive regulation of G1/S transition o...	0.0387
Stranger Fear	GO:0042737	drug catabolic process	0.039
Stranger Fear	GO:0031397	negative regulation of protein ubiquitin...	0.04
Stranger Fear	GO:0043967	histone H4 acetylation	0.04
Stranger Fear	GO:1905515	non-motile cilium assembly	0.04
Stranger Fear	GO:0051402	neuron apoptotic process	0.0422
Stranger Fear	GO:0000578	embryonic axis specification	0.0431
Stranger Fear	GO:0014002	astrocyte development	0.0431
Stranger Fear	GO:0033363	secretory granule organization	0.0431
Stranger Fear	GO:0051590	positive regulation of neurotransmitter ...	0.0431
Stranger Fear	GO:2000036	regulation of stem cell population maint...	0.0431
Stranger Fear	GO:1901701	cellular response to oxygen-containing c...	0.0458
Stranger Fear	GO:0018209	peptidyl-serine modification	0.0469
Stranger Fear	GO:0051966	regulation of synaptic transmission, glu...	0.0472
Stranger Fear	GO:0019934	cGMP-mediated signaling	0.0476
Stranger Fear	GO:0043627	response to estrogen	0.0476
Stranger Fear	GO:0032436	positive regulation of proteasomal ubiqu...	0.0477
Touch Sensitivity	GO:0006998	nuclear envelope organization	0.00048
Touch Sensitivity	GO:0006687	glycosphingolipid metabolic process	0.00079
Touch Sensitivity	GO:0097484	dendrite extension	0.00162
Touch Sensitivity	GO:0010623	programmed cell death involved in cell d...	0.00232
Touch Sensitivity	GO:0021819	layer formation in cerebral cortex	0.00312
Touch Sensitivity	GO:2001224	positive regulation of neuron migration	0.00312
Touch Sensitivity	GO:0070665	positive regulation of leukocyte prolife...	0.00458
Touch Sensitivity	GO:0035886	vascular smooth muscle cell differentiat...	0.00518
Touch Sensitivity	GO:1903861	positive regulation of dendrite extensio...	0.00518
Touch Sensitivity	GO:0035116	embryonic hindlimb morphogenesis	0.00573
Touch Sensitivity	GO:0008625	extrinsic apoptotic signaling pathway vi...	0.00622
Touch Sensitivity	GO:0035162	embryonic hemopoiesis	0.00646
Touch Sensitivity	GO:0098930	axonal transport	0.00751
Touch Sensitivity	GO:0007097	nuclear migration	0.00791
Touch Sensitivity	GO:0016242	negative regulation of macroautophagy	0.00791
Touch Sensitivity	GO:0042733	embryonic digit morphogenesis	0.00928
Touch Sensitivity	GO:0048011	neurotrophin TRK receptor signaling path...	0.00953
Touch Sensitivity	GO:0042176	regulation of protein catabolic process	0.01094
Touch Sensitivity	GO:0070201	regulation of establishment of protein l...	0.01129
Touch Sensitivity	GO:1902042	negative regulation of extrinsic apoptot...	0.01134
Touch Sensitivity	GO:0050767	regulation of neurogenesis	0.0126
Touch Sensitivity	GO:0060536	cartilage morphogenesis	0.01517
Touch Sensitivity	GO:0072384	organelle transport along microtubule	0.01531
Touch Sensitivity	GO:0048643	positive regulation of skeletal muscle t...	0.0155
Touch Sensitivity	GO:0097352	autophagosome maturation	0.0155
Touch Sensitivity	GO:0030318	melanocyte differentiation	0.01786
Touch Sensitivity	GO:0007264	small GTPase mediated signal transductio...	0.0182
Touch Sensitivity	GO:0021801	cerebral cortex radial glia guided migra...	0.0196
Touch Sensitivity	GO:0090287	regulation of cellular response to growt...	0.0196
Touch Sensitivity	GO:1901343	negative regulation of vasculature devel...	0.01979
Touch Sensitivity	GO:0031032	actomyosin structure organization	0.02607
Touch Sensitivity	GO:0030488	tRNA methylation	0.02608
Touch Sensitivity	GO:0051642	centrosome localization	0.02608
Touch Sensitivity	GO:0007283	spermatogenesis	0.02682
Touch Sensitivity	GO:0070304	positive regulation of stress-activated ...	0.02826
Touch Sensitivity	GO:0035115	embryonic forelimb morphogenesis	0.02919
Touch Sensitivity	GO:0001952	regulation of cell-matrix adhesion	0.03027
Touch Sensitivity	GO:0021549	cerebellum development	0.03071
Touch Sensitivity	GO:0035023	regulation of Rho protein signal transdu...	0.03071
Touch Sensitivity	GO:0010658	striated muscle cell apoptotic process	0.03086
Touch Sensitivity	GO:0018279	protein N-linked glycosylation via aspar...	0.03086
Touch Sensitivity	GO:0034143	regulation of toll-like receptor 4 signa...	0.03086
Touch Sensitivity	GO:0070262	peptidyl-serine dephosphorylation	0.03086
Touch Sensitivity	GO:0070932	histone H3 deacetylation	0.03086
Touch Sensitivity	GO:0097067	cellular response to thyroid hormone sti...	0.03086
Touch Sensitivity	GO:1905606	regulation of presynapse assembly	0.03086
Touch Sensitivity	GO:0090090	negative regulation of canonical Wnt sig...	0.0347
Touch Sensitivity	GO:0060078	regulation of postsynaptic membrane pote...	0.03547
Touch Sensitivity	GO:0016236	macroautophagy	0.03635
Touch Sensitivity	GO:0030888	regulation of B cell proliferation	0.03674
Touch Sensitivity	GO:0031018	endocrine pancreas development	0.03691
Touch Sensitivity	GO:1901215	negative regulation of neuron death	0.03691
Touch Sensitivity	GO:0097192	extrinsic apoptotic signaling pathway in...	0.03697
Touch Sensitivity	GO:0006677	glycosylceramide metabolic process	0.03703
Touch Sensitivity	GO:0006688	glycosphingolipid biosynthetic process	0.03703
Touch Sensitivity	GO:0034969	histone arginine methylation	0.03703
Touch Sensitivity	GO:0042219	cellular modified amino acid catabolic p...	0.03703
Touch Sensitivity	GO:0050650	chondroitin sulfate proteoglycan biosynt...	0.03703
Touch Sensitivity	GO:0051151	negative regulation of smooth muscle cel...	0.03703
Touch Sensitivity	GO:2000463	positive regulation of excitatory postsy...	0.03703
Touch Sensitivity	GO:0034612	response to tumor necrosis factor	0.03732
Touch Sensitivity	GO:0008584	male gonad development	0.03821
Touch Sensitivity	GO:0042177	negative regulation of protein catabolic...	0.03913
Touch Sensitivity	GO:0042531	positive regulation of tyrosine phosphor...	0.03967
Touch Sensitivity	GO:0009566	fertilization	0.03986
Touch Sensitivity	GO:0006511	ubiquitin-dependent protein catabolic pr...	0.0401
Touch Sensitivity	GO:0050680	negative regulation of epithelial cell p...	0.04257
Touch Sensitivity	GO:0043551	regulation of phosphatidylinositol 3-kin...	0.04324
Touch Sensitivity	GO:0001953	negative regulation of cell-matrix adhes...	0.04343
Touch Sensitivity	GO:0099175	regulation of postsynapse organization	0.04343
Touch Sensitivity	GO:0001541	ovarian follicle development	0.04353
Touch Sensitivity	GO:0031929	TOR signaling	0.04353
Touch Sensitivity	GO:2000134	negative regulation of G1/S transition o...	0.04353
Touch Sensitivity	GO:0014912	negative regulation of smooth muscle cel...	0.04362
Touch Sensitivity	GO:0045109	intermediate filament organization	0.04362
Touch Sensitivity	GO:0051457	maintenance of protein location in nucle...	0.04362
Touch Sensitivity	GO:0060055	angiogenesis involved in wound healing	0.04362
Touch Sensitivity	GO:1902043	positive regulation of extrinsic apoptot...	0.04362
Touch Sensitivity	GO:0051056	regulation of small GTPase mediated sign...	0.0484
Touch Sensitivity	GO:0060560	developmental growth involved in morphog...	0.04965
Trainability	GO:0031116	positive regulation of microtubule polym...	0.00049
Trainability	GO:0032956	regulation of actin cytoskeleton organiz...	0.00076
Trainability	GO:0048013	ephrin receptor signaling pathway	0.00083
Trainability	GO:0051893	regulation of focal adhesion assembly	0.00092
Trainability	GO:0006890	retrograde vesicle-mediated transport, G...	0.00125
Trainability	GO:0050850	positive regulation of calcium-mediated ...	0.00321
Trainability	GO:0048843	negative regulation of axon extension in...	0.0039
Trainability	GO:0001662	behavioral fear response	0.0047
Trainability	GO:2000249	regulation of actin cytoskeleton reorgan...	0.00496
Trainability	GO:0048172	regulation of short-term neuronal synapt...	0.00502
Trainability	GO:0030032	lamellipodium assembly	0.00553
Trainability	GO:0060325	face morphogenesis	0.00771
Trainability	GO:0035886	vascular smooth muscle cell differentiat...	0.00828
Trainability	GO:1902117	positive regulation of organelle assembl...	0.00874
Trainability	GO:0006497	protein lipidation	0.01006
Trainability	GO:0007099	centriole replication	0.01016
Trainability	GO:0014706	striated muscle tissue development	0.01026
Trainability	GO:0014033	neural crest cell differentiation	0.01038
Trainability	GO:0048705	skeletal system morphogenesis	0.01155
Trainability	GO:0010765	positive regulation of sodium ion transp...	0.01253
Trainability	GO:2000114	regulation of establishment of cell pola...	0.01253
Trainability	GO:0051099	positive regulation of binding	0.01254
Trainability	GO:0007411	axon guidance	0.01496
Trainability	GO:0051491	positive regulation of filopodium assemb...	0.01505
Trainability	GO:1901021	positive regulation of calcium ion trans...	0.01505
Trainability	GO:1900006	positive regulation of dendrite developm...	0.01522
Trainability	GO:0007420	brain development	0.01607
Trainability	GO:0006886	intracellular protein transport	0.01742
Trainability	GO:0042594	response to starvation	0.02075
Trainability	GO:0045581	negative regulation of T cell differenti...	0.02092
Trainability	GO:0060536	cartilage morphogenesis	0.02092
Trainability	GO:0019080	viral gene expression	0.02096
Trainability	GO:0050919	negative chemotaxis	0.02117
Trainability	GO:0051966	regulation of synaptic transmission, glu...	0.02409
Trainability	GO:0010586	miRNA metabolic process	0.02419
Trainability	GO:0019228	neuronal action potential	0.02419
Trainability	GO:0045724	positive regulation of cilium assembly	0.02419
Trainability	GO:0086019	cell-cell signaling involved in cardiac ...	0.02419
Trainability	GO:0031334	positive regulation of protein complex a...	0.02439
Trainability	GO:1901343	negative regulation of vasculature devel...	0.02711
Trainability	GO:0031057	negative regulation of histone modificat...	0.02728
Trainability	GO:0097502	mannosylation	0.02729
Trainability	GO:0055117	regulation of cardiac muscle contraction	0.02749
Trainability	GO:0071216	cellular response to biotic stimulus	0.02754
Trainability	GO:0002062	chondrocyte differentiation	0.02761
Trainability	GO:0043537	negative regulation of blood vessel endo...	0.02777
Trainability	GO:0043552	positive regulation of phosphatidylinosi...	0.02777
Trainability	GO:0060444	branching involved in mammary gland duct...	0.03161
Trainability	GO:0198738	cell-cell signaling by wnt	0.03319
Trainability	GO:0031023	microtubule organizing center organizati...	0.03351
Trainability	GO:0050684	regulation of mRNA processing	0.03427
Trainability	GO:0000045	autophagosome assembly	0.03703
Trainability	GO:0055010	ventricular cardiac muscle tissue morpho...	0.03964
Trainability	GO:0034260	negative regulation of GTPase activity	0.04009
Trainability	GO:0002244	hematopoietic progenitor cell differenti...	0.04148
Trainability	GO:0022617	extracellular matrix disassembly	0.04193
Trainability	GO:0006662	glycerol ether metabolic process	0.04207
Trainability	GO:0035721	intraciliary retrograde transport	0.04207
Trainability	GO:0046500	S-adenosylmethionine metabolic process	0.04207
Trainability	GO:0048535	lymph node development	0.04207
Trainability	GO:0051127	positive regulation of actin nucleation	0.04207
Trainability	GO:0070920	regulation of production of small RNA in...	0.04207
Trainability	GO:1904951	positive regulation of establishment of ...	0.04221
Trainability	GO:0070884	regulation of calcineurin-NFAT signaling...	0.04471
Trainability	GO:0006888	ER to Golgi vesicle-mediated transport	0.0466
Trainability	GO:0051865	protein autoubiquitination	0.04725
Trainability	GO:0016236	macroautophagy	0.04968
Trainability	GO:0031047	gene silencing by RNA	0.04993
